# Supplementary material
Source: PubMed Central journal article supplement (PMC4753257)
Supplement: onc2014469x2.pdf [file onc2014469x2.pdf]

|             | p27         | Myc         | Rb.pS807/S811 | Normalized Proliferation Values |
|-------------|-------------|-------------|---------------|---------------------------------|
| miR-561     | 1.520057668 | 1.028115215 | 0.764647546   | 0.752165612                     |
| miR-615-5p  | 1.193730031 | 0.889797284 | 0.889899931   | 0.882403288                     |
| miR-589     | 1.983686342 | 0.637507916 | 0.607651022   | 0.854864044                     |
| miR-128     | 1.176473607 | 1.120154879 | 1.051008327   | 0.972479567                     |
| miR-557     | 1.375669116 | 0.910103877 | 0.812550321   | 0.943792854                     |
| miR-500     | 1.302943095 | 0.806102796 | 0.784482481   | 0.808965303                     |
| miR-1225-3p | 1.203305149 | 0.658612411 | 0.810067837   | 0.923712155                     |
| miR-1305    | 0.944537527 | 1.105891748 | 0.797393991   | 0.864043792                     |
| miR-595     | 0.930712797 | 0.652996547 | 0.902852834   | 0.928875763                     |
| miR-559     | 1.083244184 | 0.736500539 | 0.952329898   | 0.903631456                     |
| miR-891a    | 1.176129021 | 0.818948247 | 0.758290194   | 0.818145051                     |
| miR-193b*   | 1.041509428 | 0.596555397 | 0.672671008   | 0.842815624                     |
| miR-374a*   | 0.741894153 | 0.893208366 | 0.904168613   | 0.932318169                     |
| miR-92a-1*  | 0.946156043 | 0.936859701 | 0.775006703   | 0.807817835                     |
| miR-146a*   | 0.891071759 | 0.96797768  | 0.862341976   | 0.963873553                     |
| miR-34a     | 1.227818892 | 0.637056969 | 0.74419301    | 0.796916884                     |
| miR-19a*    | 1.029293768 | 0.935316336 | 0.940247478   | 0.919696015                     |
| miR-486-5p  | 1.521251121 | 1.115314601 | 0.850509794   | 0.928302029                     |
| miR-30b*    | 1.636420653 | 0.82737318  | 0.818719434   | 0.69938206                      |
| miR-9       | 0.975775241 | 0.902769248 | 1.117030649   | 0.899615316                     |
| miR-606     | 1.188391748 | 1.185485874 | 0.869412261   | 0.866338729                     |
| miR-548b-5p | 1.235597064 | 1.089925505 | 0.831832805   | 0.885845694                     |
| miR-887     | 1.178909827 | 0.874257148 | 0.745583692   | 0.886419428                     |
| miR-373     | 0.944577001 | 0.926667818 | 0.734740704   | 0.919696015                     |
| miR-363*    | 1.680777307 | 0.795413049 | 0.666427133   | 0.72233143                      |
| miR-2113    | 0.916171558 | 1.112783092 | 1.242403146   | 0.828472268                     |
| miR-1299    | 1.833729387 | 0.784339963 | 0.663051846   | 0.836504548                     |
| miR-450a    | 1.076533047 | 0.921304796 | 0.907304693   | 0.943219119                     |
| miR-921     | 1.273803189 | 0.725279767 | 0.746489296   | 0.86519126                      |
| miR-33a     | 1.283882992 | 0.840172869 | 0.884530012   | 0.834783345                     |
| miR-220b    | 0.995523852 | 1.1101787   | 1.146593058   | 0.882977022                     |
| miR-518d-5p | 1.011528878 | 0.915727226 | 0.833071962   | 0.861175121                     |
| miR-924     | 1.727707275 | 0.569260313 | 0.4696909     | 0.69938206                      |
| miR-876-5p  | 0.97232999  | 1.266958839 | 1.083597202   | 0.888714365                     |
| miR-518f    | 0.945022109 | 0.937254279 | 0.932583011   | 0.941497917                     |
| miR-154     | 0.944596264 | 0.82841712  | 0.906180027   | 0.847979233                     |
| miR-146b-5p | 1.32605171  | 0.76749373  | 0.777066454   | 0.901336519                     |
| miR-1236    | 0.877789831 | 1.115351527 | 1.025960293   | 0.851421638                     |
| miR-487b    | 1.042021934 | 0.987011953 | 0.903514683   | 0.866338729                     |
| miR-339-5p  | 1.342822909 | 1.229639371 | 1.128899101   | 0.92715456                      |
| miR-302d*   | 1.034544069 | 1.165492431 | 0.926006635   | 0.880108351                     |
| miR-621     | 1.857435704 | 0.73639387  | 0.569101362   | 0.736674787                     |
| miR-32*     | 1.189836067 | 0.991631442 | 0.655438636   | 0.777409919                     |
| miR-200c*   | 1.319945465 | 1.210094992 | 0.913935819   | 0.85027417                      |
| miR-193b    | 2.631383666 | 0.809863059 | 0.343959742   | 0.639713697                     |
| miR-190     | 0.741363286 | 0.809068948 | 0.860478303   | 0.864617526                     |

|             |             |             |             |             |
|-------------|-------------|-------------|-------------|-------------|
| miR-1973    | 1.263437269 | 0.874656139 | 0.999890472 | 0.943792854 |
| miR-518f*   | 1.111375823 | 0.982040586 | 0.86528702  | 0.931744434 |
| miR-135a    | 1.138262051 | 0.857110271 | 0.874988012 | 0.870928603 |
| miR-1255b   | 1.466514427 | 0.770909568 | 0.841821696 | 0.897894113 |
| miR-299-3p  | 1.68818001  | 0.765469203 | 0.760132029 | 0.66036813  |
| miR-15a     | 2.10403803  | 0.954553238 | 0.601523283 | 0.63340262  |
| miR-488*    | 0.904784713 | 1.070821055 | 0.977935314 | 0.891583036 |
| miR-106b*   | 1.327525422 | 0.930782838 | 0.759901615 | 0.840520687 |
| miR-16-2*   | 1.210942583 | 0.757609051 | 0.655519612 | 0.882977022 |
| miR-671-3p  | 1.070773869 | 0.838075358 | 1.023503416 | 0.755034283 |
| miR-556-3p  | 1.345338872 | 1.129213803 | 0.701421014 | 0.868059932 |
| miR-99a*    | 1.05964032  | 0.963929888 | 0.839877011 | 0.916253609 |
| miR-645     | 1.230969117 | 0.876137484 | 0.709126462 | 0.826751065 |
| miR-802     | 1.454252518 | 0.939282788 | 0.679025782 | 0.793474478 |
| miR-29c*    | 2.189736902 | 1.053672183 | 0.876392156 | 0.790605807 |
| miR-548c-3p | 1.078923405 | 1.099016939 | 0.96458643  | 0.839373219 |
| miR-15a*    | 2.467263509 | 0.747565167 | 0.605184176 | 0.800933024 |
| miR-193a-3p | 2.234104882 | 0.682374734 | 0.320162758 | 0.577176663 |
| miR-545     | 1.011993676 | 0.880549828 | 0.886742626 | 0.913958672 |
| miR-181a-2* | 1.117131417 | 0.985043564 | 1.03160919  | 0.921417218 |
| miR-369-3p  | 1.053299674 | 0.887686268 | 0.936962765 | 0.915106141 |
| miR-935     | 1.118225907 | 0.905321158 | 0.87622313  | 0.897894113 |
| miR-1306    | 1.682285568 | 0.71998979  | 0.785419337 | 0.824456128 |
| miR-302c    | 0.89390176  | 1.005608582 | 0.860071262 | 0.943792854 |
| miR-298     | 2.600826735 | 0.834014535 | 0.537257631 | 0.778557388 |
| miR-185*    | 1.328266413 | 0.819506729 | 0.886484138 | 0.747002003 |
| miR-1324    | 1.13921804  | 0.781528194 | 0.768979875 | 0.989691594 |
| miR-188-5p  | 1.009228932 | 1.385032437 | 1.063842235 | 1.041901412 |
| miR-1268    | 1.183700598 | 0.840624886 | 0.875837892 | 0.963873553 |
| miR-655     | 2.017209608 | 0.798325476 | 0.783975738 | 0.60242097  |
| miR-149     | 1.010924593 | 0.901275762 | 0.888604201 | 0.919122281 |
| miR-668     | 1.577224122 | 0.915586109 | 0.789373366 | 0.969037161 |
| miR-208b    | 1.689436175 | 1.143674015 | 0.685205403 | 1.014935902 |
| miR-541     | 2.179631141 | 0.682900048 | 0.64423571  | 0.720610228 |
| miR-30a     | 1.545294497 | 0.804651465 | 0.704422569 | 0.855437778 |
| miR-1468    | 1.259597152 | 1.014893128 | 0.895082296 | 0.847405498 |
| let-7e*     | 1.75330365  | 1.023646728 | 0.629708808 | 0.718889025 |
| miR-875-5p  | 1.259854631 | 0.7533615   | 0.750356031 | 0.862322589 |
| miR-548p    | 1.061364217 | 0.765806896 | 0.751946998 | 0.874944743 |
| miR-302a*   | 1.15888323  | 0.784586689 | 0.859922196 | 0.897894113 |
| miR-1825    | 0.836113029 | 0.827270348 | 0.981408405 | 0.959857413 |
| miR-516-3p  | 1.016693599 | 0.898588835 | 0.80416472  | 0.861175121 |
| miR-370     | 1.194009985 | 0.762535286 | 0.794814627 | 0.851421638 |
| miR-124     | 2.279912089 | 0.581527116 | 0.611254161 | 0.596109894 |
| miR-382     | 2.518667201 | 0.728798795 | 0.793845202 | 0.899615316 |
| miR-10b     | 1.297560021 | 0.971876731 | 0.750641581 | 0.900762784 |
| miR-1250    | 1.428667436 | 0.75833701  | 1.052568409 | 0.778557388 |

|             |             |             |             |             |
|-------------|-------------|-------------|-------------|-------------|
| miR-519e*   | 1.016574251 | 1.166126351 | 0.890769347 | 0.949530196 |
| miR-337-3p  | 1.575409786 | 0.923051963 | 0.758258178 | 0.919696015 |
| miR-1913    | 1.143461676 | 1.087353466 | 1.014226628 | 0.942071651 |
| miR-194*    | 1.416924744 | 0.925111985 | 0.920435371 | 0.870354869 |
| miR-98      | 0.988307535 | 0.83430654  | 0.848906883 | 0.767082702 |
| miR-553     | 0.973165233 | 0.866597348 | 0.910107297 | 0.876665946 |
| miR-583     | 1.291889633 | 0.85165644  | 0.831779312 | 0.73036371  |
| miR-640     | 2.158930051 | 0.711399356 | 0.549738692 | 0.715446619 |
| miR-33b*    | 0.800550997 | 0.6224286   | 1.056660511 | 0.921990952 |
| miR-886-3p  | 3.031782718 | 0.601696931 | 0.633211346 | 0.830193471 |
| miR-548c-5p | 1.050090714 | 0.916301859 | 0.920383465 | 0.927728295 |
| miR-379*    | 1.116501791 | 0.972640854 | 0.828627923 | 0.82330866  |
| miR-376a    | 1.606276523 | 0.72727851  | 0.909392682 | 0.71831529  |
| miR-518a-3p | 1.022454072 | 0.761015559 | 0.826400595 | 0.917974812 |
| miR-138-1*  | 1.213614169 | 0.786707563 | 0.723873432 | 0.88125582  |
| miR-662     | 1.02590009  | 0.874142641 | 0.789132009 | 0.919696015 |
| miR-18a     | 3.074605569 | 0.647767118 | 0.657021002 | 0.846831764 |
| miR-663b    | 1.162120248 | 0.825315229 | 0.872775636 | 0.875518477 |
| miR-599     | 0.984596504 | 0.957023855 | 1.069884393 | 0.853716575 |
| miR-622     | 1.161712046 | 0.80093893  | 0.961042278 | 0.806670366 |
| miR-630     | 1.677215063 | 0.903593633 | 0.921267747 | 0.812981443 |
| miR-302d    | 0.766127336 | 0.929773073 | 0.8534528   | 0.906500127 |
| miR-30e*    | 0.761968787 | 1.047049137 | 0.914657826 | 0.814128912 |
| miR-130b    | 0.955440758 | 0.742485577 | 0.857214156 | 0.974200769 |
| miR-554     | 1.060969297 | 1.05665509  | 1.039876435 | 0.951251399 |
| miR-616*    | 1.010905085 | 0.997208409 | 1.044302567 | 0.920269749 |
| miR-132     | 0.837566398 | 1.223262805 | 0.801723312 | 0.79634315  |
| miR-34c-5p  | 1.416932077 | 0.714522988 | 0.798806475 | 0.718889025 |
| miR-323-3p  | 1.114255672 | 1.050380194 | 0.824284069 | 0.713151682 |
| miR-130b*   | 1.005470548 | 1.12745364  | 0.877639319 | 0.845684296 |
| miR-1275    | 0.984106244 | 0.779143405 | 0.902793009 | 0.749870675 |
| miR-1280    | 1.232803134 | 1.047070351 | 0.747075371 | 0.791753275 |
| miR-337-5p  | 1.22978224  | 0.769459115 | 0.767856224 | 0.781999793 |
| miR-181c    | 1.313260883 | 1.196558927 | 1.001620313 | 0.812981443 |
| let-7g*     | 1.264613158 | 0.811788705 | 0.62629732  | 0.69536592  |
| miR-542-5p  | 1.122401516 | 0.687348387 | 0.988971495 | 0.885845694 |
| miR-214*    | 1.505461883 | 0.949156121 | 0.614302016 | 0.605863376 |
| miR-106b    | 1.234006624 | 0.683129532 | 0.770318508 | 0.955267539 |
| miR-153     | 0.831752609 | 0.940927645 | 1.198590175 | 0.929449497 |
| miR-20a     | 1.133068093 | 0.775951383 | 0.859924321 | 0.918548546 |
| miR-648     | 0.930348711 | 0.745494965 | 0.814146534 | 0.677006424 |
| miR-220a    | 1.03571434  | 0.994821744 | 0.768128733 | 0.913384938 |
| miR-548a-3p | 1.176473607 | 0.862199508 | 0.71907532  | 0.89617291  |
| miR-151-5p  | 1.017431918 | 0.744851755 | 1.150930706 | 0.885845694 |
| miR-149*    | 1.635325522 | 0.697531149 | 0.743923921 | 0.780852325 |
| miR-296-3p  | 1.228724166 | 0.793001375 | 0.977055304 | 0.897894113 |
| miR-455-5p  | 0.824184535 | 0.790329119 | 1.181789549 | 0.92313842  |

|             |             |             |             |             |
|-------------|-------------|-------------|-------------|-------------|
| miR-551b*   | 1.4763932   | 0.954882629 | 0.855538345 | 0.903631456 |
| miR-296-5p  | 1.663060848 | 0.938321765 | 0.691861254 | 0.798064352 |
| miR-1323    | 1.215526954 | 0.79600603  | 0.739684912 | 0.81527638  |
| miR-604     | 0.936677406 | 0.887529383 | 0.741823699 | 0.780852325 |
| miR-551a    | 1.111378556 | 0.977162178 | 0.780590755 | 0.884124491 |
| miR-563     | 1.135802167 | 1.214479982 | 0.945756465 | 0.870354869 |
| miR-1915    | 1.133348615 | 0.934937179 | 0.856314523 | 0.958709944 |
| miR-181d    | 1.278918392 | 1.292799232 | 0.927051341 | 0.852569107 |
| miR-411     | 0.932426637 | 0.976236682 | 0.759369103 | 0.822161191 |
| miR-708*    | 0.999423203 | 0.906272544 | 0.896891826 | 0.851421638 |
| miR-320c    | 2.125875519 | 0.928253134 | 0.762246597 | 0.958709944 |
| miR-92b*    | 1.326851105 | 0.907363663 | 1.129764068 | 0.974774504 |
| miR-409-3p  | 1.706035906 | 1.166428899 | 0.646337243 | 0.768803905 |
| miR-1262    | 1.37101501  | 0.844087843 | 0.531241443 | 0.650040914 |
| miR-1976    | 1.365642719 | 0.612586559 | 0.59847574  | 0.710283011 |
| miR-18a*    | 1.009296268 | 0.701022136 | 0.884986756 | 0.837652016 |
| miR-126*    | 0.930514842 | 1.06620371  | 0.961232227 | 0.940350448 |
| miR-1290    | 1.078101911 | 0.836988082 | 0.922458862 | 0.90822133  |
| miR-30e     | 1.202266936 | 0.859496621 | 0.785373482 | 0.876092211 |
| miR-507     | 1.27676859  | 1.226742236 | 0.750146719 | 0.725773836 |
| miR-218     | 0.84292612  | 0.774113397 | 1.088435287 | 0.90420519  |
| miR-1978    | 1.517101233 | 1.008030451 | 1.313463786 | 0.949530196 |
| miR-99b*    | 1.129166049 | 0.737023434 | 0.792940267 | 0.939776714 |
| miR-1       | 1.699528014 | 0.825723203 | 0.576098832 | 0.756755486 |
| miR-384     | 0.809849818 | 0.897758978 | 0.914269433 | 0.998871342 |
| miR-20b*    | 1.512041889 | 0.97708395  | 1.036372176 | 0.883550757 |
| miR-380*    | 1.183602602 | 1.025090392 | 0.872012226 | 0.737248521 |
| miR-658     | 1.41336704  | 0.896165145 | 0.832806396 | 0.946087791 |
| miR-136     | 1.107374473 | 0.837438773 | 1.04258535  | 0.942645385 |
| miR-1224-3p | 1.294008845 | 0.995997508 | 0.99734419  | 0.92715456  |
| miR-1231    | 1.20815009  | 1.121134078 | 1.059683967 | 0.83822575  |
| miR-539     | 1.258695689 | 0.810076087 | 0.801816801 | 0.963299818 |
| miR-525-3p  | 1.128006202 | 0.696796362 | 0.74511881  | 0.953546336 |
| miR-210     | 0.911719976 | 0.820815408 | 1.346055101 | 1.009198559 |
| miR-517c    | 0.750889496 | 0.97972403  | 1.139490438 | 0.905926393 |
| miR-135b    | 1.013150144 | 0.923263798 | 0.799053573 | 0.91223747  |
| miR-549     | 1.42043698  | 0.938673688 | 0.662078775 | 0.917974812 |
| miR-638     | 1.009378954 | 0.880902253 | 0.813252515 | 0.986822923 |
| miR-383     | 2.138036572 | 0.534791994 | 0.292577133 | 0.728068773 |
| miR-155*    | 1.040346048 | 0.825333233 | 0.741647044 | 0.952972602 |
| miR-1286    | 1.709519285 | 0.808197259 | 0.722005616 | 0.787163401 |
| miR-222     | 0.770209916 | 0.940409244 | 0.795108728 | 0.883550757 |
| miR-548f    | 1.117062441 | 0.841484372 | 0.774096534 | 0.987396657 |
| miR-633     | 1.101509387 | 0.872530729 | 0.941208098 | 0.86519126  |
| miR-1298    | 1.026366915 | 1.263653763 | 0.965169088 | 0.862896323 |
| miR-575     | 0.998153023 | 0.725487744 | 0.704048004 | 0.885845694 |
| miR-1538    | 1.205026965 | 0.923400466 | 0.849045923 | 0.963299818 |

|             |             |             |             |             |
|-------------|-------------|-------------|-------------|-------------|
| miR-496     | 1.729267022 | 0.815367969 | 0.706516595 | 0.884124491 |
| miR-518a-5p | 1.63883547  | 0.786436236 | 0.580354397 | 0.75732922  |
| miR-509-5p  | 1.308428918 | 1.072063531 | 0.708938175 | 0.814702646 |
| miR-517a    | 0.87687285  | 0.915851133 | 1.169506457 | 0.871502337 |
| miR-2054    | 1.201316522 | 1.424093356 | 0.790392916 | 0.839373219 |
| miR-26b     | 1.276973732 | 1.058116662 | 0.862223541 | 0.948382728 |
| miR-381     | 0.975533271 | 1.14534973  | 1.12773826  | 1.010346028 |
| miR-532-5p  | 1.874302144 | 0.924686656 | 0.498610784 | 0.607010845 |
| miR-34b     | 1.70017658  | 0.7567704   | 0.734008527 | 0.798638087 |
| miR-148a*   | 1.244741253 | 0.865003539 | 0.699737045 | 0.910516267 |
| miR-664     | 0.968496324 | 0.967542845 | 1.046058941 | 0.93518684  |
| miR-518c*   | 1.006809852 | 0.87167294  | 0.843953624 | 0.933465637 |
| miR-522     | 1.005445303 | 0.675129449 | 0.514277832 | 0.746428269 |
| miR-19b-2*  | 1.176473607 | 0.831935959 | 0.940292567 | 0.911663735 |
| miR-1254    | 1.521998836 | 0.743934928 | 0.657601601 | 0.791753275 |
| miR-1539    | 1.076419271 | 0.924358986 | 0.849897268 | 0.966742224 |
| miR-17      | 1.129626697 | 0.76840435  | 0.745612302 | 0.963299818 |
| miR-625*    | 1.266296377 | 0.963633158 | 0.739289013 | 0.881829554 |
| miR-342-5p  | 1.298152045 | 0.73240888  | 0.677693093 | 0.73839599  |
| miR-99a     | 1.176473607 | 1.343499853 | 0.924169154 | 0.895599176 |
| miR-15b*    | 1.23627861  | 1.352144073 | 0.886642512 | 0.863470058 |
| miR-19a     | 1.080455303 | 0.708129806 | 1.022248261 | 0.973627035 |
| miR-362-3p  | 1.487001961 | 0.805390816 | 0.804289615 | 0.919696015 |
| miR-216b    | 0.98152619  | 1.087524505 | 0.856215692 | 0.948956462 |
| miR-320a    | 1.509982656 | 0.881274198 | 0.865225857 | 0.947808994 |
| miR-374b    | 1.207537951 | 0.993343482 | 0.739336902 | 0.800359289 |
| let-7d      | 1.016305964 | 0.829327653 | 0.83554227  | 0.79634315  |
| miR-1204    | 1.126489755 | 0.993402894 | 0.944863359 | 0.810686506 |
| miR-661     | 1.526467942 | 0.77562176  | 0.593166243 | 0.629386481 |
| miR-1228*   | 1.022368901 | 0.911677873 | 0.967378626 | 0.922564686 |
| miR-363     | 0.991187368 | 1.391342016 | 1.135146087 | 0.909368798 |
| miR-331-5p  | 1.136186054 | 0.735237426 | 1.158366411 | 0.895025442 |
| miR-548b-3p | 1.176473607 | 1.101523499 | 0.948811418 | 0.919122281 |
| miR-708     | 1.397716992 | 0.986852252 | 1.259481091 | 0.830193471 |
| miR-412     | 0.93697207  | 0.984028851 | 1.017957665 | 0.995428937 |
| miR-450b-3p | 1.377410852 | 0.711648625 | 0.743107735 | 0.812407709 |
| miR-1228    | 1.167136137 | 0.977209437 | 0.768153629 | 0.918548546 |
| miR-302b    | 0.874793935 | 0.872746759 | 0.778195584 | 0.935760574 |
| miR-568     | 0.90314119  | 0.991893963 | 0.834590843 | 0.897894113 |
| miR-941     | 1.032043654 | 0.857374661 | 0.774736639 | 0.928302029 |
| miR-541*    | 1.145734025 | 0.742805072 | 0.872183539 | 0.934039371 |
| miR-376a*   | 1.877685787 | 0.718701445 | 0.669276996 | 0.777983653 |
| miR-409-5p  | 2.139755889 | 1.012464422 | 0.824296674 | 0.716020353 |
| miR-556-5p  | 1.446203136 | 0.813549996 | 0.762078729 | 0.820439988 |
| miR-433     | 1.03482366  | 0.968294898 | 0.841372305 | 0.737822255 |
| miR-519c-3p | 1.071399629 | 0.907922469 | 0.740822586 | 0.976495706 |
| miR-1972    | 1.354622623 | 0.928747445 | 0.897031726 | 0.874944743 |

|             |             |             |             |             |
|-------------|-------------|-------------|-------------|-------------|
| miR-154*    | 1.511468536 | 0.911467834 | 0.703170178 | 0.862896323 |
| miR-593     | 0.90861979  | 0.699729641 | 0.907110745 | 0.557038591 |
| miR-624     | 1.845600378 | 0.584318158 | 0.618192205 | 0.86519126  |
| miR-525-5p  | 1.150790681 | 0.906040974 | 0.64749141  | 0.690776046 |
| miR-429     | 1.099289757 | 1.284086497 | 0.929974705 | 0.588077614 |
| miR-548d-3p | 1.258111525 | 0.957062057 | 0.896588231 | 0.869781134 |
| miR-21      | 1.822446079 | 0.876211278 | 0.967782708 | 0.82330866  |
| miR-501-5p  | 1.489695852 | 0.850624971 | 0.921299331 | 0.73839599  |
| miR-140-3p  | 1.00182784  | 0.854127064 | 0.897517678 | 0.916827344 |
| miR-548o    | 0.922482275 | 0.961165336 | 0.894277655 | 0.936334308 |
| miR-675     | 1.219817886 | 0.779500899 | 0.844129458 | 0.946661525 |
| miR-1260    | 1.516548071 | 0.933887316 | 0.779372614 | 0.946661525 |
| miR-145     | 1.227483124 | 0.836462483 | 0.891066258 | 0.946661525 |
| miR-1256    | 1.176473607 | 0.907772669 | 1.085267998 | 0.786015933 |
| miR-502-5p  | 0.86352411  | 1.044297567 | 1.183572707 | 0.907647595 |
| miR-1308    | 1.340762863 | 0.80821009  | 0.985110067 | 0.841668156 |
| miR-1237    | 1.154829771 | 0.998726015 | 0.965377199 | 0.861175121 |
| miR-1253    | 1.222858086 | 0.874211025 | 0.618942783 | 0.876092211 |
| miR-326     | 1.146501178 | 0.914112438 | 0.822918677 | 0.851995373 |
| miR-635     | 1.037248302 | 0.73096934  | 1.175722028 | 0.957562476 |
| miR-1297    | 1.188117175 | 1.115899438 | 1.04780501  | 0.977069441 |
| miR-592     | 1.140832903 | 0.952743964 | 0.968204425 | 0.884698225 |
| miR-625     | 1.102624661 | 0.815581896 | 0.949141147 | 0.844536827 |
| miR-518e*   | 1.311557233 | 0.889847521 | 0.743673399 | 0.930596966 |
| miR-371-5p  | 1.327208503 | 0.836619082 | 0.874302705 | 0.894451708 |
| miR-20b     | 1.533215466 | 0.719565639 | 0.745446123 | 0.944940322 |
| miR-375     | 1.172058167 | 0.840030115 | 1.022560509 | 0.75331308  |
| miR-620     | 1.16765556  | 0.739566438 | 0.914410094 | 0.926007092 |
| miR-1276    | 1.185486248 | 0.747276303 | 0.793198298 | 0.771672576 |
| miR-1238    | 0.925220626 | 0.902448822 | 1.144978813 | 0.878387148 |
| miR-506     | 1.749909398 | 0.57906578  | 0.678389134 | 0.716594088 |
| miR-877     | 1.031699557 | 0.923488854 | 0.920089593 | 0.885845694 |
| miR-200c    | 0.964773015 | 1.442283845 | 1.060545494 | 0.696513389 |
| miR-377*    | 1.413381397 | 0.865353699 | 0.803789364 | 0.690776046 |
| miR-520g    | 1.012585105 | 0.992926345 | 0.90851648  | 0.955841273 |
| miR-653     | 0.954019648 | 1.077373729 | 0.83768727  | 0.908795064 |
| miR-15b     | 1.570882874 | 0.8952021   | 0.558624621 | 0.547399855 |
| miR-96*     | 0.982983939 | 0.926306608 | 0.988882092 | 0.830193471 |
| miR-629*    | 1.049732427 | 1.157347727 | 0.818733256 | 0.742985864 |
| miR-335*    | 0.641355806 | 1.185632304 | 1.013310123 | 0.994281468 |
| miR-636     | 0.756704121 | 0.92522373  | 1.156968777 | 1.004608685 |
| miR-24      | 0.769037035 | 0.875151112 | 1.017304786 | 0.916253609 |
| miR-425     | 1.004806191 | 1.069432919 | 1.042103396 | 0.868059932 |
| miR-1207-5p | 0.987411304 | 0.872449649 | 0.91794025  | 0.891583036 |
| miR-192     | 1.278162877 | 1.036034748 | 0.804675117 | 0.646024774 |
| miR-410     | 0.954619942 | 1.036325528 | 0.852838542 | 0.879534617 |
| miR-548g    | 1.076628467 | 0.995098646 | 0.934235277 | 0.853142841 |

|             |             |             |             |             |
|-------------|-------------|-------------|-------------|-------------|
| miR-493     | 1.444978615 | 0.87720936  | 0.91645024  | 0.724626367 |
| miR-1274a   | 1.08438728  | 0.963521318 | 1.017403698 | 0.886993162 |
| miR-637     | 0.908207225 | 0.758560549 | 0.955307217 | 0.803227961 |
| miR-555     | 2.412439842 | 0.477658082 | 0.50139272  | 0.773393779 |
| miR-503     | 1.575348054 | 0.993523615 | 0.607294338 | 0.688481109 |
| miR-125b-1* | 1.086993961 | 0.923901935 | 1.050084207 | 0.953546336 |
| miR-548n    | 1.170314431 | 1.244856598 | 1.053781539 | 0.916827344 |
| miR-196a    | 0.903678962 | 0.842895256 | 0.803408744 | 0.737822255 |
| miR-923     | 0.984965274 | 1.066473792 | 1.121892062 | 0.893877973 |
| miR-490-3p  | 1.149309399 | 1.238823401 | 0.722839966 | 0.822161191 |
| miR-100     | 1.18897762  | 1.466000947 | 0.995632908 | 0.81527638  |
| miR-1248    | 0.75969268  | 1.067570185 | 1.082653553 | 0.912811204 |
| let-7c      | 1.001913877 | 0.886100176 | 0.897333023 | 0.770525108 |
| miR-340*    | 0.990181795 | 1.022606612 | 1.032522657 | 0.898467847 |
| miR-10a     | 1.132056489 | 1.015504232 | 0.775916442 | 0.833635876 |
| miR-1201    | 1.320840007 | 0.878933731 | 0.906815161 | 0.81929252  |
| miR-939     | 1.157897509 | 0.911122859 | 1.055599008 | 0.932318169 |
| miR-520a-3p | 0.745184296 | 0.86636868  | 0.813758517 | 0.935760574 |
| miR-23a     | 1.137472958 | 0.945390529 | 1.177263482 | 0.907073861 |
| miR-24-1*   | 2.121041868 | 0.753509519 | 0.726009978 | 0.761919094 |
| miR-505*    | 1.310645462 | 0.646120202 | 1.112120963 | 0.837652016 |
| miR-187     | 0.962327475 | 0.981569892 | 1.095488513 | 0.955841273 |
| miR-365     | 2.876559186 | 0.845467693 | 0.430886726 | 0.678153892 |
| miR-615-3p  | 0.974389672 | 0.793894703 | 0.965317348 | 0.832488408 |
| miR-495     | 1.040150751 | 1.071568416 | 0.982339948 | 0.88125582  |
| miR-485-5p  | 0.922142328 | 0.785331174 | 1.019914159 | 0.758476689 |
| miR-32      | 0.91245338  | 1.45408851  | 1.06883294  | 0.89617291  |
| miR-7-1*    | 0.894122024 | 1.023642109 | 1.012439753 | 0.878387148 |
| miR-1470    | 1.176473607 | 0.923734382 | 1.061976226 | 0.945514056 |
| miR-876-3p  | 2.05296153  | 0.852412962 | 0.412815632 | 0.405859614 |
| miR-626     | 1.006918421 | 0.67687735  | 0.863323083 | 0.878387148 |
| miR-367     | 1.058057075 | 1.1506586   | 0.812271607 | 0.836504548 |
| miR-1977    | 1.245693886 | 0.566079807 | 0.792150946 | 0.652909585 |
| miR-453     | 1.101244153 | 1.100245641 | 1.401180789 | 0.893304239 |
| miR-24-2*   | 1.81816203  | 0.873554158 | 0.586941328 | 0.873797274 |
| let-7a*     | 1.219105505 | 1.103601387 | 0.65140236  | 0.794048212 |
| miR-148b    | 0.74082467  | 0.994322027 | 1.322490843 | 1.001166279 |
| miR-665     | 1.425824818 | 0.132880032 | 0.503830195 | 0.544072196 |
| miR-136*    | 1.0286514   | 0.910387227 | 0.57662501  | 0.834783345 |
| miR-512-3p  | 1.070268811 | 0.578506535 | 0.96753254  | 0.859453918 |
| miR-146b-3p | 1.166616776 | 0.850573911 | 0.958818853 | 0.814128912 |
| miR-320b    | 1.519756053 | 0.727192848 | 0.759883153 | 0.924285889 |
| miR-34c-3p  | 1.408410657 | 0.701380296 | 0.692422944 | 0.694792186 |
| miR-656     | 0.868649881 | 1.05097214  | 0.932096116 | 0.853716575 |
| miR-431     | 1.176473607 | 0.762041786 | 1.033843543 | 0.866338729 |
| miR-611     | 0.901964113 | 0.890209712 | 0.812930045 | 0.915106141 |
| miR-145*    | 1.774431312 | 0.751685406 | 0.733776831 | 0.697660857 |

|              |             |             |             |             |
|--------------|-------------|-------------|-------------|-------------|
| miR-526b*    | 1.000010957 | 0.661569931 | 0.802034127 | 0.937481777 |
| miR-623      | 0.960575143 | 1.047565215 | 0.980849624 | 0.870928603 |
| miR-650      | 1.597887472 | 0.72746981  | 0.804336773 | 0.794621947 |
| miR-194      | 1.244157413 | 0.914906161 | 0.745384341 | 0.776262451 |
| miR-448      | 0.871353001 | 0.878596773 | 1.062321401 | 0.967889693 |
| miR-431*     | 1.344970205 | 0.652098918 | 0.685455319 | 0.826177331 |
| miR-29c      | 1.285010987 | 1.082810998 | 1.073248272 | 0.921990952 |
| miR-580      | 1.150842086 | 0.828261987 | 0.695016255 | 0.900762784 |
| miR-340      | 1.241880631 | 0.92928394  | 0.690020222 | 0.702824466 |
| miR-325      | 1.029864142 | 1.056617475 | 1.001846086 | 0.894451708 |
| miR-940      | 0.836473019 | 0.938803099 | 0.890681442 | 0.91223747  |
| miR-1295     | 1.48965553  | 0.850062949 | 0.711867721 | 0.828472268 |
| miR-144      | 1.95384388  | 0.651437301 | 0.717804754 | 0.828472268 |
| miR-497      | 1.796160603 | 0.817659481 | 0.528693897 | 0.442062245 |
| miR-886-5p   | 1.161803142 | 0.82113324  | 0.947843142 | 0.97018463  |
| miR-664*     | 1.045117432 | 0.937122408 | 0.820612421 | 0.870928603 |
| miR-497*     | 1.030755235 | 1.029029972 | 0.765499459 | 0.919122281 |
| miR-197      | 1.18143741  | 1.294230338 | 0.885236214 | 0.779704856 |
| miR-224      | 1.198240834 | 0.934355273 | 0.796432418 | 0.96616849  |
| miR-485-3p   | 0.909431694 | 0.930257419 | 0.898529759 | 0.864043792 |
| miR-331-3p   | 0.858085035 | 1.001131102 | 0.960772632 | 0.946661525 |
| miR-1224-5p  | 1.176473607 | 0.785695052 | 0.786415216 | 0.882403288 |
| miR-1263     | 2.332722436 | 0.761606532 | 0.702133788 | 0.615616858 |
| miR-199a-5p  | 0.713106852 | 1.120940598 | 0.888676481 | 0.993134    |
| miR-105      | 0.876679745 | 0.984083723 | 0.790119103 | 0.840520687 |
| miR-651      | 0.830250361 | 0.940950739 | 1.115905563 | 0.92715456  |
| miR-27a*     | 1.420798611 | 0.704930416 | 0.739765049 | 0.814128912 |
| miR-1303     | 0.790820774 | 0.910170165 | 1.04786522  | 0.950677665 |
| miR-367*     | 0.872065252 | 0.608745893 | 0.987213956 | 0.899615316 |
| miR-508-5p   | 1.160192775 | 0.886845796 | 0.822392032 | 0.911663735 |
| miR-768-5p   | 0.893753469 | 0.964805502 | 1.016320859 | 0.92715456  |
| miR-125b     | 0.862298863 | 1.043991918 | 1.046155925 | 1.04304888  |
| miR-217      | 1.176473607 | 0.930003919 | 0.977695588 | 0.882403288 |
| miR-509-3-5p | 1.43326264  | 0.987965521 | 0.875096334 | 0.874371009 |
| miR-147b     | 1.136320917 | 0.70320909  | 1.059770037 | 0.985675455 |
| miR-618      | 1.059196562 | 1.002914313 | 0.949274462 | 0.974200769 |
| miR-423-3p   | 1.087005123 | 1.13853673  | 0.94857348  | 0.911663735 |
| miR-502-3p   | 1.289152171 | 0.878233507 | 0.696176019 | 0.798638087 |
| miR-659      | 0.896688376 | 0.972385241 | 0.902092166 | 0.871502337 |
| miR-195      | 1.682885573 | 0.995654717 | 0.592336949 | 0.639713697 |
| miR-888      | 1.077553952 | 0.99614406  | 0.848534653 | 0.868633666 |
| miR-379      | 0.942565297 | 1.07549015  | 0.904433573 | 0.892730505 |
| miR-513c     | 1.05117254  | 1.054880904 | 1.04650747  | 0.98911786  |
| miR-1227     | 1.176255715 | 0.79371152  | 1.098343248 | 0.92715456  |
| miR-519b-3p  | 0.970266039 | 0.90553615  | 0.697244312 | 0.975921972 |
| miR-548i     | 0.962040225 | 1.061448096 | 0.978085556 | 0.982806783 |
| miR-610      | 1.176473607 | 0.763821305 | 0.841597431 | 0.91223747  |



|             |             |             |             |             |
|-------------|-------------|-------------|-------------|-------------|
| miR-644     | 1.509998509 | 0.707974414 | 0.62804829  | 0.617338061 |
| miR-499-5p  | 0.985056301 | 1.089685788 | 0.971937314 | 1.019525776 |
| miR-33a*    | 1.144548978 | 1.180891134 | 0.868266377 | 0.944366588 |
| miR-589*    | 1.218296013 | 0.859678325 | 0.713045418 | 0.921990952 |
| miR-376b    | 1.625375201 | 0.744080979 | 0.89737914  | 0.726921304 |
| miR-1283    | 1.107322578 | 0.793980299 | 1.080777558 | 1.002887482 |
| miR-1271    | 1.492818534 | 0.874241813 | 1.043995779 | 0.779704856 |
| miR-483-3p  | 1.225576372 | 1.426556403 | 0.804285239 | 0.806096632 |
| miR-518c    | 1.029824745 | 0.933046685 | 0.849528321 | 0.986822923 |
| miR-1289    | 1.375295418 | 0.891644083 | 0.800379238 | 0.628812746 |
| miR-1827    | 0.981101116 | 0.798911149 | 0.861427172 | 0.636271292 |
| miR-22*     | 0.948038009 | 1.025631441 | 0.977414558 | 0.804949163 |
| miR-944     | 1.134310835 | 1.098409178 | 0.693108108 | 0.726921304 |
| miR-758     | 1.176473607 | 0.82216624  | 0.77661372  | 0.858306449 |
| miR-602     | 0.918771701 | 0.937491422 | 0.97012168  | 1.024689384 |
| miR-519d    | 1.120290807 | 0.649304489 | 0.7778204   | 0.990839063 |
| miR-586     | 1.253313096 | 0.875914039 | 0.757024142 | 0.860601386 |
| miR-424     | 1.51656616  | 0.85648736  | 0.56613184  | 0.604142173 |
| miR-1184    | 1.194795184 | 0.858039773 | 0.648495634 | 0.954693805 |
| miR-1251    | 0.984911105 | 0.952721455 | 0.821249321 | 0.893877973 |
| miR-1285    | 1.390686422 | 0.752700713 | 0.871595215 | 0.867486197 |
| miR-196a*   | 1.329441187 | 0.725909431 | 0.691842826 | 0.752165612 |
| miR-770-5p  | 0.994507244 | 0.865176894 | 0.842960668 | 1.020673244 |
| miR-223     | 0.877372256 | 1.424261128 | 1.156696694 | 0.940924182 |
| miR-587     | 0.878499818 | 1.051471977 | 1.023547644 | 0.934613106 |
| miR-520d-5p | 1.979992606 | 0.720003489 | 0.620735654 | 0.586356411 |
| miR-1267    | 1.147433025 | 1.135915713 | 1.627070846 | 0.966742224 |
| miR-1270    | 1.855964547 | 0.597849396 | 0.773842735 | 0.890435568 |
| miR-513b    | 1.176473607 | 0.717262145 | 0.903146996 | 0.88125582  |
| miR-378     | 1.432669001 | 0.792423495 | 0.732846276 | 0.894451708 |
| miR-452*    | 1.521417811 | 1.232672781 | 0.793530551 | 0.737822255 |
| miR-324-3p  | 1.176473607 | 0.978835167 | 0.940117801 | 0.916253609 |
| miR-182     | 1.102068948 | 0.713520327 | 0.791902482 | 0.863470058 |
| miR-1915*   | 1.239011203 | 0.894518117 | 0.840983317 | 0.839373219 |
| miR-101     | 2.005121218 | 0.922266583 | 0.816253166 | 0.829619736 |
| miR-96      | 1.389412748 | 0.767279881 | 0.811998333 | 0.83822575  |
| miR-185     | 1.494206591 | 0.555035017 | 0.859398012 | 0.957562476 |
| miR-302e    | 0.909167245 | 0.963318412 | 0.801856223 | 1.000592545 |
| miR-1914    | 1.176473607 | 0.83790808  | 0.997037636 | 1.030426727 |
| miR-1178    | 1.18456258  | 0.665354059 | 0.815301533 | 0.936908043 |
| miR-744     | 1.800866658 | 0.720459606 | 0.741260641 | 0.860027652 |
| miR-1274b   | 1.127941838 | 0.90777652  | 0.937819671 | 0.99715014  |
| miR-647     | 0.829212779 | 1.011801677 | 0.880477449 | 0.885271959 |
| miR-562     | 1.354896628 | 0.953485145 | 0.651973744 | 0.878960883 |
| miR-551b    | 1.122944778 | 1.113232461 | 0.865568662 | 0.95813621  |
| miR-202*    | 2.155901812 | 0.735154758 | 0.864002781 | 0.993134    |
| miR-582-5p  | 1.129441816 | 1.455083968 | 0.736895787 | 0.861175121 |

|             |             |             |             |             |
|-------------|-------------|-------------|-------------|-------------|
| miR-520h    | 1.379531367 | 1.162762029 | 1.118308632 | 0.987396657 |
| miR-19b     | 1.115339151 | 0.72627309  | 0.963563151 | 0.993707734 |
| let-7b      | 1.176359294 | 0.770236077 | 0.869665781 | 0.81929252  |
| miR-1909*   | 0.783869643 | 0.924305259 | 1.00148999  | 0.950677665 |
| miR-508-3p  | 1.333704339 | 0.69149143  | 0.76477588  | 0.755034283 |
| miR-578     | 0.889993926 | 0.919595268 | 0.786423419 | 0.857158981 |
| miR-631     | 2.649698676 | 1.542424361 | 1.046099432 | 0.768803905 |
| miR-1200    | 1.258108545 | 0.74122068  | 0.869967233 | 0.931744434 |
| miR-141*    | 0.858469671 | 1.022118943 | 1.021047962 | 0.91223747  |
| miR-769-5p  | 1.45131883  | 0.746739795 | 0.983589925 | 0.983380517 |
| miR-151-3p  | 1.167298671 | 0.81351664  | 0.637297326 | 0.886419428 |
| miR-31      | 1.157618413 | 0.90286246  | 0.790864288 | 0.926580826 |
| miR-654-5p  | 1.541957989 | 0.814944895 | 0.81568429  | 0.947235259 |
| miR-129-3p  | 1.427584192 | 0.826170489 | 0.71684698  | 0.851995373 |
| miR-218-2*  | 0.904604463 | 0.830074314 | 0.99031027  | 0.913958672 |
| miR-141     | 0.953299334 | 0.844992054 | 0.97711554  | 0.85027417  |
| miR-297     | 1.076077595 | 0.909535861 | 0.905013808 | 0.76134536  |
| let-7b*     | 1.047215117 | 0.890857736 | 0.626003603 | 0.799211821 |
| miR-1284    | 1.242695853 | 0.777571697 | 1.130397695 | 0.98911786  |
| miR-20a*    | 1.06043757  | 1.377311421 | 1.077954255 | 1.003461217 |
| miR-490-5p  | 1.141362397 | 1.069109194 | 0.999818383 | 0.900762784 |
| miR-484     | 0.841657205 | 0.876427233 | 1.079247662 | 0.963873553 |
| miR-617     | 1.582193025 | 1.119519216 | 0.689069107 | 0.874944743 |
| miR-494     | 1.451783314 | 0.796329911 | 0.53603543  | 0.781999793 |
| miR-513a-3p | 1.176473607 | 1.252541835 | 0.852244312 | 0.851995373 |
| miR-486-3p  | 1.414790489 | 0.637306289 | 0.838990234 | 0.821587457 |
| miR-521     | 1.169056735 | 0.878759511 | 0.912986532 | 0.895025442 |
| miR-1277    | 0.979210394 | 0.81163289  | 0.930616625 | 0.938055511 |
| miR-107     | 1.450469986 | 0.886624968 | 0.61583044  | 0.860027652 |
| miR-215     | 1.317075184 | 0.963691364 | 0.806843848 | 0.733806115 |
| miR-29a     | 0.98436998  | 1.205849642 | 1.652038771 | 0.90420519  |
| miR-92b     | 0.894097243 | 1.303887089 | 0.935604149 | 0.944940322 |
| miR-649     | 0.996509793 | 1.475011515 | 1.013038958 | 1.000592545 |
| miR-302b*   | 0.918148585 | 0.961078141 | 0.95270422  | 0.928875763 |
| miR-1226    | 1.147503904 | 1.035379893 | 0.965642605 | 0.880108351 |
| miR-92a-2*  | 0.969152844 | 0.927963378 | 0.904490784 | 0.933465637 |
| miR-150*    | 1.049063669 | 0.817761681 | 0.957013372 | 0.891583036 |
| miR-1205    | 0.945566689 | 0.804977943 | 0.566429622 | 0.768230171 |
| miR-106a    | 1.505289959 | 0.591180467 | 0.812280084 | 0.986822923 |
| miR-122*    | 0.854424828 | 1.131647095 | 0.89965049  | 0.948956462 |
| miR-885-3p  | 1.793032774 | 0.728208505 | 0.718191702 | 0.692497249 |
| miR-143     | 1.144205833 | 0.87557764  | 0.890405732 | 0.948956462 |
| miR-532-3p  | 1.656414086 | 1.112374207 | 0.83061948  | 0.829619736 |
| miR-26b*    | 1.291611634 | 0.910868799 | 0.903384132 | 0.892730505 |
| miR-30d     | 1.165735759 | 0.962604137 | 0.86396847  | 0.951251399 |
| miR-518b    | 0.985895954 | 0.924160435 | 0.742192395 | 0.932318169 |
| miR-493*    | 1.142356786 | 0.812906922 | 0.775050088 | 0.911090001 |

|             |             |             |             |             |
|-------------|-------------|-------------|-------------|-------------|
| miR-1197    | 0.960894877 | 0.742985753 | 0.671262885 | 0.964447287 |
| miR-371-3p  | 0.89459657  | 0.647293325 | 1.175544865 | 0.911090001 |
| miR-1292    | 1.333983837 | 0.829649581 | 0.824196962 | 0.952972602 |
| miR-593*    | 2.32281912  | 0.691658105 | 0.729707167 | 0.795195681 |
| miR-1291    | 1.400195925 | 0.889095332 | 0.913916736 | 0.86519126  |
| miR-125b-2* | 1.026903739 | 0.658321791 | 0.914381043 | 0.880682085 |
| miR-1293    | 2.020130094 | 0.649007562 | 0.529192987 | 0.582914006 |
| let-7d*     | 1.150439723 | 1.015648933 | 0.578377063 | 0.76134536  |
| miR-492     | 1.511561725 | 0.846404992 | 0.822733819 | 0.844536827 |
| miR-499-3p  | 2.50616661  | 1.097840632 | 0.587048748 | 0.770525108 |
| miR-504     | 1.204210426 | 0.996864344 | 0.744088909 | 0.81126024  |
| miR-488     | 2.537434978 | 0.614388444 | 0.786312036 | 0.808965303 |
| miR-191*    | 0.986014388 | 1.08519838  | 0.816458051 | 0.973627035 |
| miR-1304    | 1.177775731 | 0.874023781 | 0.977709137 | 0.821013723 |
| miR-1279    | 0.966519276 | 1.254114997 | 1.085740656 | 0.983954252 |
| miR-920     | 1.224126828 | 0.735577914 | 0.893055818 | 0.930023232 |
| miR-550     | 1.477101745 | 0.835867426 | 0.901685222 | 0.770525108 |
| miR-205*    | 1.123921788 | 0.901031657 | 0.573728218 | 0.478207504 |
| miR-23b     | 1.130123988 | 0.891594654 | 1.021516407 | 0.931744434 |
| miR-202     | 1.814452272 | 0.800766145 | 0.555358809 | 0.73839599  |
| miR-187*    | 0.857286425 | 0.829302433 | 0.713428414 | 0.940924182 |
| miR-132*    | 1.298413157 | 0.811237405 | 0.890103121 | 0.799211821 |
| miR-135b*   | 1.383547233 | 0.851098842 | 0.778742683 | 0.90018905  |
| miR-342-3p  | 1.159627779 | 0.859165625 | 0.934171479 | 0.966742224 |
| miR-2110    | 1.222481186 | 0.732441206 | 0.73141942  | 0.847979233 |
| let-7a-2*   | 1.188786725 | 0.810638508 | 0.699333482 | 0.886993162 |
| miR-657     | 1.022834678 | 0.973417465 | 0.944480533 | 0.769951374 |
| miR-124*    | 1.111695071 | 0.718845069 | 0.83851646  | 0.871502337 |
| miR-524-5p  | 1.221688679 | 1.034172765 | 0.721670763 | 0.820439988 |
| miR-127-3p  | 1.153811498 | 0.909648632 | 0.955400158 | 0.896746645 |
| miR-21*     | 1.442032235 | 0.86911865  | 0.648565161 | 0.739543458 |
| miR-29b-1*  | 1.368302437 | 0.963701203 | 0.861426918 | 0.923712155 |
| miR-99b     | 1.138878113 | 1.645372937 | 0.701350914 | 0.899615316 |
| miR-1914*   | 1.176473607 | 1.011877087 | 0.993524692 | 0.991986531 |
| miR-597     | 1.573584024 | 0.81586557  | 0.998190653 | 0.916253609 |
| miR-100*    | 1.198171419 | 0.979519728 | 0.920879816 | 0.98510172  |
| miR-891b    | 1.506497799 | 0.793357394 | 0.544661395 | 0.823882394 |
| miR-609     | 1.189137163 | 0.905178654 | 0.748639281 | 0.903631456 |
| miR-516b    | 1.2700079   | 0.812189386 | 0.524514576 | 0.858880184 |
| miR-542-3p  | 1.312541143 | 0.897395612 | 0.722274232 | 0.874944743 |
| miR-1911    | 1.020654042 | 0.830742482 | 0.818273341 | 0.942645385 |
| miR-186     | 1.078011077 | 1.176041938 | 0.927817324 | 0.926007092 |
| miR-103     | 1.47327368  | 0.952446466 | 0.69771454  | 0.870928603 |
| miR-1182    | 1.028340958 | 0.942297539 | 0.865385932 | 0.921990952 |
| miR-152     | 0.652372666 | 0.976604351 | 1.091869454 | 1.002887482 |
| miR-432     | 0.99710654  | 0.911220904 | 0.967516538 | 0.956988742 |
| miR-199a-3p | 0.864942858 | 1.160469732 | 0.731997678 | 0.788884604 |

|             |             |             |             |             |
|-------------|-------------|-------------|-------------|-------------|
| miR-491-5p  | 1.73733172  | 0.767197603 | 0.787722632 | 0.794048212 |
| miR-29b-2*  | 1.000272156 | 0.829616056 | 0.728136743 | 0.891009302 |
| let-7f-2*   | 0.933832325 | 0.96582547  | 0.770208275 | 0.867486197 |
| miR-302c*   | 0.791417439 | 0.85599439  | 1.00582566  | 0.963873553 |
| miR-1245    | 1.946210994 | 0.594380139 | 0.813578934 | 0.849126701 |
| miR-579     | 1.174967592 | 1.063352976 | 0.571071224 | 0.775114982 |
| miR-765     | 0.957391869 | 0.950441479 | 1.174479442 | 0.798064352 |
| miR-1269    | 1.684440993 | 0.808147369 | 0.738724658 | 0.891009302 |
| miR-182*    | 1.512117512 | 0.961673806 | 0.916551438 | 0.759624157 |
| miR-1180    | 1.051404322 | 0.948412881 | 0.898196958 | 0.870928603 |
| miR-369-5p  | 1.24798073  | 0.796005745 | 0.699581451 | 0.892730505 |
| miR-654-3p  | 1.710692301 | 0.988031549 | 0.620682063 | 0.779704856 |
| miR-105*    | 1.214230584 | 0.659011261 | 0.902728468 | 0.853142841 |
| miR-1246    | 1.153031357 | 0.875190112 | 0.843818546 | 0.901910253 |
| miR-122     | 1.029828771 | 0.732469277 | 0.780105129 | 0.981659315 |
| miR-200b*   | 1.052131884 | 1.133447314 | 1.037400943 | 0.876665946 |
| miR-566     | 1.227505203 | 0.712675224 | 0.770271451 | 0.888714365 |
| miR-7-2*    | 0.926101497 | 0.841312224 | 0.7954877   | 0.882977022 |
| miR-1229    | 0.894718113 | 0.93382317  | 0.989968743 | 0.938055511 |
| miR-632     | 1.296052268 | 0.9575125   | 1.083541069 | 0.775688716 |
| miR-330-5p  | 1.018328013 | 0.863794867 | 0.859378358 | 0.884698225 |
| miR-614     | 1.013965732 | 0.93795969  | 0.756682114 | 0.919696015 |
| miR-518e    | 1.075412552 | 0.785494915 | 0.680468848 | 0.933465637 |
| miR-432*    | 1.409372578 | 0.621381041 | 0.320579856 | 0.589225083 |
| miR-513a-5p | 2.132514417 | 0.746990574 | 0.856886687 | 0.810686506 |
| miR-574-3p  | 1.130373412 | 1.022206179 | 1.188067708 | 0.965021021 |
| miR-548l    | 1.216947385 | 0.939333077 | 0.984768035 | 0.915106141 |
| miR-103-as  | 1.309700774 | 0.875814022 | 0.43250977  | 0.52955672  |
| miR-1259    | 2.235161901 | 0.866137695 | 0.685602677 | 0.695939654 |
| miR-93      | 1.1225641   | 0.834635838 | 0.806761399 | 0.913384938 |
| miR-1281    | 2.125463501 | 0.835381671 | 0.623363405 | 0.836504548 |
| miR-596     | 0.89154571  | 0.885964681 | 0.899847016 | 0.913384938 |
| miR-101*    | 1.618257232 | 0.87332632  | 0.672673934 | 0.561226851 |
| miR-200b    | 1.088318533 | 1.344643703 | 0.962801536 | 0.66036813  |
| miR-526b    | 1.565060032 | 1.057740126 | 0.685749994 | 0.778557388 |
| miR-29a*    | 1.070757581 | 0.834730168 | 0.812854771 | 1.002887482 |
| miR-1975    | 0.950177422 | 0.892654557 | 1.050537768 | 0.991412797 |
| miR-1208    | 1.244540054 | 1.013936235 | 0.929042557 | 0.755608017 |
| miR-373*    | 0.980590943 | 0.788576936 | 0.907067461 | 0.901910253 |
| miR-509-3p  | 1.512882601 | 0.548178247 | 0.958926778 | 0.731511178 |
| miR-140-5p  | 0.967763046 | 1.231259087 | 0.8879107   | 0.854864044 |
| miR-641     | 1.313986146 | 0.992095406 | 0.92399685  | 0.980511846 |
| miR-224*    | 1.009420383 | 0.588344585 | 0.485724266 | 0.692497249 |
| miR-1910    | 0.823830744 | 1.170756983 | 0.794186409 | 0.994855203 |
| miR-377     | 0.997147899 | 0.810946178 | 1.088894958 | 0.965594756 |
| miR-1287    | 1.061086099 | 0.720256884 | 0.811491655 | 0.854864044 |
| miR-30c-1*  | 1.395920958 | 0.630253554 | 0.923494485 | 0.659794396 |

|             |             |             |             |             |
|-------------|-------------|-------------|-------------|-------------|
| miR-422a    | 1.52524948  | 0.738668739 | 0.752265761 | 0.816423849 |
| miR-451     | 1.193851459 | 0.958507954 | 1.125936607 | 0.916253609 |
| miR-205     | 1.094680518 | 0.771621423 | 0.781594083 | 0.838799485 |
| miR-767-5p  | 1.548291656 | 0.773322582 | 0.898084037 | 0.760771626 |
| miR-188-3p  | 1.456073581 | 0.927727603 | 0.775228813 | 0.843389359 |
| miR-643     | 1.057182931 | 0.833404668 | 0.995849681 | 0.916827344 |
| miR-346     | 1.414746737 | 0.847090891 | 0.968014334 | 0.755608017 |
| miR-1294    | 1.347400976 | 0.527647147 | 0.920799523 | 0.560997357 |
| miR-608     | 1.202953075 | 0.716397545 | 0.848146209 | 0.781999793 |
| miR-374b*   | 1.109842406 | 1.01243506  | 0.862543867 | 0.893304239 |
| miR-27b*    | 1.341915995 | 0.69530582  | 0.77570608  | 0.917974812 |
| miR-634     | 2.012599317 | 0.965895685 | 0.742775092 | 0.549006311 |
| miR-1203    | 0.97498726  | 0.975341326 | 0.99459252  | 0.963299818 |
| miR-936     | 1.136059704 | 0.878557406 | 0.900994147 | 0.867486197 |
| miR-130a*   | 1.170388829 | 0.976024591 | 1.116659324 | 0.950677665 |
| miR-639     | 0.921909529 | 0.730622541 | 0.987882768 | 0.976495706 |
| miR-937     | 0.828952109 | 0.794724809 | 0.992156695 | 0.98510172  |
| miR-1307    | 1.287635331 | 0.746467772 | 1.208874936 | 0.865764995 |
| miR-892a    | 1.26302944  | 0.878245993 | 0.929533326 | 0.818718786 |
| miR-200a    | 1.176473607 | 0.77866523  | 1.014430384 | 0.734953584 |
| miR-523     | 1.056977221 | 0.947598426 | 1.018782741 | 0.939776714 |
| miR-1265    | 1.017685978 | 0.681016053 | 1.164098656 | 0.849126701 |
| miR-18b*    | 0.970277485 | 1.021246412 | 1.142048655 | 0.947235259 |
| miR-372     | 1.001010135 | 0.901938044 | 0.829257716 | 0.913958672 |
| miR-222*    | 0.904560593 | 1.149758317 | 0.713207615 | 0.730937444 |
| miR-103-2*  | 0.944854077 | 0.783716126 | 0.872969918 | 0.898467847 |
| miR-30d*    | 0.735974252 | 1.046936769 | 0.824549986 | 0.828472268 |
| miR-361-3p  | 1.161028652 | 0.990415031 | 1.091400088 | 0.95813621  |
| miR-548h    | 1.0376583   | 0.969312279 | 0.903903131 | 0.920843483 |
| miR-138     | 1.176473607 | 0.651497385 | 0.765869465 | 0.939776714 |
| miR-548a-5p | 0.859655947 | 1.1456234   | 0.974728452 | 0.955267539 |
| miR-591     | 1.026628557 | 1.077416532 | 1.127002521 | 0.838799485 |
| miR-548j    | 0.982448668 | 1.069902636 | 0.894274445 | 0.939776714 |
| miR-548m    | 0.9856563   | 0.875141223 | 0.897106334 | 0.805522898 |
| miR-220c    | 0.905009333 | 0.904419056 | 0.756649384 | 0.713151682 |
| miR-548k    | 1.294549015 | 0.831828954 | 0.763871187 | 0.795195681 |
| miR-663     | 1.412413168 | 0.874502981 | 0.946664192 | 0.910516267 |
| miR-299-5p  | 1.358720475 | 0.954935874 | 1.011105524 | 0.901910253 |
| miR-134     | 1.636503827 | 0.926336486 | 1.100489268 | 0.885845694 |
| miR-545*    | 0.962150791 | 0.990330883 | 1.017548158 | 0.93518684  |
| miR-200a*   | 1.043028754 | 1.030194205 | 1.144724233 | 0.879534617 |
| miR-875-3p  | 1.196491722 | 1.070979196 | 1.040729464 | 0.915679875 |
| miR-769-3p  | 1.156046861 | 0.962155053 | 1.136760532 | 0.905926393 |
| miR-129*    | 1.255854149 | 0.847659192 | 0.835022911 | 0.829046002 |
| miR-1257    | 1.383694266 | 1.159663668 | 0.736863095 | 0.864617526 |
| miR-1244    | 1.124157325 | 1.100439193 | 0.888894051 | 0.729216241 |
| miR-143*    | 1.200240441 | 0.819676211 | 1.191335746 | 0.964447287 |

|              |             |             |             |             |
|--------------|-------------|-------------|-------------|-------------|
| miR-196b     | 0.966273467 | 0.819514052 | 0.839075957 | 0.766508968 |
| miR-22       | 1.140293756 | 0.918185479 | 0.897584344 | 0.87723968  |
| miR-203      | 1.459854883 | 0.894708394 | 0.798007261 | 0.930596966 |
| miR-29b      | 1.209055954 | 1.106901279 | 1.1703129   | 0.899041582 |
| miR-588      | 1.090961593 | 0.99210973  | 1.001414966 | 0.901336519 |
| miR-362-5p   | 1.074716973 | 1.191662053 | 1.018475132 | 0.899615316 |
| miR-628-3p   | 1.061492501 | 0.956952132 | 0.936534375 | 0.90420519  |
| miR-517b     | 1.041292613 | 0.77627685  | 1.194977409 | 0.933465637 |
| miR-605      | 1.25562569  | 1.031472367 | 0.752354757 | 0.911090001 |
| miR-26a-1*   | 1.029751078 | 0.969925758 | 0.774310686 | 0.906500127 |
| miR-558      | 1.645389854 | 0.67841816  | 0.779501265 | 0.849126701 |
| miR-660      | 1.6791756   | 0.884105038 | 1.033650459 | 0.751591877 |
| miR-612      | 1.576613439 | 0.800653681 | 0.822167146 | 0.754460549 |
| miR-155      | 1.176473607 | 0.939180676 | 0.925290715 | 0.839373219 |
| miR-219-1-3p | 2.060722525 | 0.840996178 | 0.572650587 | 0.531851657 |
| miR-1911*    | 1.201405075 | 0.860532254 | 0.851190982 | 0.88125582  |
| miR-191      | 1.449218846 | 0.923505195 | 0.802850256 | 0.847405498 |
| miR-454*     | 1.12809992  | 1.05280111  | 0.942667237 | 0.947808994 |
| miR-520c-3p  | 0.92099616  | 0.936003282 | 0.77317117  | 0.937481777 |
| miR-125a-5p  | 1.100986142 | 1.105303596 | 1.147691214 | 1.01206723  |
| miR-449b*    | 1.183497204 | 0.798939224 | 0.981096248 | 0.840520687 |
| miR-501-3p   | 1.462737155 | 0.819444596 | 0.691472246 | 0.728642507 |
| miR-767-3p   | 1.058528914 | 0.939052976 | 1.189831597 | 0.930596966 |
| miR-452      | 1.109273147 | 0.926640889 | 1.049006069 | 0.986822923 |
| miR-208a     | 1.210749949 | 1.252086726 | 0.943548612 | 1.029279258 |
| let-7a       | 1.011092277 | 0.791988375 | 0.797359155 | 0.78831087  |
| miR-514      | 0.990699536 | 1.253338629 | 1.168256085 | 0.984527986 |
| miR-221      | 0.925484679 | 0.905315969 | 0.811946862 | 0.934039371 |
| miR-877*     | 0.975239601 | 0.866864335 | 0.746758923 | 0.811833974 |
| miR-339-3p   | 0.988013517 | 0.975864727 | 0.851252089 | 0.969037161 |
| miR-598      | 1.176473607 | 0.909804135 | 1.16181625  | 0.95813621  |
| miR-181b     | 1.266509716 | 1.028785272 | 1.091671034 | 0.884698225 |
| miR-1249     | 1.190688203 | 0.866860951 | 1.126077974 | 0.888714365 |
| let-7f       | 1.167529641 | 0.88168639  | 0.890804836 | 0.779131122 |
| miR-1185     | 1.171916699 | 0.638478313 | 1.1319368   | 0.694218452 |
| miR-142-3p   | 1.02353289  | 0.828430761 | 0.958550871 | 0.782573527 |
| miR-425*     | 1.248890276 | 0.730414832 | 1.194066501 | 0.983954252 |
| miR-216a     | 1.158104394 | 1.17828039  | 0.844468079 | 0.895025442 |
| miR-576-5p   | 1.505772479 | 0.932856393 | 0.60541223  | 0.822161191 |
| miR-214      | 2.855770971 | 0.872573646 | 0.579282579 | 0.685038704 |
| miR-582-3p   | 1.059290525 | 1.017599453 | 1.026441013 | 0.883550757 |
| miR-1207-3p  | 1.361836517 | 0.795633581 | 0.727797992 | 0.901336519 |
| miR-329      | 1.640544429 | 0.825382158 | 0.698212435 | 0.920843483 |
| miR-30c-2*   | 1.388380602 | 0.771865142 | 0.866419513 | 0.818145051 |
| miR-17*      | 1.365092694 | 0.831232005 | 0.82235251  | 0.950103931 |
| miR-25       | 0.890182129 | 1.44392291  | 0.986127672 | 0.959283679 |
| miR-1282     | 0.992310547 | 1.144119545 | 1.061859682 | 0.973627035 |

|              |             |             |             |             |
|--------------|-------------|-------------|-------------|-------------|
| miR-195*     | 1.218769784 | 0.821934293 | 0.78711017  | 0.961004881 |
| miR-571      | 1.427730587 | 0.795800611 | 0.596127667 | 0.724626367 |
| let-7g       | 1.019829756 | 0.784006844 | 0.814760097 | 0.803227961 |
| miR-1979     | 1.902975062 | 1.094045832 | 0.957510606 | 0.942645385 |
| miR-624*     | 1.54802545  | 0.594286031 | 0.805910424 | 0.598978565 |
| miR-7        | 1.494204683 | 1.073508671 | 0.904034407 | 0.667252942 |
| miR-374a     | 1.029878263 | 0.932843376 | 0.819978542 | 0.874944743 |
| miR-1302     | 1.228531285 | 0.839468055 | 1.026450032 | 0.923712155 |
| miR-627      | 1.448966961 | 0.734030944 | 0.698541735 | 0.849700435 |
| miR-328      | 1.252077459 | 0.979141161 | 0.972731534 | 0.880108351 |
| miR-1322     | 1.486988433 | 0.816321905 | 0.782241107 | 0.721183962 |
| miR-590-3p   | 0.854053267 | 1.252035364 | 0.971253938 | 0.969610895 |
| miR-302f     | 0.809809578 | 1.361056088 | 0.711227855 | 0.78027859  |
| miR-301a     | 0.948053321 | 0.991153664 | 1.034904694 | 1.073456796 |
| miR-196b*    | 1.332245172 | 0.90303263  | 0.75185212  | 0.87723968  |
| miR-31*      | 1.431141623 | 0.978465618 | 0.829259211 | 0.875518477 |
| miR-1258     | 1.119729639 | 0.996421235 | 1.263514868 | 0.947235259 |
| miR-223*     | 1.325660461 | 0.875471511 | 0.694146924 | 0.799785555 |
| miR-301b     | 0.91843992  | 0.950943855 | 1.011753976 | 1.026984321 |
| miR-106a*    | 1.154582363 | 1.080728638 | 0.861489925 | 0.770525108 |
| miR-671-5p   | 1.650030495 | 0.784006645 | 0.770617577 | 0.885845694 |
| miR-184      | 1.176473607 | 0.864501688 | 0.89020845  | 0.905352658 |
| miR-34a*     | 1.37724091  | 0.972677339 | 0.933723909 | 0.849126701 |
| let-7i*      | 1.392750689 | 0.743286024 | 1.152670421 | 0.963873553 |
| miR-28-3p    | 1.326217783 | 0.795407392 | 0.850309506 | 0.810686506 |
| miR-577      | 1.088399547 | 1.022247466 | 1.039408267 | 0.956988742 |
| miR-137      | 1.075934651 | 1.191873141 | 0.616096691 | 0.8072441   |
| miR-519e     | 0.897663137 | 0.793558459 | 1.265590985 | 0.891583036 |
| miR-768-3p   | 1.131386047 | 1.043229172 | 0.935991296 | 0.941497917 |
| miR-801      | 1.176473607 | 0.931682998 | 0.98096252  | 0.846831764 |
| miR-892b     | 2.1382074   | 0.881861319 | 0.384584439 | 0.565415111 |
| miR-18b      | 2.444240187 | 0.848828696 | 0.785249819 | 0.871502337 |
| miR-27a      | 1.529946658 | 1.010287227 | 1.000032098 | 0.91223747  |
| let-7c*      | 1.318482654 | 0.737524155 | 0.855334756 | 0.812407709 |
| miR-646      | 2.059096768 | 0.917733672 | 0.553055355 | 0.531392669 |
| miR-376c     | 1.36584148  | 1.004560118 | 0.74589901  | 0.853142841 |
| miR-219-2-3p | 1.389931638 | 1.222091875 | 0.746834649 | 0.824456128 |
| miR-206      | 1.513656408 | 1.00999971  | 0.7625165   | 0.827324799 |
| miR-1234     | 1.406432955 | 0.969888066 | 0.872515242 | 0.892730505 |
| miR-345      | 1.260592376 | 0.921315352 | 0.986786779 | 0.936908043 |
| miR-16-1*    | 1.557254044 | 0.87454888  | 0.792969497 | 0.804949163 |
| miR-744*     | 1.00021513  | 1.448998478 | 0.865684193 | 0.761919094 |
| miR-1247     | 1.09762413  | 1.015014204 | 1.060742853 | 0.932318169 |
| miR-1288     | 1.53685121  | 0.746002899 | 0.858248911 | 0.878387148 |
| miR-126      | 1.624266724 | 0.834877314 | 0.843395263 | 0.706266871 |
| miR-30b      | 1.244281914 | 1.034807927 | 0.874746341 | 0.956415007 |
| miR-515-5p   | 1.145217364 | 1.425967026 | 1.014854994 | 0.921417218 |

|             |             |             |             |             |
|-------------|-------------|-------------|-------------|-------------|
| miR-338-3p  | 1.390464196 | 1.172829616 | 0.985044124 | 0.892156771 |
| miR-516a-5p | 1.255569675 | 1.215991887 | 1.184887281 | 1.005756154 |
| miR-569     | 1.549562551 | 0.954590136 | 0.777962807 | 0.775688716 |
| miR-221*    | 1.764563373 | 0.888381511 | 0.511468363 | 0.596683628 |
| miR-30a*    | 0.771585276 | 1.152147177 | 1.014257986 | 0.841094422 |
| miR-1261    | 0.975426399 | 1.098352923 | 0.893595573 | 0.719462759 |
| miR-720     | 1.289942815 | 0.840211488 | 0.861926218 | 0.859453918 |
| miR-642     | 1.362265572 | 1.576469705 | 0.919845582 | 0.918548546 |
| miR-1255a   | 1.400495709 | 0.740033605 | 0.752195832 | 0.906500127 |
| miR-518d-3p | 0.990096517 | 0.93265311  | 0.855278799 | 0.92715456  |
| miR-601     | 1.085903597 | 0.896342281 | 0.927692516 | 0.938629245 |
| miR-23a*    | 1.220376465 | 0.830643629 | 1.034918086 | 0.904778924 |
| miR-548e    | 1.176473607 | 0.8322142   | 0.708118686 | 0.907647595 |
| miR-552     | 1.059169751 | 1.312273322 | 0.75743902  | 0.657499459 |
| miR-380     | 1.040744279 | 1.289600181 | 1.070158041 | 0.901336519 |
| miR-1537    | 1.049580796 | 1.136418399 | 1.091864354 | 0.998871342 |
| miR-760     | 1.258944908 | 0.754749781 | 0.967690225 | 0.924859623 |
| miR-550*    | 1.383490456 | 1.43017548  | 0.872197489 | 0.963299818 |
| miR-1321    | 1.267966969 | 0.740128385 | 1.11748701  | 0.874371009 |
| miR-1206    | 1.012369695 | 0.963091357 | 0.769645439 | 0.915106141 |
| miR-198     | 1.373077045 | 0.901415135 | 0.834676952 | 0.971332098 |
| miR-943     | 1.45184673  | 0.974550439 | 0.869696795 | 0.950103931 |
| miR-520a-5p | 1.491017414 | 0.740629186 | 0.638419582 | 0.769377639 |
| miR-133a    | 1.4335102   | 0.816248229 | 0.786299662 | 0.886993162 |
| miR-424*    | 1.692842919 | 0.859014709 | 0.588643159 | 0.866338729 |
| miR-1826    | 1.160521612 | 0.731101649 | 0.836486311 | 0.913958672 |
| miR-212     | 1.176473607 | 1.231360836 | 0.801562972 | 0.88125582  |
| miR-1225-5p | 1.175876814 | 0.962503036 | 0.789139495 | 1.006329888 |
| miR-616     | 1.109574349 | 0.815890911 | 0.750288247 | 0.953546336 |
| miR-181a    | 1.176473607 | 1.413159037 | 0.898606545 | 0.98510172  |
| miR-933     | 1.430175895 | 0.875164366 | 1.201619513 | 1.049933691 |
| miR-2052    | 0.936280615 | 0.969659634 | 1.041332369 | 1.120503005 |
| miR-543     | 1.097362535 | 0.74897663  | 0.758848488 | 0.907647595 |
| miR-23b*    | 1.581076387 | 0.778571357 | 0.945901891 | 0.864617526 |
| miR-524-3p  | 1.48660528  | 0.667063143 | 0.729605304 | 0.984527986 |
| miR-572     | 1.173059274 | 0.957968741 | 0.941235532 | 1.026410587 |
| miR-26a     | 1.473955611 | 0.971159539 | 0.784511519 | 0.959857413 |
| miR-193a-5p | 1.734553039 | 0.757349879 | 0.778862337 | 0.93518684  |
| miR-1469    | 1.262099267 | 0.96455111  | 0.918086243 | 0.937481777 |
| miR-450b-5p | 0.92435886  | 1.052162874 | 0.880014845 | 0.963873553 |
| miR-510     | 1.384409197 | 0.852371795 | 0.69197508  | 0.874371009 |
| miR-26a-2*  | 1.039099618 | 1.062979314 | 0.849919843 | 0.974200769 |
| miR-1909    | 1.702787298 | 0.804149848 | 0.901525425 | 0.921417218 |
| miR-186*    | 0.975809634 | 0.997967775 | 1.028150967 | 1.001166279 |
| miR-133b    | 1.464424839 | 1.003200517 | 0.919611053 | 0.885845694 |
| miR-511     | 1.09362222  | 1.082676664 | 1.117204429 | 0.934039371 |
| let-7i      | 1.027950983 | 0.756001324 | 0.851937515 | 0.824456128 |



|             |             |             |             |             |
|-------------|-------------|-------------|-------------|-------------|
| miR-181a*   | 1.071009797 | 0.9986198   | 1.150888408 | 1.018952041 |
| miR-613     | 1.360741925 | 1.105296371 | 0.736470773 | 0.717741556 |
| miR-148a    | 0.758368696 | 0.904179169 | 1.001689401 | 1.035016601 |
| miR-934     | 0.998123576 | 1.437836112 | 0.973623399 | 0.948956462 |
| miR-320d    | 1.311794725 | 1.000327898 | 0.809681846 | 0.998297608 |
| miR-411*    | 1.054755923 | 1.138748496 | 0.92233027  | 0.858306449 |
| miR-544     | 1.192571497 | 1.315772649 | 0.706612392 | 0.834783345 |
| miR-942     | 0.800607768 | 1.123639648 | 0.9004823   | 0.996576405 |
| miR-607     | 0.907956455 | 0.909245822 | 0.972969852 | 1.008051091 |
| miR-92a     | 1.05521737  | 1.354177254 | 1.001890537 | 0.990839063 |
| miR-922     | 1.376918477 | 1.022270957 | 1.019113741 | 0.973053301 |
| miR-520f    | 0.902057783 | 0.728703008 | 0.923442987 | 0.940924182 |
| miR-93*     | 1.10515833  | 0.823087176 | 0.84250239  | 0.917974812 |
| miR-183*    | 1.269392437 | 0.932565261 | 0.721453636 | 0.937481777 |
| miR-515-3p  | 0.763305245 | 0.693102815 | 1.092402114 | 0.918548546 |
| miR-1974    | 0.964384076 | 1.060440417 | 1.115689251 | 0.929449497 |
| miR-127-5p  | 1.1728789   | 0.883361713 | 0.688653994 | 0.913384938 |
| miR-204     | 1.184890463 | 1.228487346 | 1.003451628 | 0.932891903 |
| miR-512-5p  | 1.594041315 | 0.862707219 | 0.906905258 | 0.759050423 |
| miR-520e    | 0.88657975  | 0.979332001 | 0.791612512 | 0.998871342 |
| miR-890     | 0.855526014 | 0.809954212 | 0.843000306 | 0.90420519  |
| miR-449b    | 1.358250707 | 0.792775743 | 0.741408955 | 0.709135542 |
| miR-1471    | 1.016581555 | 0.957278451 | 0.944324707 | 0.996002671 |
| miR-181c*   | 1.308327991 | 1.03348365  | 1.028445003 | 0.865764995 |
| miR-192*    | 1.141422288 | 1.078109772 | 0.826270117 | 0.814702646 |
| miR-500*    | 1.345524412 | 0.933471698 | 0.76426641  | 0.799211821 |
| miR-33b     | 1.168416555 | 0.884584381 | 0.884352949 | 0.852569107 |
| miR-585     | 1.103879906 | 0.713260753 | 0.796040097 | 0.898467847 |
| miR-34b*    | 1.017350236 | 0.605112355 | 0.431635585 | 0.557325458 |
| miR-139-5p  | 1.127909082 | 0.988097512 | 0.989693661 | 1.035590335 |
| miR-564     | 1.49936657  | 0.860762206 | 0.940130297 | 0.896746645 |
| miR-873     | 1.04713432  | 0.910631141 | 0.84070941  | 1.011493496 |
| miR-1264    | 1.589082847 | 0.897766515 | 0.885878279 | 0.823882394 |
| miR-1273    | 1.266237653 | 0.77385959  | 0.758486572 | 0.939776714 |
| miR-570     | 0.962898821 | 0.983977336 | 0.752998536 | 0.897320379 |
| miR-874     | 1.039774914 | 1.102358255 | 1.027006951 | 0.947235259 |
| miR-454     | 0.998646252 | 0.863774259 | 0.931827829 | 1.054523565 |
| miR-148b*   | 1.249819407 | 0.685799466 | 0.71814946  | 0.93518684  |
| miR-517*    | 0.89172781  | 0.964016021 | 0.926173957 | 0.988544126 |
| miR-519a    | 1.005405072 | 0.88045843  | 0.692533124 | 1.031000461 |
| miR-1243    | 1.340584769 | 0.985157185 | 0.805768239 | 0.88125582  |
| miR-1179    | 1.176473607 | 1.051332658 | 0.715446894 | 0.95412007  |
| miR-629     | 1.37438457  | 0.673222482 | 0.702686993 | 0.884698225 |
| miR-1226*   | 0.970992126 | 0.937916735 | 0.896393538 | 1.044770083 |
| miR-95      | 1.310603047 | 0.950617463 | 0.678032321 | 0.926580826 |
| miR-548d-5p | 0.924623489 | 0.976474175 | 0.907015401 | 1.040180209 |
| miR-573     | 0.90554819  | 0.807438781 | 0.880893892 | 0.853716575 |

|             |             |             |             |             |
|-------------|-------------|-------------|-------------|-------------|
| miR-576-3p  | 0.978521221 | 1.137599326 | 0.759988319 | 0.853142841 |
| miR-125a-3p | 1.496992155 | 0.658151924 | 0.646524944 | 0.891009302 |
| miR-199b-5p | 0.809248606 | 0.996775864 | 0.810175609 | 1.028705524 |
| miR-584     | 1.161871859 | 0.845998445 | 0.65101423  | 0.790032073 |
| miR-590-5p  | 1.311572327 | 0.885636026 | 0.749410487 | 0.940924182 |
| miR-520d-3p | 0.999023091 | 0.908890103 | 0.802707422 | 0.942645385 |
| miR-1296    | 1.908607787 | 0.715012234 | 0.738843814 | 0.73437985  |
| miR-16      | 1.748598185 | 0.834213879 | 0.55843725  | 0.533056499 |
| miR-28-5p   | 1.091040492 | 1.081613545 | 1.298770087 | 0.791179541 |
| miR-487a    | 1.51736023  | 0.849253195 | 0.706349207 | 0.85429031  |
| miR-378*    | 1.518857995 | 0.659250671 | 0.860423958 | 0.769377639 |
| miR-183     | 1.94110866  | 0.692016013 | 0.782801187 | 0.622501669 |
| miR-219-5p  | 1.178856536 | 0.704834237 | 0.96472367  | 0.886419428 |
| miR-365*    | 1.041652684 | 0.779775564 | 1.038853284 | 0.991986531 |
| miR-628-5p  | 1.026721532 | 0.767614387 | 0.932468268 | 0.897320379 |
| miR-619     | 1.525518919 | 0.805633343 | 0.840429462 | 0.973627035 |
| miR-146a    | 1.8721373   | 0.658374866 | 0.642566329 | 0.886419428 |
| miR-1300    | 1.689297922 | 1.154418024 | 0.544874216 | 0.742985864 |
| miR-144*    | 0.923458799 | 1.171110054 | 0.951530786 | 0.850847904 |
| miR-483-5p  | 1.447993812 | 0.818294597 | 0.866633473 | 0.955267539 |
| miR-1233    | 1.222416709 | 0.744709989 | 0.742474368 | 0.90822133  |
| miR-1912    | 1.176473607 | 1.098550702 | 0.793164001 | 0.878960883 |
| miR-1202    | 1.277794541 | 0.81491995  | 0.871709514 | 0.90420519  |
| miR-10a*    | 1.690852302 | 0.793428332 | 0.708577306 | 0.79634315  |
| miR-600     | 1.063481337 | 0.939153757 | 0.758356019 | 0.845110561 |
| miR-138-2*  | 1.574907906 | 0.806988142 | 0.537462864 | 0.752165612 |
| miR-603     | 1.198736639 | 0.921357839 | 0.731354439 | 0.889288099 |
| miR-567     | 1.224943226 | 0.787447569 | 1.025396088 | 0.863470058 |
| miR-30c     | 1.128897174 | 0.982371901 | 0.850392255 | 0.964447287 |
| miR-1266    | 1.107831502 | 0.730464528 | 0.826187426 | 0.884698225 |
| miR-218-1*  | 1.398654214 | 0.904403283 | 1.099710176 | 0.855437778 |
| miR-335     | 0.917247069 | 0.800320652 | 0.865760742 | 0.986249189 |
| miR-1301    | 1.430153754 | 0.881975215 | 0.680965963 | 0.844536827 |
| let-7e      | 0.892860889 | 0.760980804 | 0.863584552 | 0.81126024  |
| miR-520b    | 0.810571363 | 0.987251171 | 0.875924524 | 0.950103931 |
| miR-498     | 0.977841933 | 0.872079925 | 1.014293933 | 0.972479567 |
| miR-27b     | 1.256059437 | 1.120774946 | 1.053946329 | 0.938629245 |
| miR-211     | 1.114010236 | 1.258073144 | 0.962408184 | 0.9311707   |
| miR-1272    | 1.305783166 | 1.064078388 | 0.780978344 | 0.826177331 |
| miR-130a    | 0.858931156 | 0.731358113 | 0.880058192 | 1.022968181 |
| miR-885-5p  | 1.176473607 | 1.008114253 | 0.828623963 | 0.865764995 |
| miR-300     | 0.815699116 | 1.010484726 | 1.010394886 | 1.032721664 |
| miR-330-3p  | 1.328682427 | 2.106322798 | 0.822772684 | 0.863470058 |
| miR-19b-1*  | 1.00099859  | 1.083769724 | 0.986764879 | 0.822161191 |
| miR-2053    | 0.720688236 | 1.060648264 | 0.878288801 | 0.921417218 |
| miR-505     | 1.4937873   | 1.013183216 | 0.758699231 | 0.878387148 |
| miR-1908    | 1.29183967  | 0.968689394 | 0.852513473 | 0.942071651 |

|            |             |             |             |             |
|------------|-------------|-------------|-------------|-------------|
| miR-323-5p | 3.09987698  | 0.87552657  | 0.55142806  | 0.786015933 |
| miR-489    | 1.143349755 | 1.142739204 | 1.033175181 | 0.784868464 |
| let-7f-1*  | 0.886602219 | 1.059175127 | 0.727731161 | 0.834783345 |
| miR-324-5p | 1.256019969 | 1.181424133 | 0.99461629  | 0.829619736 |
| miR-338-5p | 1.348654001 | 0.893153913 | 0.876973752 | 0.832488408 |
| miR-455-3p | 1.036675808 | 0.906893491 | 0.933002106 | 0.98911786  |
| miR-1181   | 0.900913885 | 0.973001933 | 0.964220097 | 1.001166279 |
| miR-574-5p | 1.035464791 | 0.611112303 | 0.805455395 | 0.901336519 |
| miR-766    | 1.041099191 | 0.923624506 | 1.196850966 | 0.87723968  |
| miR-938    | 1.428269479 | 0.967745179 | 0.709054703 | 0.876665946 |
| miR-147    | 1.727538776 | 0.485118149 | 0.331393675 | 0.637992494 |
| miR-423-5p | 1.074951465 | 0.807945681 | 0.995625833 | 0.956415007 |
| miR-1252   | 1.265279821 | 1.048391479 | 0.920975203 | 0.966742224 |
| miR-1278   | 0.982717392 | 0.904518153 | 0.755524085 | 0.861748855 |
| miR-652    | 1.028585003 | 0.883950612 | 1.023349064 | 0.944366588 |
| miR-675*   | 1.336840231 | 1.097706667 | 0.597812885 | 0.851995373 |
| miR-361-5p | 0.957095404 | 1.082820035 | 0.800616703 | 0.943219119 |
| miR-135a*  | 1.368091557 | 1.063614526 | 1.013189794 | 0.890435568 |
| miR-150    | 1.067474612 | 1.360466823 | 0.964240406 | 0.97018463  |
| miR-142-5p | 0.932890933 | 0.941145743 | 0.912690636 | 0.951825133 |
| miR-889    | 1.030496152 | 1.158426042 | 0.798215876 | 0.757902954 |
| miR-421    | 1.511799781 | 0.887748955 | 1.145469029 | 0.711430479 |
| miR-888*   | 3.005907093 | 0.936052087 | 0.566103544 | 0.69938206  |
| miR-10b*   | 1.436318681 | 0.673665195 | 0.716737781 | 0.861748855 |
| miR-302a   | 0.941061084 | 0.96376127  | 0.837653807 | 0.961578616 |
| miR-25*    | 2.24616471  | 0.734833784 | 0.700177096 | 0.790032073 |
| miR-139-3p | 1.119832673 | 0.841300065 | 0.805213357 | 0.975921972 |
| miR-491-3p | 1.332856887 | 0.790251281 | 0.298024006 | 0.667826676 |
| miR-581    | 0.98549158  | 0.844954133 | 1.027843361 | 0.990839063 |
| miR-1183   | 1.345012855 | 0.689446083 | 0.811057362 | 0.898467847 |
| miR-190b   | 0.811685472 | 0.814850726 | 0.879584844 | 0.886419428 |
| miR-449a   | 1.171765953 | 0.589683499 | 0.76770692  | 0.690776046 |
| miR-9*     | 2.411078471 | 0.750524878 | 0.5471146   | 0.864043792 |
| miR-129-5p | 1.457336035 | 0.878294103 | 0.638819772 | 0.957562476 |

Supplementary Figure 1
