# Supplementary material
Source: PubMed Central journal article supplement (PMC4753257)
Supplement: onc2014469x3.pdf [file onc2014469x3.pdf]

|                         | p27         | Myc         | Rb.pS807_S811 |                    | p27         |
|-------------------------|-------------|-------------|---------------|--------------------|-------------|
| MDA-MB-231_miR-124      | 2.010897397 | 0.680248783 | 0.59885258    | HeyA8_miR-124      | 2.362742599 |
| MDA-MB-231_miR-136*     | 1.226866412 | 1.061464978 | 0.732845149   | HeyA8_miR-136*     | 1.199525736 |
| MDA-MB-231_miR-147      | 1.676199782 | 0.589470395 | 0.474901363   | HeyA8_miR-147      | 1.390808182 |
| MDA-MB-231_miR-148b     | 0.906823179 | 0.841146208 | 0.979874286   | HeyA8_miR-148b     | 0.784009075 |
| MDA-MB-231_miR-150*     | 1.424714251 | 0.887947479 | 1.012575204   | HeyA8_miR-150*     | 1.149690553 |
| MDA-MB-231_miR-18a      | 2.616449702 | 0.618583602 | 0.665140136   | HeyA8_miR-18a      | 1.690608747 |
| MDA-MB-231_miR-20b      | 1.758994085 | 0.826685685 | 0.797623773   | HeyA8_miR-20b      | 1.359272603 |
| MDA-MB-231_miR-219-1-3p | 2.11934694  | 0.657630234 | 0.474113618   | HeyA8_miR-219-1-3p | 0.948193885 |
| MDA-MB-231_miR-34b*     | 0.973903349 | 0.633896851 | 0.532818729   | HeyA8_miR-34b*     | 0.700319566 |
| MDA-MB-231_miR-365      | 2.734901296 | 0.768927448 | 0.505452204   | HeyA8_miR-365      | 1.809595457 |
| MDA-MB-231_miR-373      | 1.17154434  | 0.952455353 | 0.92726692    | HeyA8_miR-373      | 1.070275657 |
| MDA-MB-231_miR-453      | 1.295607236 | 0.99604669  | 1.042153376   | HeyA8_miR-453      | 1.165594568 |
| MDA-MB-231_miR-486-3p   | 1.517934112 | 0.635695968 | 0.770908446   | HeyA8_miR-486-3p   | 1.040214021 |
| MDA-MB-231_miR-518a-5p  | 1.867754314 | 0.784372492 | 0.65527449    | HeyA8_miR-518a-5p  | 1.112777874 |
| MDA-MB-231_miR-519d     | 1.365764733 | 0.841373936 | 0.91494569    | HeyA8_miR-519d     | 1.142346929 |
| MDA-MB-231_miR-526b*    | 1.306413634 | 0.919931293 | 0.867414899   | HeyA8_miR-526b*    | 0.921504845 |
| MDA-MB-231_miR-555      | 2.653339828 | 0.590308654 | 0.6892418     | HeyA8_miR-555      | 2.38329544  |
| MDA-MB-231_miR-653      | 1.096073525 | 1.1514158   | 0.685417991   | HeyA8_miR-653      | 1.039997363 |
| MDA-MB-231_miR-665      | 1.260626065 | 0.934027446 | 0.741966465   | HeyA8_miR-665      | 0.92779527  |
| MDA-MB-231_miR-92a-2*   | 1.500170185 | 0.907068015 | 1.385313326   | HeyA8_miR-92a-2*   | 0.958282004 |
| MDA-MB-231_miR-101*     | 1.552864738 | 0.80371873  | 0.721740414   | HeyA8_miR-101*     | 1.379797317 |
| MDA-MB-231_miR-106a     | 1.350857167 | 0.82548935  | 0.895557039   | HeyA8_miR-106a     | 1.273749255 |
| MDA-MB-231_miR-126      | 1.327001361 | 0.834271607 | 0.851650555   | HeyA8_miR-126      | 1.432439166 |
| MDA-MB-231_miR-129-5p   | 1.437332884 | 0.797128302 | 0.701564268   | HeyA8_miR-129-5p   | 1.105014497 |
| MDA-MB-231_miR-147      | 1.754897126 | 0.569873689 | 0.487192819   | HeyA8_miR-147      | 1.366323968 |
| MDA-MB-231_miR-149*     | 1.746583674 | 0.570319295 | 0.6645322     | HeyA8_miR-149*     | 1.156914597 |
| MDA-MB-231_miR-181c*    | 1.322256848 | 1.003064166 | 1.00856924    | HeyA8_miR-181c*    | 1.168544388 |
| MDA-MB-231_miR-185*     | 1.422965402 | 0.783664874 | 0.935493557   | HeyA8_miR-185*     | 1.039686308 |
| MDA-MB-231_miR-193a-3p  | 2.612953732 | 0.789575738 | 0.484502109   | HeyA8_miR-193a-3p  | 1.814274391 |
| MDA-MB-231_miR-193b     | 2.33967386  | 0.765006465 | 0.512746448   | HeyA8_miR-193b     | 1.877035216 |
| MDA-MB-231_miR-224*     | 1.271062526 | 0.636055798 | 0.622113023   | HeyA8_miR-224*     | 1.006650464 |
| MDA-MB-231_miR-29a      | 1.379948306 | 0.983224839 | 1.096215973   | HeyA8_miR-29a      | 0.920475235 |
| MDA-MB-231_miR-421      | 1.545075491 | 1.028908017 | 1.152789167   | HeyA8_miR-421      | 0.852246868 |
| MDA-MB-231_miR-491-3p   | 1.502840564 | 0.788674788 | 0.529213379   | HeyA8_miR-491-3p   | 1.17809364  |
| MDA-MB-231_miR-506      | 1.561480723 | 0.712029773 | 0.746218553   | HeyA8_miR-506      | 1.387888502 |
| MDA-MB-231_miR-507      | 1.092022326 | 1.276461429 | 0.812536432   | HeyA8_miR-507      | 1.056060178 |
| MDA-MB-231_miR-552      | 0.886420873 | 1.231771313 | 0.839899299   | HeyA8_miR-552      | 0.759959275 |
| MDA-MB-231_miR-561      | 1.196095745 | 1.056917029 | 0.962370535   | HeyA8_miR-561      | 1.089494655 |
| MDA-MB-231_miR-876-3p   | 1.910705586 | 0.86516935  | 0.578981326   | HeyA8_miR-876-3p   | 1.084851686 |
| MDA-MB-231_miR-885-3p   | 1.650299168 | 0.662841938 | 0.797182823   | HeyA8_miR-885-3p   | 1.238848673 |
| MDA-MB-231_miR-924      | 1.919861028 | 0.641658653 | 0.575664576   | HeyA8_miR-924      | 0.796394941 |
| MDA-MB-231_miR-145      | 1.496519864 | 0.834340308 | 0.819532154   | HeyA8_miR-145      | 1.101973026 |
| MDA-MB-231_miR-146a     | 1.73586524  | 0.662654328 | 0.739593515   | HeyA8_miR-146a     | 1.161509074 |
| MDA-MB-231_miR-148a     | 0.888859113 | 0.826303946 | 1.195339304   | HeyA8_miR-148a     | 0.773100877 |
| MDA-MB-231_miR-17       | 1.34144929  | 0.868621632 | 0.892676383   | HeyA8_miR-17       | 1.075124016 |
| MDA-MB-231_miR-18b      | 2.160530503 | 0.688925753 | 0.766564115   | HeyA8_miR-18b      | 1.421031227 |
| MDA-MB-231_miR-19a      | 1.251024286 | 0.712828266 | 0.989347139   | HeyA8_miR-19a      | 1.017363294 |
| MDA-MB-231_miR-19b      | 1.298880766 | 0.688652875 | 0.978418516   | HeyA8_miR-19b      | 0.981430241 |
| MDA-MB-231_miR-205      | 1.037614511 | 0.767770966 | 0.869962716   | HeyA8_miR-205      | 0.823415366 |
| MDA-MB-231_miR-206      | 1.510446352 | 0.904489571 | 0.788239176   | HeyA8_miR-206      | 1.190640325 |
| MDA-MB-231_miR-20a      | 1.329595056 | 0.916279302 | 0.948079035   | HeyA8_miR-20a      | 1.241839013 |
| MDA-MB-231_miR-21       | 1.022158603 | 1.018447135 | 0.861695486   | HeyA8_miR-21       | 0.984687478 |
| MDA-MB-231_miR-214      | 1.712564354 | 0.926793692 | 0.822776055   | HeyA8_miR-214      | 1.01272445  |
| MDA-MB-231_miR-217      | 1.13850444  | 1.16736017  | 0.951362895   | HeyA8_miR-217      | 1.028621576 |
| MDA-MB-231_miR-22       | 1.12034271  | 0.943474445 | 0.887982279   | HeyA8_miR-22       | 0.887298713 |
| MDA-MB-231_miR-221      | 0.806922517 | 0.886469027 | 0.898097446   | HeyA8_miR-221      | 0.89395973  |
| MDA-MB-231_miR-222      | 0.854477457 | 0.853797496 | 0.873584773   | HeyA8_miR-222      | 0.472260681 |
| MDA-MB-231_miR-23b      | 1.292975122 | 0.928380336 | 0.988053294   | HeyA8_miR-23b      | 1.229618425 |
| MDA-MB-231_miR-24       | 0.857756541 | 0.86697124  | 1.082213721   | HeyA8_miR-24       | 0.623725008 |
| MDA-MB-231_miR-26a      | 1.308058778 | 1.128892299 | 0.880527262   | HeyA8_miR-26a      | 1.273702411 |
| MDA-MB-231_miR-29b      | 1.234517517 | 1.021036454 | 0.967487636   | HeyA8_miR-29b      | 1.0802002   |
| MDA-MB-231_miR-29c      | 1.189905879 | 1.009577054 | 1.087170522   | HeyA8_miR-29c      | 1.162833338 |

|                        |             |             |             |                   |             |
|------------------------|-------------|-------------|-------------|-------------------|-------------|
| MDA-MB-231_miR-335     | 0.968028736 | 0.935225355 | 0.797474943 | HeyA8_miR-335     | 0.914360658 |
| MDA-MB-231_miR-34a     | 1.26466074  | 0.639516655 | 0.86819444  | HeyA8_miR-34a     | 1.462693073 |
| MDA-MB-231_miR-34b     | 1.372150516 | 0.759937307 | 0.824729575 | HeyA8_miR-34b     | 1.202802212 |
| MDA-MB-231_miR-34c-5p  | 1.108763708 | 0.596206145 | 0.874276426 | HeyA8_miR-34c-5p  | 1.461776593 |
| MDA-MB-231_miR-372     | 1.122890445 | 0.974874463 | 0.888288079 | HeyA8_miR-372     | 1.278645663 |
| MDA-MB-231_miR-483-3p  | 1.148502865 | 1.310404099 | 0.886081712 | HeyA8_miR-483-3p  | 1.222234888 |
| MDA-MB-231_miR-494     | 1.278527158 | 0.639393361 | 0.535866721 | HeyA8_miR-494     | 1.546640716 |
| MDA-MB-231_miR-675     | 1.472172108 | 0.853158197 | 0.877779927 | HeyA8_miR-675     | 1.158284702 |
| MDA-MB-231_miR-7       | 1.420203425 | 0.851972754 | 0.85081575  | HeyA8_miR-7       | 1.389337621 |
| MDA-MB-231_miR-101     | 1.592768809 | 0.889790078 | 0.882817754 | HeyA8_miR-101     | 1.116289993 |
| MDA-MB-231_miR-103     | 1.380963447 | 0.932468428 | 0.753268487 | HeyA8_miR-103     | 1.25436491  |
| MDA-MB-231_miR-106b    | 1.446721121 | 0.900112618 | 0.913839095 | HeyA8_miR-106b    | 1.176183867 |
| MDA-MB-231_miR-107     | 1.486577806 | 0.92528491  | 0.797741459 | HeyA8_miR-107     | 1.276623183 |
| MDA-MB-231_miR-125a-5p | 1.078226307 | 1.041649728 | 1.078364836 | HeyA8_miR-125a-5p | 1.038210021 |
| MDA-MB-231_miR-136     | 1.168611708 | 0.904586859 | 0.975587079 | HeyA8_miR-136     | 0.788504488 |
| MDA-MB-231_miR-153     | 1.035280994 | 0.858612195 | 1.229576284 | HeyA8_miR-153     | 0.795866646 |
| MDA-MB-231_miR-15b     | 1.85895531  | 0.903195668 | 0.740107369 | HeyA8_miR-15b     | 1.519989019 |
| MDA-MB-231_miR-181b    | 1.20266609  | 1.046291239 | 0.963216362 | HeyA8_miR-181b    | 1.613243886 |
| MDA-MB-231_miR-190     | 0.907659232 | 0.910382214 | 0.981966016 | HeyA8_miR-190     | 1.060370509 |
| MDA-MB-231_miR-199b-5p | 0.925746536 | 1.03262285  | 0.864111595 | HeyA8_miR-199b-5p | 0.919524358 |
| MDA-MB-231_miR-218     | 0.871507705 | 0.787125757 | 1.235356312 | HeyA8_miR-218     | 0.833485594 |
| MDA-MB-231_miR-219-5p  | 1.245447833 | 0.708146627 | 0.954167318 | HeyA8_miR-219-5p  | 1.199779942 |
| MDA-MB-231_miR-30d     | 1.433234786 | 0.984070544 | 1.007320329 | HeyA8_miR-30d     | 1.161026968 |
| MDA-MB-231_miR-330-5p  | 1.256211861 | 0.945672996 | 1.026954328 | HeyA8_miR-330-5p  | 1.241263012 |
| MDA-MB-231_miR-429     | 0.937159966 | 0.988764124 | 1.167086876 | HeyA8_miR-429     | 1.183005421 |
| MDA-MB-231_miR-454     | 1.195647327 | 0.732458545 | 0.900305739 | HeyA8_miR-454     | 1.045997792 |
| MDA-MB-231_miR-455-5p  | 1.019153373 | 0.685577903 | 1.231619754 | HeyA8_miR-455-5p  | 0.995291773 |
| MDA-MB-231_miR-491-5p  | 1.574244525 | 0.652504499 | 0.597249955 | HeyA8_miR-491-5p  | 1.112216661 |
| MDA-MB-231_miR-505     | 1.318570475 | 1.002116762 | 0.883874466 | HeyA8_miR-505     | 0.937172597 |
| MDA-MB-231_miR-520b    | 0.93233711  | 1.09215875  | 0.962381093 | HeyA8_miR-520b    | 0.839193384 |
| MDA-MB-231_miR-539     | 1.062465638 | 0.769754764 | 0.858188445 | HeyA8_miR-539     | 1.253347846 |
| MDA-MB-231_miR-542-3p  | 1.225975369 | 1.05950443  | 0.711257808 | HeyA8_miR-542-3p  | 1.542049029 |
| MDA-MB-231_miR-874     | 1.126848818 | 1.089405088 | 1.063328049 | HeyA8_miR-874     | 0.959449619 |
| MDA-MB-231_miR-105*    | 1.158545783 | 0.589416101 | 0.847627543 | HeyA8_miR-105*    | 1.366099986 |
| MDA-MB-231_miR-106b*   | 1.524608167 | 0.980817809 | 0.859717833 | HeyA8_miR-106b*   | 1.079178451 |
| MDA-MB-231_miR-10b*    | 1.280868896 | 0.655517576 | 0.810290841 | HeyA8_miR-10b*    | 1.103857543 |
| MDA-MB-231_miR-1184    | 1.387441073 | 0.915970094 | 0.803096038 | HeyA8_miR-1184    | 1.281755849 |
| MDA-MB-231_miR-1185    | 1.133560656 | 0.680241508 | 1.169797806 | HeyA8_miR-1185    | 1.063861717 |
| MDA-MB-231_miR-1225-3p | 1.240875604 | 0.826856964 | 0.967689226 | HeyA8_miR-1225-3p | 1.026591655 |
| MDA-MB-231_miR-1245    | 1.584404256 | 0.648166564 | 0.910863356 | HeyA8_miR-1245    | 1.246851878 |
| MDA-MB-231_miR-125b-2* | 1.550715232 | 0.685614676 | 1.000500132 | HeyA8_miR-125b-2* | 1.101988995 |
| MDA-MB-231_miR-1285    | 1.272294033 | 0.921309861 | 1.053644474 | HeyA8_miR-1285    | 0.996148363 |
| MDA-MB-231_miR-1289    | 1.144157112 | 1.056338975 | 0.961550984 | HeyA8_miR-1289    | 1.067416961 |
| MDA-MB-231_miR-1299    | 1.420149895 | 0.922128318 | 0.835593608 | HeyA8_miR-1299    | 1.320700087 |
| MDA-MB-231_miR-151-3p  | 1.099256781 | 0.728160556 | 0.702407997 | HeyA8_miR-151-3p  | 1.086281753 |
| MDA-MB-231_miR-18a*    | 1.122519984 | 0.822116464 | 1.037110679 | HeyA8_miR-18a*    | 1.001518707 |
| MDA-MB-231_miR-1908    | 1.291169262 | 0.783480562 | 0.865737118 | HeyA8_miR-1908    | 1.147374821 |
| MDA-MB-231_miR-193b*   | 1.254467966 | 0.688618243 | 0.853976689 | HeyA8_miR-193b*   | 1.834685113 |
| MDA-MB-231_miR-195*    | 1.303287891 | 0.884717735 | 0.888511056 | HeyA8_miR-195*    | 1.045950348 |
| MDA-MB-231_miR-19b-1*  | 0.960757767 | 1.105020198 | 1.163832383 | HeyA8_miR-19b-1*  | 1.146672757 |
| MDA-MB-231_miR-208b    | 1.174772657 | 1.149403839 | 0.887044964 | HeyA8_miR-208b    | 1.48758295  |
| MDA-MB-231_miR-26a-1*  | 1.248223711 | 0.922214274 | 0.771141242 | HeyA8_miR-26a-1*  | 0.922284283 |
| MDA-MB-231_miR-29b-2*  | 1.213232013 | 0.963985409 | 0.836727684 | HeyA8_miR-29b-2*  | 1.002298321 |
| MDA-MB-231_miR-32*     | 1.00069392  | 0.922060575 | 0.826805234 | HeyA8_miR-32*     | 1.009885214 |
| MDA-MB-231_miR-33b*    | 0.905405372 | 0.680816394 | 1.140151532 | HeyA8_miR-33b*    | 0.64941491  |
| MDA-MB-231_miR-367*    | 0.938205427 | 0.63705838  | 1.056939776 | HeyA8_miR-367*    | 1.037753122 |
| MDA-MB-231_miR-374a*   | 0.919545754 | 0.821376114 | 0.947421486 | HeyA8_miR-374a*   | 0.928963952 |
| MDA-MB-231_miR-423-5p  | 1.14083986  | 0.690553819 | 0.932209795 | HeyA8_miR-423-5p  | 0.955357249 |
| MDA-MB-231_miR-432*    | 1.474618644 | 0.707737032 | 0.595964908 | HeyA8_miR-432*    | 1.910734103 |
| MDA-MB-231_miR-490-5p  | 1.059476272 | 0.964421858 | 0.927942116 | HeyA8_miR-490-5p  | 1.141075811 |
| MDA-MB-231_miR-515-3p  | 0.803147015 | 0.719978146 | 1.245372443 | HeyA8_miR-515-3p  | 0.727175304 |
| MDA-MB-231_miR-516b    | 1.393673389 | 0.917922203 | 0.574603513 | HeyA8_miR-516b    | 1.085225364 |
| MDA-MB-231_miR-518d-5p | 1.142768129 | 0.971154413 | 0.940649792 | HeyA8_miR-518d-5p | 1.0889579   |

|                       |             |             |             |                  |             |
|-----------------------|-------------|-------------|-------------|------------------|-------------|
| MDA-MB-231_miR-525-3p | 1.171195325 | 0.662324317 | 0.859693434 | HeyA8_miR-525-3p | 1.176219252 |
| MDA-MB-231_miR-567    | 1.26553439  | 0.788990574 | 1.117625033 | HeyA8_miR-567    | 1.625919709 |
| MDA-MB-231_miR-570    | 0.941118678 | 1.00421733  | 0.952977898 | HeyA8_miR-570    | 1.123928264 |
| MDA-MB-231_miR-582-5p | 1.146851152 | 0.902643051 | 0.788061175 | HeyA8_miR-582-5p | 0.800092985 |
| MDA-MB-231_miR-584    | 1.123732489 | 1.022920224 | 0.788963006 | HeyA8_miR-584    | 1.384447686 |
| MDA-MB-231_miR-601    | 0.929223067 | 0.91336617  | 0.991950523 | HeyA8_miR-601    | 0.917102676 |
| MDA-MB-231_miR-609    | 1.156818121 | 0.908066952 | 0.769119154 | HeyA8_miR-609    | 1.384713393 |
| MDA-MB-231_miR-615-3p | 1.164404458 | 0.823575786 | 0.927308448 | HeyA8_miR-615-3p | 1.051252861 |
| MDA-MB-231_miR-621    | 1.515982464 | 0.747984827 | 0.693083713 | HeyA8_miR-621    | 1.200851935 |
| MDA-MB-231_miR-624*   | 1.049639721 | 0.648728882 | 0.802470205 | HeyA8_miR-624*   | 0.944599045 |
| MDA-MB-231_miR-625    | 0.999773689 | 0.666767578 | 0.980773213 | HeyA8_miR-625    | 1.209742267 |
| MDA-MB-231_miR-629*   | 1.074574481 | 0.985978512 | 0.923953294 | HeyA8_miR-629*   | 0.786670131 |
| MDA-MB-231_miR-636    | 0.949481136 | 0.918265187 | 1.053502406 | HeyA8_miR-636    | 0.679212338 |
| MDA-MB-231_miR-637    | 1.192968573 | 0.908363589 | 0.962545288 | HeyA8_miR-637    | 1.007649571 |
| MDA-MB-231_miR-647    | 1.03745898  | 0.93048824  | 0.944129577 | HeyA8_miR-647    | 1.102739891 |
| MDA-MB-231_miR-654-3p | 1.667520758 | 0.969090897 | 0.738149834 | HeyA8_miR-654-3p | 1.527427246 |
| MDA-MB-231_miR-654-5p | 1.84452668  | 0.748677877 | 0.855526889 | HeyA8_miR-654-5p | 1.68496809  |
| MDA-MB-231_miR-658    | 1.235523315 | 0.826106154 | 0.859656587 | HeyA8_miR-658    | 0.992081422 |
| MDA-MB-231_miR-744    | 1.560280127 | 0.742928396 | 0.902589719 | HeyA8_miR-744    | 1.158925018 |
| MDA-MB-231_miR-760    | 0.949115181 | 0.78229982  | 0.99722888  | HeyA8_miR-760    | 0.90852158  |
| MDA-MB-231_miR-765    | 1.007093701 | 0.817327834 | 1.107462613 | HeyA8_miR-765    | 1.024754998 |
| MDA-MB-231_miR-770-5p | 1.396746041 | 0.893626902 | 0.966662014 | HeyA8_miR-770-5p | 1.329042969 |
| MDA-MB-231_miR-891a   | 1.210544752 | 0.885002182 | 0.893703224 | HeyA8_miR-891a   | 1.064749727 |
| MDA-MB-231_miR-892b   | 1.98472102  | 0.675801302 | 0.446714731 | HeyA8_miR-892b   | 1.769521596 |
| MDA-MB-231_miR-9*     | 1.896400496 | 0.766890592 | 0.708594556 | HeyA8_miR-9*     | 2.107048274 |
| MDA-MB-231_miR-93*    | 0.916763273 | 0.754339364 | 0.846022194 | HeyA8_miR-93*    | 1.371793264 |
| MDA-MB-231_miR-937    | 1.058658706 | 0.831737135 | 1.066903756 | HeyA8_miR-937    | 1.088554803 |
| MDA-MB-231_miR-938    | 1.595843524 | 0.805761396 | 0.74836571  | HeyA8_miR-938    | 1.010359805 |
| MDA-MB-231_miR-941    | 1.161066534 | 0.853071093 | 0.972853266 | HeyA8_miR-941    | 1.165114788 |
| MDA-MB-231_miR-942    | 0.777686199 | 0.981886921 | 0.937600218 | HeyA8_miR-942    | 0.772792608 |

Supplementary Figure 2

| Myc         | Rb.pS807_S811 | p27                    | Myc         | Rb.pS807_S811 |             |
|-------------|---------------|------------------------|-------------|---------------|-------------|
| 0.60900543  | 0.929952374   | SKOV3.ip1_miR-124      | 1.932264726 | 0.545602915   | 0.483517054 |
| 0.86307709  | 0.858523906   | SKOV3.ip1_miR-136*     | 0.615077748 | 0.8768927     | 0.828025742 |
| 0.708990085 | 0.483545336   | SKOV3.ip1_miR-147      | 1.052066496 | 0.854018786   | 0.448577669 |
| 0.918494359 | 1.554044489   | SKOV3.ip1_miR-148b     | 0.826091723 | 0.813309734   | 1.410699093 |
| 0.893474989 | 1.010086292   | SKOV3.ip1_miR-150*     | 1.045919825 | 0.772539093   | 0.895176829 |
| 0.674528876 | 0.693887887   | SKOV3.ip1_miR-18a      | 1.240787941 | 0.703477892   | 0.804406854 |
| 0.855418536 | 0.787564097   | SKOV3.ip1_miR-20b      | 0.987452531 | 0.895435393   | 0.872570869 |
| 0.972456283 | 0.978547497   | SKOV3.ip1_miR-219-1-3p | 1.316252142 | 0.814873157   | 0.560673367 |
| 0.763036401 | 0.854940924   | SKOV3.ip1_miR-34b*     | 0.890652568 | 0.804256388   | 0.644271422 |
| 0.746065986 | 0.910185719   | SKOV3.ip1_miR-365      | 1.017975163 | 0.763530393   | 0.643166237 |
| 0.718852235 | 0.842926332   | SKOV3.ip1_miR-373      | 0.854645651 | 0.890731342   | 1.104066553 |
| 1.190759142 | 0.933835578   | SKOV3.ip1_miR-453      | 1.143900441 | 0.886126652   | 0.987441298 |
| 0.869760425 | 1.009768994   | SKOV3.ip1_miR-486-3p   | 1.188042302 | 0.872695322   | 0.640513196 |
| 0.801634558 | 0.903853857   | SKOV3.ip1_miR-518a-5p  | 0.784129815 | 0.825593678   | 1.075140767 |
| 0.811690811 | 0.917616712   | SKOV3.ip1_miR-519d     | 1.033769386 | 0.90980985    | 0.83612946  |
| 0.935047354 | 0.949276669   | SKOV3.ip1_miR-526b*    | 0.977803309 | 0.938989392   | 0.885315034 |
| 0.776518517 | 0.751462076   | SKOV3.ip1_miR-555      | 1.564684006 | 0.872215679   | 0.706595355 |
| 0.917357672 | 1.003443754   | SKOV3.ip1_miR-653      | 1.089905962 | 0.911392303   | 0.903033092 |
| 0.983079048 | 1.051197289   | SKOV3.ip1_miR-665      | 0.952678374 | 0.897856169   | 0.846383187 |
| 0.806606845 | 0.793008935   | SKOV3.ip1_miR-92a-2*   | 0.962908107 | 1.134713151   | 0.972833623 |
| 0.86055997  | 1.022217686   | SKOV3.ip1_miR-101*     | 0.938443506 | 0.882368061   | 0.743994873 |
| 0.755445761 | 0.792885005   | SKOV3.ip1_miR-106a     | 0.801137954 | 0.800811042   | 0.913539785 |
| 1.179777512 | 1.09277414    | SKOV3.ip1_miR-126      | 1.047932166 | 0.848573938   | 0.89850572  |
| 0.822440251 | 0.869503662   | SKOV3.ip1_miR-129-5p   | 0.875393112 | 0.912923665   | 0.910860836 |
| 0.743947477 | 0.713070329   | SKOV3.ip1_miR-147      | 1.161162793 | 0.862072013   | 0.560588555 |
| 0.895408261 | 1.173984709   | SKOV3.ip1_miR-149*     | 1.382011959 | 0.988175835   | 0.886091048 |
| 0.905234052 | 1.032365366   | SKOV3.ip1_miR-181c*    | 0.942143706 | 0.933713654   | 1.114572662 |
| 0.676028089 | 1.052600146   | SKOV3.ip1_miR-185*     | 1.092108547 | 0.997567632   | 0.831922982 |
| 0.84177641  | 0.835520037   | SKOV3.ip1_miR-193a-3p  | 0.994108873 | 0.741862288   | 0.833020687 |
| 0.950741024 | 0.568792083   | SKOV3.ip1_miR-193b     | 1.175653409 | 0.82057396    | 0.776514593 |
| 0.736165951 | 0.825871483   | SKOV3.ip1_miR-224*     | 0.969711606 | 0.838790686   | 0.64750119  |
| 1.325258338 | 1.185887827   | SKOV3.ip1_miR-29a      | 1.032941765 | 0.737957284   | 0.991506492 |
| 1.032861051 | 1.686309929   | SKOV3.ip1_miR-421      | 0.884850498 | 1.035446321   | 1.325879506 |
| 0.984460802 | 0.635211972   | SKOV3.ip1_miR-491-3p   | 1.183833994 | 1.200959086   | 0.623880392 |
| 0.772395896 | 0.886496944   | SKOV3.ip1_miR-506      | 1.07927019  | 0.750076626   | 0.627695688 |
| 1.058718538 | 0.702763003   | SKOV3.ip1_miR-507      | 0.892337462 | 0.892349743   | 0.82148402  |
| 1.181174209 | 0.92664089    | SKOV3.ip1_miR-552      | 0.923423128 | 0.993301656   | 0.888611409 |
| 0.849200974 | 0.884126493   | SKOV3.ip1_miR-561      | 1.018178161 | 0.845381852   | 0.911854705 |
| 1.095763261 | 0.788319604   | SKOV3.ip1_miR-876-3p   | 1.517901292 | 1.099208999   | 0.613662494 |
| 0.825920737 | 0.593144017   | SKOV3.ip1_miR-885-3p   | 0.979345992 | 1.017472416   | 0.458642152 |
| 0.794446582 | 1.038286878   | SKOV3.ip1_miR-924      | 0.90884903  | 0.855152135   | 0.596620921 |
| 0.927393257 | 1.086849134   | SKOV3.ip1_miR-145      | 1.353688536 | 0.86966169    | 0.900442331 |
| 0.791474952 | 1.004472037   | SKOV3.ip1_miR-146a     | 1.123295558 | 0.915775014   | 0.790450215 |
| 0.920255646 | 1.506587035   | SKOV3.ip1_miR-148a     | 0.851241563 | 0.742767898   | 1.333092407 |
| 0.926689692 | 0.926603785   | SKOV3.ip1_miR-17       | 0.901348669 | 0.851188159   | 0.899561884 |
| 0.744496496 | 0.734020086   | SKOV3.ip1_miR-18b      | 1.187564774 | 0.750696737   | 0.818019147 |
| 0.832767732 | 1.051664288   | SKOV3.ip1_miR-19a      | 0.920933804 | 0.789058314   | 1.102886691 |
| 0.807071778 | 0.995555117   | SKOV3.ip1_miR-19b      | 0.926897219 | 0.728918801   | 1.03098663  |
| 0.847503673 | 0.803742494   | SKOV3.ip1_miR-205      | 0.833304437 | 0.911795499   | 1.020246626 |
| 0.889212461 | 0.636286085   | SKOV3.ip1_miR-206      | 0.868452927 | 0.687992305   | 0.790830992 |
| 0.879906083 | 0.831398866   | SKOV3.ip1_miR-20a      | 1.013265159 | 0.784556208   | 0.846512037 |
| 0.919246152 | 0.894312382   | SKOV3.ip1_miR-21       | 1.017118348 | 0.844112628   | 0.947757986 |
| 1.02425371  | 1.022319452   | SKOV3.ip1_miR-214      | 1.10055277  | 0.886999154   | 0.860502327 |
| 0.919207928 | 0.750636929   | SKOV3.ip1_miR-217      | 1.023315077 | 0.804593011   | 0.658355575 |
| 0.911239612 | 1.092804506   | SKOV3.ip1_miR-22       | 1.060031839 | 0.810514443   | 0.847957711 |
| 0.940388618 | 0.883537621   | SKOV3.ip1_miR-221      | 0.841089454 | 0.767311941   | 0.852813352 |
| 0.89029374  | 0.855044528   | SKOV3.ip1_miR-222      | 0.72871346  | 0.770894103   | 0.877935439 |
| 0.845975016 | 0.846909917   | SKOV3.ip1_miR-23b      | 0.888189001 | 0.938241553   | 1.038025749 |
| 0.964899487 | 1.257279708   | SKOV3.ip1_miR-24       | 0.959285678 | 0.958101342   | 1.223874    |
| 0.98796843  | 0.863800212   | SKOV3.ip1_miR-26a      | 1.332323522 | 0.902761646   | 0.862272114 |
| 1.089666827 | 1.123761697   | SKOV3.ip1_miR-29b      | 1.016948164 | 0.812063068   | 0.958587025 |
| 1.084898596 | 1.05613087    | SKOV3.ip1_miR-29c      | 0.919663291 | 0.781460398   | 1.014869402 |

|             |             |                       |             |             |             |
|-------------|-------------|-----------------------|-------------|-------------|-------------|
| 0.848989112 | 0.826687252 | SKOV3.ip1_miR-335     | 0.912097809 | 0.77292978  | 0.90666414  |
| 0.780317649 | 0.673320864 | SKOV3.ip1_miR-34a     | 0.934819403 | 0.857492668 | 0.722799809 |
| 0.917075149 | 0.879402203 | SKOV3.ip1_miR-34b     | 0.97762666  | 0.96113503  | 0.894222882 |
| 0.807225965 | 0.702088196 | SKOV3.ip1_miR-34c-5p  | 0.910147937 | 0.881880457 | 0.632578218 |
| 0.824071879 | 0.843787953 | SKOV3.ip1_miR-372     | 0.877633577 | 0.927677212 | 1.095733078 |
| 1.608523724 | 0.856844021 | SKOV3.ip1_miR-483-3p  | 0.804603322 | 0.88230466  | 0.956324278 |
| 0.697032012 | 0.52652096  | SKOV3.ip1_miR-494     | 1.013827169 | 0.836159786 | 0.684607808 |
| 1.129728922 | 0.717168056 | SKOV3.ip1_miR-675     | 0.931843069 | 0.997166319 | 0.994260446 |
| 1.021925567 | 0.812715316 | SKOV3.ip1_miR-7       | 1.206405975 | 0.74246552  | 0.905626701 |
| 0.943526484 | 1.116027985 | SKOV3.ip1_miR-101     | 0.934628277 | 1.097200561 | 0.97783375  |
| 0.883736345 | 0.78198422  | SKOV3.ip1_miR-103     | 0.990128507 | 0.944153389 | 0.854593377 |
| 0.939224601 | 0.826916844 | SKOV3.ip1_miR-106b    | 0.879064547 | 0.837603096 | 0.913055351 |
| 0.870551147 | 0.779563462 | SKOV3.ip1_miR-107     | 1.014758964 | 0.973547674 | 0.862744273 |
| 1.031776499 | 1.070258999 | SKOV3.ip1_miR-125a-5p | 0.992796913 | 1.194849879 | 0.947730187 |
| 0.946247293 | 1.113314031 | SKOV3.ip1_miR-136     | 0.918010826 | 1.040892702 | 1.110557407 |
| 0.790240377 | 0.996091581 | SKOV3.ip1_miR-153     | 0.880808978 | 0.929399765 | 1.15911817  |
| 1.105752099 | 0.894831657 | SKOV3.ip1_miR-15b     | 0.970937529 | 1.260539179 | 0.641296592 |
| 0.896739183 | 0.920668305 | SKOV3.ip1_miR-181b    | 0.995348521 | 1.058759054 | 1.029693284 |
| 0.946399706 | 0.806433923 | SKOV3.ip1_miR-190     | 0.80587903  | 1.099195258 | 0.862079126 |
| 0.944937042 | 0.927155675 | SKOV3.ip1_miR-199b-5p | 0.86171807  | 1.164820869 | 0.723684647 |
| 0.805529693 | 1.306787295 | SKOV3.ip1_miR-218     | 0.784318185 | 0.846414421 | 1.242322288 |
| 0.878046215 | 0.955393089 | SKOV3.ip1_miR-219-5p  | 1.40510476  | 0.787989276 | 0.95526652  |
| 1.015693772 | 0.967942699 | SKOV3.ip1_miR-30d     | 0.847710252 | 1.121334139 | 1.355853101 |
| 0.979840917 | 0.868836836 | SKOV3.ip1_miR-330-5p  | 1.072960245 | 0.958931474 | 0.924206047 |
| 0.804235174 | 0.889704901 | SKOV3.ip1_miR-429     | 1.037531167 | 1.089560794 | 1.186066118 |
| 0.795169433 | 0.995914842 | SKOV3.ip1_miR-454     | 0.900410152 | 0.940666174 | 1.003341675 |
| 0.848250719 | 1.457323722 | SKOV3.ip1_miR-455-5p  | 1.116446609 | 0.907995787 | 1.57099406  |
| 0.863254623 | 0.914680974 | SKOV3.ip1_miR-491-5p  | 1.159721501 | 0.98801098  | 0.735465866 |
| 1.112752522 | 1.024650543 | SKOV3.ip1_miR-505     | 0.889015035 | 1.02312188  | 0.785004877 |
| 1.016163951 | 0.917201481 | SKOV3.ip1_miR-520b    | 0.852452412 | 1.04963826  | 0.911387247 |
| 0.872105141 | 0.918420081 | SKOV3.ip1_miR-539     | 1.003126059 | 0.835758619 | 0.892681939 |
| 0.816527512 | 0.625882396 | SKOV3.ip1_miR-542-3p  | 1.083647562 | 1.247215178 | 0.784730764 |
| 1.200736997 | 1.343645498 | SKOV3.ip1_miR-874     | 0.933469015 | 0.883346116 | 1.120161583 |
| 0.711038089 | 0.868913051 | SKOV3.ip1_miR-105*    | 0.815269141 | 0.696816412 | 1.278245202 |
| 0.875742262 | 1.021304691 | SKOV3.ip1_miR-106b*   | 0.958370568 | 0.958695961 | 0.824103671 |
| 0.795787529 | 0.816968518 | SKOV3.ip1_miR-10b*    | 1.039994713 | 0.968147878 | 0.833633017 |
| 0.852129747 | 0.977142934 | SKOV3.ip1_miR-1184    | 0.919735821 | 1.091383392 | 1.090691499 |
| 0.702000511 | 1.133147267 | SKOV3.ip1_miR-1185    | 0.809664495 | 0.850812959 | 1.17931756  |
| 0.82131917  | 1.144384244 | SKOV3.ip1_miR-1225-3p | 0.917490821 | 1.008965308 | 1.045934744 |
| 0.689155227 | 0.766464926 | SKOV3.ip1_miR-1245    | 1.02377725  | 0.958405888 | 0.92767377  |
| 0.767865875 | 0.887629231 | SKOV3.ip1_miR-125b-2* | 1.000778883 | 0.97954938  | 0.95843891  |
| 1.032035404 | 1.067400901 | SKOV3.ip1_miR-1285    | 1.319210595 | 0.959617743 | 0.91436653  |
| 0.955084804 | 0.954983263 | SKOV3.ip1_miR-1289    | 0.909835482 | 0.958345051 | 1.054777856 |
| 1.059109932 | 0.945788501 | SKOV3.ip1_miR-1299    | 1.161648784 | 1.014072901 | 0.729059113 |
| 1.021565868 | 1.086163938 | SKOV3.ip1_miR-151-3p  | 1.016396576 | 1.009567285 | 0.83260331  |
| 0.93274957  | 1.366332326 | SKOV3.ip1_miR-18a*    | 1.223692911 | 0.872703018 | 1.017529044 |
| 0.958929477 | 0.65429223  | SKOV3.ip1_miR-1908    | 0.979916529 | 1.036471566 | 0.979577627 |
| 0.620996863 | 0.808375723 | SKOV3.ip1_miR-193b*   | 1.091038474 | 0.936024812 | 0.897787223 |
| 0.981656401 | 0.857409845 | SKOV3.ip1_miR-195*    | 0.826731421 | 0.97023113  | 1.058994544 |
| 0.819278938 | 0.872584765 | SKOV3.ip1_miR-19b-1*  | 0.916250841 | 0.900291512 | 1.333682184 |
| 1.279518905 | 0.795090699 | SKOV3.ip1_miR-208b    | 0.935639881 | 1.057208823 | 1.407735447 |
| 0.967907132 | 0.737054467 | SKOV3.ip1_miR-26a-1*  | 1.021421764 | 0.93803548  | 0.916203923 |
| 1.092599578 | 0.995627295 | SKOV3.ip1_miR-29b-2*  | 0.898289872 | 1.052920362 | 0.944251253 |
| 0.757673473 | 0.82449601  | SKOV3.ip1_miR-32*     | 0.822932823 | 1.159709177 | 0.926039807 |
| 0.968963696 | 1.621664664 | SKOV3.ip1_miR-33b*    | 1.016068153 | 0.762422342 | 1.17529038  |
| 0.623143817 | 0.818577158 | SKOV3.ip1_miR-367*    | 1.015957572 | 0.924176752 | 1.190529605 |
| 0.819558911 | 1.019096178 | SKOV3.ip1_miR-374a*   | 1.059719764 | 1.00234933  | 1.051335696 |
| 0.792455623 | 1.401388473 | SKOV3.ip1_miR-423-5p  | 1.099715033 | 0.807357182 | 0.945767094 |
| 0.64118578  | 0.659780686 | SKOV3.ip1_miR-432*    | 1.734566422 | 0.843183112 | 0.547503133 |
| 1.010992568 | 0.829308291 | SKOV3.ip1_miR-490-5p  | 0.982723797 | 1.037319456 | 1.088068843 |
| 0.987619908 | 1.803595921 | SKOV3.ip1_miR-515-3p  | 0.833821756 | 0.862498445 | 1.335933733 |
| 0.972624673 | 0.597525822 | SKOV3.ip1_miR-516b    | 1.089436557 | 1.091847977 | 0.654560327 |
| 1.034111339 | 1.000696344 | SKOV3.ip1_miR-518d-5p | 1.020713945 | 1.050966997 | 0.947110404 |

|             |             |                      |             |             |             |
|-------------|-------------|----------------------|-------------|-------------|-------------|
| 0.902892462 | 0.772440662 | SKOV3.ip1_miR-525-3p | 1.157460746 | 0.918349015 | 0.797173465 |
| 0.876066256 | 1.255858729 | SKOV3.ip1_miR-567    | 1.041540681 | 1.047551101 | 1.350440003 |
| 0.949276266 | 0.875450552 | SKOV3.ip1_miR-570    | 0.763083515 | 0.920840824 | 0.902890156 |
| 1.075300439 | 0.725681571 | SKOV3.ip1_miR-582-5p | 0.990546376 | 1.022100898 | 0.897303644 |
| 0.977989129 | 0.751894896 | SKOV3.ip1_miR-584    | 0.978419397 | 0.917572858 | 0.931228081 |
| 0.976165967 | 0.868464007 | SKOV3.ip1_miR-601    | 0.925950495 | 0.995202789 | 1.020964496 |
| 1.156135523 | 0.702369712 | SKOV3.ip1_miR-609    | 0.951098149 | 0.924890889 | 0.738719177 |
| 0.848387309 | 1.148102287 | SKOV3.ip1_miR-615-3p | 0.872251312 | 0.982466148 | 1.078898802 |
| 0.85339367  | 0.703501216 | SKOV3.ip1_miR-621    | 0.957348671 | 0.885292748 | 0.763357096 |
| 1.043627729 | 1.114886811 | SKOV3.ip1_miR-624*   | 0.974172941 | 1.340697984 | 0.819708212 |
| 0.702342291 | 0.96566077  | SKOV3.ip1_miR-625    | 1.556023828 | 0.8969      | 0.622342196 |
| 1.411379665 | 1.090190309 | SKOV3.ip1_miR-629*   | 1.237185272 | 2.579427799 | 0.840859151 |
| 0.859045082 | 0.936042072 | SKOV3.ip1_miR-636    | 0.785378151 | 0.60223394  | 1.098905919 |
| 0.945659284 | 1.385565689 | SKOV3.ip1_miR-637    | 0.831177088 | 1.327131316 | 0.955348005 |
| 1.46552676  | 0.928588956 | SKOV3.ip1_miR-647    | 0.893533328 | 0.92952181  | 1.174473032 |
| 0.983745572 | 0.795093539 | SKOV3.ip1_miR-654-3p | 0.953608697 | 0.89686344  | 0.946365194 |
| 0.735998543 | 0.738650803 | SKOV3.ip1_miR-654-5p | 1.109510704 | 0.999762381 | 0.909231986 |
| 0.918779249 | 0.951062307 | SKOV3.ip1_miR-658    | 0.959151171 | 0.881639298 | 1.010161473 |
| 1.288499702 | 1.013739041 | SKOV3.ip1_miR-744    | 1.011017672 | 1.066449152 | 1.151719739 |
| 1.025131489 | 1.232566442 | SKOV3.ip1_miR-760    | 0.962451756 | 1.035710996 | 1.138736577 |
| 0.844745251 | 1.926311454 | SKOV3.ip1_miR-765    | 0.963112283 | 1.006793503 | 1.444345764 |
| 1.02027803  | 0.912980988 | SKOV3.ip1_miR-770-5p | 1.154952203 | 1.041869643 | 0.789233418 |
| 0.911653915 | 0.924536362 | SKOV3.ip1_miR-891a   | 1.001894775 | 0.92972454  | 0.994557875 |
| 0.942737071 | 0.655246293 | SKOV3.ip1_miR-892b   | 1.346271251 | 0.813447783 | 0.62092478  |
| 1.018038634 | 0.526574284 | SKOV3.ip1_miR-9*     | 1.274941332 | 0.813250616 | 0.819380832 |
| 0.771280568 | 0.61534024  | SKOV3.ip1_miR-93*    | 1.011624068 | 0.802458586 | 0.814035759 |
| 1.010860193 | 1.05439866  | SKOV3.ip1_miR-937    | 0.84519346  | 1.015274775 | 1.111697454 |
| 1.190539738 | 1.146101418 | SKOV3.ip1_miR-938    | 0.991047303 | 1.237868869 | 0.707923132 |
| 1.022276106 | 0.982633746 | SKOV3.ip1_miR-941    | 1.071990553 | 0.970563479 | 1.045395688 |
| 1.089053603 | 0.839634282 | SKOV3.ip1_miR-942    | 0.854896413 | 1.006470583 | 0.931942623 |
