# Supplementary material
Source: PubMed Central journal article supplement (PMC4753257)
Supplement: onc2014469x4.pdf [file onc2014469x4.pdf]

|                               | MDA-MB-231 | HeyA8   | SKOV3.ip1 |
|-------------------------------|------------|---------|-----------|
| hsa-let-7a-5p                 | 3792.78    | 5312.14 | 6877.88   |
| hsa-let-7b-5p                 | 448.35     | 1042.17 | 3666.62   |
| hsa-let-7c                    | 88.93      | 88.21   | 330.19    |
| hsa-let-7d-5p                 | 223.8      | 78.41   | 102.51    |
| hsa-let-7e-5p                 | 214.17     | 173.15  | 384.4     |
| hsa-let-7f-5p                 | 235.66     | 95.56   | 127.15    |
| hsa-let-7g-5p                 | 2447.74    | 1315.78 | 2392.18   |
| hsa-let-7i-5p                 | 909.29     | 310.36  | 553.94    |
| hsa-miR-1                     | 7.41       | 9.8     | 8.87      |
| hsa-miR-100-5p                | 1865.26    | 4301.82 | 3122.55   |
| hsa-miR-101-3p                | 5.93       | 3.27    | 6.9       |
| hsa-miR-103a-3p               | 8.15       | 4.08    | 1.97      |
| hsa-miR-105-5p                | 14.08      | 6.53    | 5.91      |
| hsa-miR-106a-5p+hsa-miR-17-5p | 1618.49    | 1304.35 | 503.67    |
| hsa-miR-106b-5p               | 396.47     | 135.58  | 219.8     |
| hsa-miR-107                   | 156.37     | 35.12   | 110.39    |
| hsa-miR-10a-5p                | 35.57      | 120.88  | 411.02    |
| hsa-miR-10b-5p                | 11.12      | 30.22   | 120.25    |
| hsa-miR-1178                  | 5.19       | 5.72    | 3.94      |
| hsa-miR-1179                  | 5.93       | 4.08    | 2.96      |
| hsa-miR-1180                  | 51.87      | 26.95   | 35.48     |
| hsa-miR-1181                  | 0.74       | 8.98    | 6.9       |
| hsa-miR-1182                  | 8.89       | 5.72    | 6.9       |
| hsa-miR-1183                  | 20.75      | 21.24   | 18.73     |
| hsa-miR-1184                  | 5.93       | 4.08    | 5.91      |
| hsa-miR-1185-5p               | 8.89       | 8.17    | 4.93      |
| hsa-miR-1193                  | 9.63       | 3.27    | 2.96      |
| hsa-miR-1197                  | 7.41       | 13.88   | 10.84     |
| hsa-miR-1200                  | 5.19       | 7.35    | 4.93      |
| hsa-miR-1202                  | 7.41       | 4.9     | 12.81     |
| hsa-miR-1203                  | 5.93       | 7.35    | 8.87      |
| hsa-miR-1204                  | 4.45       | 1.63    | 5.91      |
| hsa-miR-1205                  | 8.15       | 8.17    | 9.86      |
| hsa-miR-1206                  | 14.08      | 8.98    | 10.84     |
| hsa-miR-1207-3p               | 4.45       | 8.98    | 1.97      |
| hsa-miR-1208                  | 1.48       | 0.82    | 4.93      |
| hsa-miR-122-5p                | 8.89       | 4.9     | 4.93      |
| hsa-miR-1224-3p               | 5.19       | 4.08    | 4.93      |
| hsa-miR-1224-5p               | 5.93       | 4.08    | 5.91      |
| hsa-miR-1225-3p               | 5.93       | 7.35    | 5.91      |
| hsa-miR-1225-5p               | 6.67       | 4.9     | 7.89      |
| hsa-miR-1226-3p               | 13.34      | 4.9     | 8.87      |
| hsa-miR-1227                  | 1.48       | 4.08    | 3.94      |
| hsa-miR-1228-3p               | 7.41       | 5.72    | 2.96      |
| hsa-miR-1229                  | 2.22       | 4.08    | 0.99      |
| hsa-miR-1231                  | 5.93       | 4.9     | 6.9       |

|                  |         |         |         |
|------------------|---------|---------|---------|
| hsa-miR-1233     | 7.41    | 3.27    | 3.94    |
| hsa-miR-1234     | 8.89    | 13.07   | 11.83   |
| hsa-miR-1236     | 4.45    | 6.53    | 3.94    |
| hsa-miR-1237     | 4.45    | 8.17    | 4.93    |
| hsa-miR-1238     | 11.12   | 4.9     | 7.89    |
| hsa-miR-124-3p   | 4.45    | 6.53    | 2.96    |
| hsa-miR-1243     | 5.93    | 0.82    | 2.96    |
| hsa-miR-1244     | 4.45    | 4.9     | 4.93    |
| hsa-miR-1245a    | 1.48    | 1.63    | 6.9     |
| hsa-miR-1245b-3p | 8.89    | 3.27    | 4.93    |
| hsa-miR-1245b-5p | 11.86   | 13.88   | 7.89    |
| hsa-miR-1246     | 0.74    | 0.82    | 0.99    |
| hsa-miR-1247-5p  | 2.22    | 4.9     | 3.94    |
| hsa-miR-1248     | 8.15    | 5.72    | 2.96    |
| hsa-miR-1249     | 0.74    | 1.63    | 0.99    |
| hsa-miR-1250     | 3.71    | 4.9     | 1.97    |
| hsa-miR-1251     | 8.15    | 4.08    | 2.96    |
| hsa-miR-1252     | 10.37   | 7.35    | 5.91    |
| hsa-miR-1253     | 0.74    | 0.82    | 0.99    |
| hsa-miR-1254     | 5.19    | 4.9     | 1.97    |
| hsa-miR-1255a    | 7.41    | 15.52   | 11.83   |
| hsa-miR-1255b-5p | 5.93    | 4.08    | 7.89    |
| hsa-miR-1256     | 2.96    | 3.27    | 0.99    |
| hsa-miR-1257     | 5.19    | 9.8     | 10.84   |
| hsa-miR-1258     | 6.67    | 6.53    | 5.91    |
| hsa-miR-125a-3p  | 6.67    | 13.07   | 20.7    |
| hsa-miR-125a-5p  | 344.6   | 897.61  | 1491.29 |
| hsa-miR-125b-5p  | 4036.59 | 4479.05 | 3925.85 |
| hsa-miR-126-3p   | 71.88   | 89.03   | 82.79   |
| hsa-miR-1260a    | 232.69  | 197.65  | 124.19  |
| hsa-miR-1260b    | 6.67    | 13.07   | 8.87    |
| hsa-miR-1261     | 5.19    | 6.53    | 3.94    |
| hsa-miR-1262     | 8.89    | 5.72    | 5.91    |
| hsa-miR-1263     | 0.74    | 0.82    | 1.97    |
| hsa-miR-1264     | 6.67    | 7.35    | 5.91    |
| hsa-miR-1265     | 4.45    | 5.72    | 4.93    |
| hsa-miR-1266     | 4.45    | 4.08    | 0.99    |
| hsa-miR-1267     | 6.67    | 8.98    | 8.87    |
| hsa-miR-1268a    | 5.93    | 4.9     | 4.93    |
| hsa-miR-1268b    | 2.96    | 5.72    | 1.97    |
| hsa-miR-1269a    | 7.41    | 2.45    | 5.91    |
| hsa-miR-1269b    | 5.93    | 0.82    | 8.87    |
| hsa-miR-127-3p   | 4.45    | 6.53    | 2.96    |
| hsa-miR-127-5p   | 8.15    | 5.72    | 7.89    |
| hsa-miR-1270     | 10.37   | 8.17    | 3.94    |
| hsa-miR-1271-5p  | 5.93    | 4.08    | 6.9     |
| hsa-miR-1272     | 5.93    | 8.17    | 4.93    |

|                  |        |       |        |
|------------------|--------|-------|--------|
| hsa-miR-1273a    | 0.74   | 6.53  | 5.91   |
| hsa-miR-1273c    | 7.41   | 8.98  | 5.91   |
| hsa-miR-1273d    | 6.67   | 5.72  | 5.91   |
| hsa-miR-1273e    | 5.93   | 7.35  | 5.91   |
| hsa-miR-1273f    | 2.22   | 2.45  | 3.94   |
| hsa-miR-1273g-5p | 5.19   | 5.72  | 2.96   |
| hsa-miR-1275     | 9.63   | 7.35  | 8.87   |
| hsa-miR-1276     | 5.93   | 6.53  | 3.94   |
| hsa-miR-1277-3p  | 7.41   | 7.35  | 6.9    |
| hsa-miR-1278     | 5.19   | 9.8   | 6.9    |
| hsa-miR-1279     | 11.86  | 9.8   | 4.93   |
| hsa-miR-128      | 14.82  | 7.35  | 8.87   |
| hsa-miR-1280     | 3.71   | 1.63  | 4.93   |
| hsa-miR-1281     | 5.19   | 8.98  | 4.93   |
| hsa-miR-1282     | 4.45   | 4.9   | 4.93   |
| hsa-miR-1283     | 0.74   | 0.82  | 0.99   |
| hsa-miR-1284     | 9.63   | 8.17  | 6.9    |
| hsa-miR-1285-3p  | 5.19   | 8.17  | 5.91   |
| hsa-miR-1286     | 11.12  | 17.97 | 2.96   |
| hsa-miR-1287     | 12.6   | 6.53  | 13.8   |
| hsa-miR-1288     | 5.93   | 4.08  | 9.86   |
| hsa-miR-1289     | 5.19   | 5.72  | 5.91   |
| hsa-miR-129-2-3p | 59.29  | 27.77 | 15.77  |
| hsa-miR-129-5p   | 10.37  | 10.62 | 2.96   |
| hsa-miR-1290     | 14.08  | 9.8   | 19.71  |
| hsa-miR-1291     | 3.71   | 1.63  | 6.9    |
| hsa-miR-1292     | 2.22   | 0.82  | 1.97   |
| hsa-miR-1293     | 5.93   | 2.45  | 6.9    |
| hsa-miR-1294     | 2.22   | 8.17  | 2.96   |
| hsa-miR-1295a    | 7.41   | 4.08  | 4.93   |
| hsa-miR-1296     | 0.74   | 4.08  | 6.9    |
| hsa-miR-1297     | 3.71   | 4.9   | 3.94   |
| hsa-miR-1298     | 4.45   | 10.62 | 8.87   |
| hsa-miR-1299     | 2.22   | 8.17  | 3.94   |
| hsa-miR-1301     | 6.67   | 4.08  | 7.89   |
| hsa-miR-1302     | 2.96   | 4.08  | 1.97   |
| hsa-miR-1303     | 3.71   | 4.9   | 2.96   |
| hsa-miR-1304-5p  | 5.19   | 4.9   | 2.96   |
| hsa-miR-1305     | 9.63   | 4.08  | 4.93   |
| hsa-miR-1306-3p  | 3.71   | 3.27  | 5.91   |
| hsa-miR-1307-3p  | 6.67   | 1.63  | 6.9    |
| hsa-miR-130a-3p  | 724.76 | 458.2 | 214.87 |
| hsa-miR-130b-3p  | 22.23  | 8.17  | 8.87   |
| hsa-miR-132-3p   | 25.2   | 21.24 | 16.76  |
| hsa-miR-1321     | 6.67   | 9.8   | 5.91   |
| hsa-miR-1322     | 4.45   | 6.53  | 2.96   |
| hsa-miR-1323     | 11.12  | 9.8   | 10.84  |

|                              |         |         |         |
|------------------------------|---------|---------|---------|
| hsa-miR-1324                 | 8.15    | 5.72    | 3.94    |
| hsa-miR-133a                 | 2.96    | 0.82    | 1.97    |
| hsa-miR-133b                 | 3.71    | 4.08    | 2.96    |
| hsa-miR-134                  | 3.71    | 10.62   | 7.89    |
| hsa-miR-135a-5p              | 3.71    | 6.53    | 3.94    |
| hsa-miR-135b-5p              | 105.97  | 57.99   | 297.67  |
| hsa-miR-136-5p               | 5.19    | 4.9     | 4.93    |
| hsa-miR-137                  | 20.01   | 44.92   | 82.79   |
| hsa-miR-138-5p               | 5.93    | 6.53    | 3.94    |
| hsa-miR-139-3p               | 8.89    | 4.08    | 4.93    |
| hsa-miR-139-5p               | 5.19    | 4.08    | 3.94    |
| hsa-miR-140-3p               | 5.19    | 3.27    | 7.89    |
| hsa-miR-140-5p               | 45.95   | 35.94   | 84.77   |
| hsa-miR-141-3p               | 10.37   | 3.27    | 3.94    |
| hsa-miR-142-3p               | 560.25  | 198.47  | 9.86    |
| hsa-miR-142-5p               | 4.45    | 8.17    | 2.96    |
| hsa-miR-143-3p               | 0.74    | 0.82    | 0.99    |
| hsa-miR-144-3p               | 0.74    | 13.07   | 0.99    |
| hsa-miR-145-5p               | 8.15    | 6.53    | 3.94    |
| hsa-miR-1468                 | 4.45    | 7.35    | 5.91    |
| hsa-miR-1469                 | 1.48    | 2.45    | 3.94    |
| hsa-miR-146a-5p              | 54.84   | 130.68  | 12.81   |
| hsa-miR-146b-3p              | 2.22    | 4.08    | 11.83   |
| hsa-miR-146b-5p              | 0.74    | 2.45    | 5.91    |
| hsa-miR-1470                 | 5.93    | 4.9     | 1.97    |
| hsa-miR-1471                 | 2.22    | 5.72    | 2.96    |
| hsa-miR-147a                 | 2.22    | 1.63    | 1.97    |
| hsa-miR-147b                 | 3.71    | 4.08    | 3.94    |
| hsa-miR-148a-3p              | 17.04   | 31.85   | 45.34   |
| hsa-miR-148b-3p              | 103.01  | 46.55   | 63.08   |
| hsa-miR-149-5p               | 19.27   | 31.04   | 44.35   |
| hsa-miR-150-5p               | 7.41    | 5.72    | 0.99    |
| hsa-miR-151a-3p              | 91.89   | 86.58   | 105.46  |
| hsa-miR-151a-5p              | 14.82   | 12.25   | 8.87    |
| hsa-miR-151b                 | 1.48    | 4.9     | 10.84   |
| hsa-miR-152                  | 8.89    | 4.9     | 10.84   |
| hsa-miR-153                  | 11.86   | 8.17    | 5.91    |
| hsa-miR-1537                 | 5.19    | 4.08    | 5.91    |
| hsa-miR-1538                 | 3.71    | 6.53    | 0.99    |
| hsa-miR-1539                 | 5.19    | 3.27    | 3.94    |
| hsa-miR-154-5p               | 5.93    | 3.27    | 5.91    |
| hsa-miR-155-5p               | 0.74    | 98.01   | 0.99    |
| hsa-miR-15a-5p               | 493.55  | 404.29  | 624.9   |
| hsa-miR-15b-5p               | 1834.14 | 1058.51 | 1935.82 |
| hsa-miR-16-5p                | 674.37  | 350.39  | 596.32  |
| hsa-miR-181a-5p              | 326.81  | 159.27  | 266.13  |
| hsa-miR-181b-5p+hsa-miR-181d | 33.35   | 21.24   | 25.63   |

|                                 |        |        |        |
|---------------------------------|--------|--------|--------|
| hsa-miR-181c-5p                 | 10.37  | 6.53   | 7.89   |
| hsa-miR-182-5p                  | 27.42  | 17.15  | 23.66  |
| hsa-miR-1825                    | 9.63   | 8.98   | 5.91   |
| hsa-miR-1827                    | 15.56  | 17.97  | 24.64  |
| hsa-miR-183-5p                  | 44.46  | 26.95  | 20.7   |
| hsa-miR-184                     | 5.93   | 8.98   | 5.91   |
| hsa-miR-185-5p                  | 27.42  | 19.6   | 45.34  |
| hsa-miR-186-5p                  | 9.63   | 5.72   | 6.9    |
| hsa-miR-187-3p                  | 7.41   | 8.98   | 2.96   |
| hsa-miR-188-3p                  | 2.22   | 7.35   | 7.89   |
| hsa-miR-188-5p                  | 33.35  | 34.3   | 27.6   |
| hsa-miR-18a-5p                  | 156.37 | 75.14  | 43.37  |
| hsa-miR-18b-5p                  | 4.45   | 4.9    | 8.87   |
| hsa-miR-1908                    | 3.71   | 8.17   | 4.93   |
| hsa-miR-1909-3p                 | 4.45   | 3.27   | 4.93   |
| hsa-miR-190a                    | 2.96   | 5.72   | 2.96   |
| hsa-miR-190b                    | 8.15   | 10.62  | 5.91   |
| hsa-miR-191-5p                  | 269.01 | 148.65 | 481.98 |
| hsa-miR-1910                    | 2.96   | 1.63   | 6.9    |
| hsa-miR-1911-5p                 | 2.96   | 0.82   | 1.97   |
| hsa-miR-1912                    | 6.67   | 8.17   | 9.86   |
| hsa-miR-1913                    | 6.67   | 10.62  | 3.94   |
| hsa-miR-1914-5p                 | 3.71   | 4.9    | 2.96   |
| hsa-miR-1915-3p                 | 3.71   | 10.62  | 7.89   |
| hsa-miR-192-5p                  | 28.16  | 15.52  | 31.54  |
| hsa-miR-193a-3p                 | 7.41   | 4.08   | 5.91   |
| hsa-miR-193a-5p                 | 9.63   | 41.65  | 29.57  |
| hsa-miR-193b-3p                 | 5.93   | 12.25  | 25.63  |
| hsa-miR-194-5p                  | 31.12  | 5.72   | 27.6   |
| hsa-miR-195-5p                  | 7.41   | 4.9    | 10.84  |
| hsa-miR-196a-5p                 | 11.12  | 26.95  | 8.87   |
| hsa-miR-196b-5p                 | 7.41   | 25.32  | 62.1   |
| hsa-miR-197-3p                  | 85.96  | 53.91  | 154.75 |
| hsa-miR-1972                    | 0.74   | 5.72   | 6.9    |
| hsa-miR-1973                    | 6.67   | 4.08   | 10.84  |
| hsa-miR-1976                    | 7.41   | 6.53   | 5.91   |
| hsa-miR-198                     | 5.93   | 4.9    | 4.93   |
| hsa-miR-199a-3p+hsa-miR-199b-3p | 5.19   | 116.8  | 5.91   |
| hsa-miR-199a-5p                 | 11.86  | 56.36  | 4.93   |
| hsa-miR-199b-5p                 | 4.45   | 16.33  | 9.86   |
| hsa-miR-19a-3p                  | 527.64 | 512.92 | 464.24 |
| hsa-miR-19b-3p                  | 916.7  | 892.71 | 600.26 |
| hsa-miR-200a-3p                 | 6.67   | 10.62  | 19.71  |
| hsa-miR-200b-3p                 | 2.22   | 12.25  | 39.43  |
| hsa-miR-200c-3p                 | 15.56  | 4.9    | 5.91   |
| hsa-miR-202-3p                  | 7.41   | 6.53   | 3.94   |
| hsa-miR-203                     | 5.93   | 7.35   | 31.54  |

|                               |         |         |         |
|-------------------------------|---------|---------|---------|
| hsa-miR-204-5p                | 3.71    | 15.52   | 1.97    |
| hsa-miR-205-5p                | 2.96    | 4.08    | 497.75  |
| hsa-miR-2052                  | 10.37   | 4.9     | 3.94    |
| hsa-miR-2053                  | 8.15    | 8.98    | 5.91    |
| hsa-miR-2054                  | 6.67    | 4.08    | 2.96    |
| hsa-miR-206                   | 1.48    | 10.62   | 7.89    |
| hsa-miR-208a                  | 6.67    | 11.43   | 12.81   |
| hsa-miR-208b                  | 7.41    | 7.35    | 4.93    |
| hsa-miR-20a-5p+hsa-miR-20b-5p | 886.32  | 498.22  | 270.07  |
| hsa-miR-21-5p                 | 3624.56 | 1873.62 | 2883.03 |
| hsa-miR-210                   | 33.35   | 20.42   | 199.1   |
| hsa-miR-211-5p                | 5.93    | 7.35    | 4.93    |
| hsa-miR-2110                  | 1.48    | 4.9     | 2.96    |
| hsa-miR-2113                  | 5.93    | 3.27    | 7.89    |
| hsa-miR-2114-5p               | 2.22    | 1.63    | 5.91    |
| hsa-miR-2115-5p               | 3.71    | 4.08    | 6.9     |
| hsa-miR-2116-5p               | 13.34   | 9.8     | 12.81   |
| hsa-miR-2117                  | 14.08   | 22.87   | 11.83   |
| hsa-miR-212-3p                | 2.22    | 8.98    | 3.94    |
| hsa-miR-214-3p                | 2.96    | 9.8     | 3.94    |
| hsa-miR-215                   | 10.37   | 3.27    | 2.96    |
| hsa-miR-216a                  | 7.41    | 13.88   | 6.9     |
| hsa-miR-216b                  | 18.53   | 13.88   | 20.7    |
| hsa-miR-217                   | 6.67    | 3.27    | 4.93    |
| hsa-miR-218-5p                | 33.35   | 8.98    | 7.89    |
| hsa-miR-219-1-3p              | 3.71    | 4.08    | 1.97    |
| hsa-miR-219-2-3p              | 4.45    | 1.63    | 5.91    |
| hsa-miR-219-5p                | 2.22    | 0.82    | 10.84   |
| hsa-miR-22-3p                 | 108.2   | 83.31   | 39.43   |
| hsa-miR-221-3p                | 1883.05 | 703.22  | 804.29  |
| hsa-miR-222-3p                | 657.33  | 159.27  | 208.96  |
| hsa-miR-223-3p                | 2.22    | 3.27    | 10.84   |
| hsa-miR-224-5p                | 5.19    | 6.53    | 5.91    |
| hsa-miR-2276                  | 4.45    | 8.17    | 5.91    |
| hsa-miR-2277-3p               | 5.19    | 4.9     | 3.94    |
| hsa-miR-2277-5p               | 2.96    | 0.82    | 2.96    |
| hsa-miR-2278                  | 2.96    | 3.27    | 0.99    |
| hsa-miR-23a-3p                | 2283.97 | 1207.16 | 2127.04 |
| hsa-miR-23b-3p                | 47.43   | 13.88   | 60.12   |
| hsa-miR-23c                   | 5.93    | 4.9     | 2.96    |
| hsa-miR-24-3p                 | 1017.48 | 285.05  | 1005.36 |
| hsa-miR-25-3p                 | 323.85  | 200.92  | 204.03  |
| hsa-miR-2682-5p               | 19.27   | 17.15   | 29.57   |
| hsa-miR-26a-5p                | 114.12  | 121.7   | 150.8   |
| hsa-miR-26b-5p                | 70.4    | 38.39   | 62.1    |
| hsa-miR-27a-3p                | 111.9   | 45.74   | 129.12  |
| hsa-miR-27b-3p                | 135.62  | 84.13   | 628.85  |

|                 |          |          |         |
|-----------------|----------|----------|---------|
| hsa-miR-28-3p   | 42.24    | 45.74    | 48.3    |
| hsa-miR-28-5p   | 33.35    | 29.4     | 35.48   |
| hsa-miR-296-3p  | 1.48     | 4.08     | 2.96    |
| hsa-miR-296-5p  | 2.96     | 53.09    | 6.9     |
| hsa-miR-297     | 16.3     | 20.42    | 15.77   |
| hsa-miR-298     | 5.19     | 7.35     | 2.96    |
| hsa-miR-299-3p  | 8.15     | 4.9      | 4.93    |
| hsa-miR-299-5p  | 4.45     | 6.53     | 6.9     |
| hsa-miR-29a-3p  | 752.18   | 338.95   | 98.57   |
| hsa-miR-29b-3p  | 24782.01 | 12783.76 | 1568.17 |
| hsa-miR-29c-3p  | 111.16   | 53.09    | 62.1    |
| hsa-miR-300     | 3.71     | 5.72     | 0.99    |
| hsa-miR-301a-3p | 198.61   | 38.39    | 55.2    |
| hsa-miR-301b    | 16.3     | 8.98     | 7.89    |
| hsa-miR-302a-3p | 6.67     | 6.53     | 8.87    |
| hsa-miR-302b-3p | 9.63     | 13.07    | 10.84   |
| hsa-miR-302c-3p | 3.71     | 7.35     | 4.93    |
| hsa-miR-302d-3p | 44.46    | 39.2     | 41.4    |
| hsa-miR-302e    | 5.19     | 4.9      | 8.87    |
| hsa-miR-302f    | 11.12    | 7.35     | 8.87    |
| hsa-miR-30a-5p  | 187.49   | 59.62    | 319.35  |
| hsa-miR-30b-5p  | 283.09   | 167.43   | 247.4   |
| hsa-miR-30c-5p  | 51.13    | 27.77    | 95.61   |
| hsa-miR-30d-5p  | 62.99    | 23.69    | 73.92   |
| hsa-miR-30e-5p  | 42.98    | 23.69    | 54.21   |
| hsa-miR-31-5p   | 3.71     | 6.53     | 161.65  |
| hsa-miR-3123    | 4.45     | 5.72     | 4.93    |
| hsa-miR-3127-5p | 1.48     | 1.63     | 3.94    |
| hsa-miR-3131    | 4.45     | 6.53     | 7.89    |
| hsa-miR-3136-5p | 11.12    | 10.62    | 3.94    |
| hsa-miR-3141    | 12.6     | 6.53     | 5.91    |
| hsa-miR-3144-5p | 4.45     | 5.72     | 3.94    |
| hsa-miR-3147    | 4.45     | 11.43    | 4.93    |
| hsa-miR-3151    | 5.19     | 2.45     | 2.96    |
| hsa-miR-3154    | 4.45     | 4.9      | 5.91    |
| hsa-miR-3161    | 3.71     | 4.08     | 1.97    |
| hsa-miR-3164    | 5.19     | 6.53     | 6.9     |
| hsa-miR-3168    | 13.34    | 8.17     | 7.89    |
| hsa-miR-3175    | 10.37    | 7.35     | 4.93    |
| hsa-miR-3178    | 5.19     | 3.27     | 4.93    |
| hsa-miR-3180    | 3.71     | 5.72     | 3.94    |
| hsa-miR-3180-3p | 3.71     | 4.9      | 2.96    |
| hsa-miR-3180-5p | 1.48     | 7.35     | 3.94    |
| hsa-miR-3182    | 3.71     | 6.53     | 3.94    |
| hsa-miR-3184-5p | 3.71     | 8.98     | 2.96    |
| hsa-miR-3185    | 3.71     | 2.45     | 2.96    |
| hsa-miR-3187-3p | 8.15     | 7.35     | 10.84   |

|                 |        |        |        |
|-----------------|--------|--------|--------|
| hsa-miR-3190-5p | 5.93   | 8.17   | 3.94   |
| hsa-miR-3192    | 7.41   | 4.9    | 3.94   |
| hsa-miR-3195    | 5.19   | 20.42  | 3.94   |
| hsa-miR-3196    | 11.12  | 6.53   | 8.87   |
| hsa-miR-32-5p   | 205.28 | 232.77 | 243.46 |
| hsa-miR-3200-3p | 9.63   | 8.17   | 7.89   |
| hsa-miR-320a    | 10.37  | 9.8    | 9.86   |
| hsa-miR-320b    | 5.19   | 4.9    | 3.94   |
| hsa-miR-320c    | 3.71   | 4.9    | 3.94   |
| hsa-miR-320d    | 3.71   | 2.45   | 9.86   |
| hsa-miR-320e    | 19.27  | 14.7   | 10.84  |
| hsa-miR-323a-3p | 5.19   | 4.08   | 4.93   |
| hsa-miR-323a-5p | 0.74   | 4.08   | 6.9    |
| hsa-miR-323b-3p | 2.96   | 4.08   | 3.94   |
| hsa-miR-323b-5p | 0.74   | 6.53   | 2.96   |
| hsa-miR-324-3p  | 11.86  | 9.8    | 15.77  |
| hsa-miR-324-5p  | 148.95 | 33.49  | 88.71  |
| hsa-miR-325     | 4.45   | 7.35   | 4.93   |
| hsa-miR-326     | 11.12  | 7.35   | 4.93   |
| hsa-miR-328     | 4.45   | 4.08   | 3.94   |
| hsa-miR-329     | 7.41   | 5.72   | 7.89   |
| hsa-miR-330-3p  | 6.67   | 5.72   | 11.83  |
| hsa-miR-330-5p  | 2.96   | 6.53   | 3.94   |
| hsa-miR-331-3p  | 64.47  | 22.05  | 69.98  |
| hsa-miR-331-5p  | 2.22   | 2.45   | 4.93   |
| hsa-miR-335-5p  | 8.15   | 8.17   | 7.89   |
| hsa-miR-337-3p  | 8.89   | 11.43  | 13.8   |
| hsa-miR-337-5p  | 7.41   | 5.72   | 5.91   |
| hsa-miR-338-3p  | 18.53  | 9.8    | 7.89   |
| hsa-miR-338-5p  | 4.45   | 2.45   | 1.97   |
| hsa-miR-339-3p  | 3.71   | 8.98   | 4.93   |
| hsa-miR-339-5p  | 3.71   | 6.53   | 6.9    |
| hsa-miR-33a-5p  | 40.02  | 50.64  | 82.79  |
| hsa-miR-33b-5p  | 5.19   | 1.63   | 4.93   |
| hsa-miR-340-5p  | 8.15   | 5.72   | 8.87   |
| hsa-miR-342-3p  | 51.87  | 17.15  | 86.74  |
| hsa-miR-342-5p  | 5.19   | 6.53   | 4.93   |
| hsa-miR-345-5p  | 11.12  | 8.17   | 5.91   |
| hsa-miR-346     | 2.96   | 3.27   | 10.84  |
| hsa-miR-34a-5p  | 8.89   | 294.85 | 4.93   |
| hsa-miR-34b-3p  | 5.93   | 4.9    | 3.94   |
| hsa-miR-34c-3p  | 11.86  | 7.35   | 8.87   |
| hsa-miR-34c-5p  | 3.71   | 5.72   | 5.91   |
| hsa-miR-3605-5p | 6.67   | 3.27   | 5.91   |
| hsa-miR-361-3p  | 15.56  | 17.15  | 25.63  |
| hsa-miR-361-5p  | 134.87 | 80.04  | 137.01 |
| hsa-miR-3614-5p | 4.45   | 7.35   | 4.93   |



|                              |        |       |        |
|------------------------------|--------|-------|--------|
| hsa-miR-362-3p               | 4.45   | 4.9   | 15.77  |
| hsa-miR-362-5p               | 13.34  | 13.07 | 27.6   |
| hsa-miR-363-3p               | 0.74   | 0.82  | 0.99   |
| hsa-miR-365a-3p              | 6.67   | 20.42 | 23.66  |
| hsa-miR-367-3p               | 13.34  | 8.98  | 11.83  |
| hsa-miR-3676-3p              | 17.04  | 17.97 | 11.83  |
| hsa-miR-369-3p               | 8.89   | 7.35  | 5.91   |
| hsa-miR-369-5p               | 2.22   | 7.35  | 5.91   |
| hsa-miR-3690                 | 5.19   | 7.35  | 5.91   |
| hsa-miR-370                  | 7.41   | 7.35  | 2.96   |
| hsa-miR-371a-3p              | 19.27  | 10.62 | 12.81  |
| hsa-miR-371a-5p              | 0.74   | 0.82  | 0.99   |
| hsa-miR-371b-3p              | 2.96   | 5.72  | 5.91   |
| hsa-miR-371b-5p              | 2.96   | 4.9   | 3.94   |
| hsa-miR-372                  | 4.45   | 4.08  | 5.91   |
| hsa-miR-373-3p               | 2.22   | 2.45  | 1.97   |
| hsa-miR-374a-5p              | 263.82 | 185.4 | 466.21 |
| hsa-miR-374b-5p              | 90.41  | 36.75 | 162.63 |
| hsa-miR-374c-5p              | 1.48   | 6.53  | 4.93   |
| hsa-miR-375                  | 6.67   | 5.72  | 6.9    |
| hsa-miR-376a-3p              | 2.96   | 8.98  | 10.84  |
| hsa-miR-376b                 | 5.19   | 5.72  | 4.93   |
| hsa-miR-376c                 | 8.15   | 8.98  | 4.93   |
| hsa-miR-377-3p               | 5.19   | 5.72  | 6.9    |
| hsa-miR-378a-3p+hsa-miR-378i | 34.83  | 19.6  | 13.8   |
| hsa-miR-378b                 | 0.74   | 2.45  | 7.89   |
| hsa-miR-378c                 | 3.71   | 4.08  | 2.96   |
| hsa-miR-378d                 | 2.22   | 5.72  | 0.99   |
| hsa-miR-378e                 | 128.95 | 69.42 | 115.32 |
| hsa-miR-378f                 | 4.45   | 4.08  | 6.9    |
| hsa-miR-378g                 | 15.56  | 8.17  | 7.89   |
| hsa-miR-378h                 | 3.71   | 5.72  | 2.96   |
| hsa-miR-379-5p               | 22.23  | 9.8   | 5.91   |
| hsa-miR-380-3p               | 3.71   | 4.9   | 4.93   |
| hsa-miR-381                  | 5.93   | 6.53  | 3.94   |
| hsa-miR-382-5p               | 4.45   | 8.98  | 11.83  |
| hsa-miR-383                  | 7.41   | 4.08  | 5.91   |
| hsa-miR-384                  | 4.45   | 5.72  | 3.94   |
| hsa-miR-3928                 | 0.74   | 4.9   | 4.93   |
| hsa-miR-3934                 | 8.89   | 5.72  | 13.8   |
| hsa-miR-409-3p               | 5.93   | 6.53  | 2.96   |
| hsa-miR-409-5p               | 11.86  | 13.07 | 5.91   |
| hsa-miR-410                  | 11.12  | 11.43 | 4.93   |
| hsa-miR-411-5p               | 16.3   | 17.15 | 24.64  |
| hsa-miR-412                  | 14.82  | 15.52 | 9.86   |
| hsa-miR-421                  | 17.04  | 4.08  | 12.81  |
| hsa-miR-422a                 | 5.93   | 8.98  | 5.91   |

|                 |         |         |        |
|-----------------|---------|---------|--------|
| hsa-miR-423-3p  | 111.9   | 26.14   | 84.77  |
| hsa-miR-423-5p  | 37.05   | 8.98    | 28.58  |
| hsa-miR-424-5p  | 20.75   | 14.7    | 6.9    |
| hsa-miR-425-5p  | 66.7    | 17.15   | 64.07  |
| hsa-miR-4284    | 7.41    | 3.27    | 10.84  |
| hsa-miR-4286    | 22.97   | 31.85   | 17.74  |
| hsa-miR-429     | 5.93    | 13.07   | 21.68  |
| hsa-miR-431-5p  | 6.67    | 9.8     | 2.96   |
| hsa-miR-432-5p  | 5.93    | 8.17    | 7.89   |
| hsa-miR-433     | 6.67    | 2.45    | 1.97   |
| hsa-miR-4421    | 1.48    | 6.53    | 8.87   |
| hsa-miR-4425    | 2.22    | 8.17    | 7.89   |
| hsa-miR-4431    | 8.15    | 4.9     | 5.91   |
| hsa-miR-4435    | 1.48    | 5.72    | 4.93   |
| hsa-miR-4443    | 0.74    | 0.82    | 0.99   |
| hsa-miR-4448    | 4.45    | 5.72    | 7.89   |
| hsa-miR-4451    | 5.93    | 5.72    | 8.87   |
| hsa-miR-4454    | 9053.61 | 2204.41 | 2891.9 |
| hsa-miR-4455    | 8.15    | 10.62   | 7.89   |
| hsa-miR-4458    | 9.63    | 8.17    | 3.94   |
| hsa-miR-4461    | 2.96    | 8.98    | 5.91   |
| hsa-miR-448     | 7.41    | 5.72    | 3.94   |
| hsa-miR-4484    | 4.45    | 1.63    | 4.93   |
| hsa-miR-4485    | 4.45    | 5.72    | 3.94   |
| hsa-miR-4488    | 22.23   | 13.88   | 17.74  |
| hsa-miR-449a    | 6.67    | 8.98    | 5.91   |
| hsa-miR-449b-5p | 3.71    | 4.08    | 2.96   |
| hsa-miR-449c-5p | 13.34   | 9.8     | 14.78  |
| hsa-miR-4508    | 4.45    | 3.27    | 6.9    |
| hsa-miR-450a-5p | 31.87   | 35.12   | 22.67  |
| hsa-miR-450b-3p | 5.19    | 7.35    | 6.9    |
| hsa-miR-450b-5p | 11.12   | 13.88   | 11.83  |
| hsa-miR-4516    | 11.86   | 49.82   | 2.96   |
| hsa-miR-451a    | 2.96    | 7.35    | 8.87   |
| hsa-miR-452-5p  | 2.22    | 3.27    | 3.94   |
| hsa-miR-4521    | 3.71    | 4.08    | 3.94   |
| hsa-miR-4531    | 8.89    | 4.9     | 8.87   |
| hsa-miR-4532    | 9.63    | 12.25   | 4.93   |
| hsa-miR-454-3p  | 16.3    | 12.25   | 14.78  |
| hsa-miR-455-3p  | 24.46   | 29.4    | 3.94   |
| hsa-miR-455-5p  | 26.68   | 53.09   | 7.89   |
| hsa-miR-4647    | 5.19    | 5.72    | 2.96   |
| hsa-miR-4741    | 5.93    | 7.35    | 4.93   |
| hsa-miR-4792    | 1.48    | 6.53    | 3.94   |
| hsa-miR-483-3p  | 18.53   | 10.62   | 6.9    |
| hsa-miR-483-5p  | 6.67    | 1.63    | 6.9    |
| hsa-miR-484     | 20.01   | 9.8     | 31.54  |

|                                |        |       |       |
|--------------------------------|--------|-------|-------|
| hsa-miR-485-3p                 | 4.45   | 6.53  | 2.96  |
| hsa-miR-485-5p                 | 2.96   | 4.08  | 3.94  |
| hsa-miR-486-3p                 | 5.19   | 6.53  | 18.73 |
| hsa-miR-487a                   | 5.93   | 7.35  | 6.9   |
| hsa-miR-487b                   | 8.89   | 8.17  | 4.93  |
| hsa-miR-488-3p                 | 2.96   | 0.82  | 3.94  |
| hsa-miR-489                    | 16.3   | 18.79 | 20.7  |
| hsa-miR-490-3p                 | 1.48   | 6.53  | 1.97  |
| hsa-miR-490-5p                 | 2.22   | 4.08  | 8.87  |
| hsa-miR-491-3p                 | 0.74   | 4.08  | 3.94  |
| hsa-miR-491-5p                 | 7.41   | 5.72  | 2.96  |
| hsa-miR-492                    | 4.45   | 1.63  | 1.97  |
| hsa-miR-493-3p                 | 5.93   | 3.27  | 1.97  |
| hsa-miR-494                    | 11.86  | 6.53  | 36.47 |
| hsa-miR-495                    | 6.67   | 8.98  | 15.77 |
| hsa-miR-496                    | 5.93   | 8.98  | 5.91  |
| hsa-miR-497-5p                 | 5.19   | 2.45  | 4.93  |
| hsa-miR-498                    | 2.96   | 3.27  | 5.91  |
| hsa-miR-499a-3p                | 6.67   | 8.98  | 9.86  |
| hsa-miR-499a-5p                | 2.22   | 6.53  | 7.89  |
| hsa-miR-499b-3p                | 2.22   | 5.72  | 3.94  |
| hsa-miR-499b-5p                | 4.45   | 8.98  | 1.97  |
| hsa-miR-500a-5p+hsa-miR-501-5p | 18.53  | 8.98  | 10.84 |
| hsa-miR-500b                   | 5.19   | 1.63  | 2.96  |
| hsa-miR-501-3p                 | 1.48   | 2.45  | 10.84 |
| hsa-miR-502-3p                 | 6.67   | 6.53  | 3.94  |
| hsa-miR-502-5p                 | 8.89   | 5.72  | 4.93  |
| hsa-miR-503                    | 305.32 | 68.61 | 9.86  |
| hsa-miR-504                    | 38.54  | 18.79 | 14.78 |
| hsa-miR-505-3p                 | 7.41   | 8.98  | 10.84 |
| hsa-miR-506-3p                 | 7.41   | 9.8   | 1.97  |
| hsa-miR-507                    | 8.89   | 6.53  | 4.93  |
| hsa-miR-508-3p                 | 5.19   | 3.27  | 7.89  |
| hsa-miR-508-5p                 | 5.19   | 8.17  | 0.99  |
| hsa-miR-509-3-5p               | 5.19   | 5.72  | 3.94  |
| hsa-miR-509-3p                 | 4.45   | 0.82  | 6.9   |
| hsa-miR-509-5p                 | 5.19   | 1.63  | 4.93  |
| hsa-miR-510                    | 3.71   | 4.9   | 4.93  |
| hsa-miR-511                    | 5.93   | 8.17  | 12.81 |
| hsa-miR-512-3p                 | 8.15   | 6.53  | 4.93  |
| hsa-miR-512-5p                 | 7.41   | 15.52 | 4.93  |
| hsa-miR-513a-3p                | 7.41   | 4.08  | 1.97  |
| hsa-miR-513a-5p                | 5.93   | 4.08  | 0.99  |
| hsa-miR-513b                   | 5.19   | 1.63  | 2.96  |
| hsa-miR-513c-5p                | 5.19   | 4.9   | 2.96  |
| hsa-miR-514a-3p                | 7.41   | 4.08  | 5.91  |
| hsa-miR-514b-3p                | 2.22   | 4.08  | 2.96  |

|                                              |       |       |       |
|----------------------------------------------|-------|-------|-------|
| hsa-miR-514b-5p                              | 11.12 | 13.88 | 13.8  |
| hsa-miR-515-3p                               | 6.67  | 10.62 | 4.93  |
| hsa-miR-515-5p                               | 5.93  | 1.63  | 5.91  |
| hsa-miR-516a-3p                              | 8.89  | 10.62 | 3.94  |
| hsa-miR-516a-5p                              | 2.22  | 2.45  | 2.96  |
| hsa-miR-516b-5p                              | 3.71  | 2.45  | 2.96  |
| hsa-miR-517a-3p                              | 2.96  | 8.17  | 7.89  |
| hsa-miR-517b-3p                              | 2.22  | 4.9   | 2.96  |
| hsa-miR-517c-3p+hsa-miR-519a-3p              | 9.63  | 7.35  | 4.93  |
| hsa-miR-518a-3p                              | 12.6  | 10.62 | 2.96  |
| hsa-miR-518b                                 | 11.86 | 6.53  | 5.91  |
| hsa-miR-518c-3p                              | 5.93  | 8.98  | 7.89  |
| hsa-miR-518d-3p                              | 3.71  | 4.9   | 4.93  |
| hsa-miR-518e-3p                              | 2.96  | 6.53  | 3.94  |
| hsa-miR-518f-3p                              | 8.89  | 5.72  | 0.99  |
| hsa-miR-519b-3p                              | 3.71  | 2.45  | 1.97  |
| hsa-miR-519b-5p+hsa-miR-519c-5p              | 2.22  | 5.72  | 2.96  |
| hsa-miR-519c-3p                              | 17.04 | 10.62 | 11.83 |
| hsa-miR-519d                                 | 9.63  | 12.25 | 12.81 |
| hsa-miR-519e-3p                              | 3.71  | 2.45  | 4.93  |
| hsa-miR-520a-3p                              | 2.96  | 7.35  | 7.89  |
| hsa-miR-520a-5p                              | 2.22  | 4.08  | 7.89  |
| hsa-miR-520b                                 | 2.96  | 8.98  | 3.94  |
| hsa-miR-520c-3p                              | 8.15  | 6.53  | 4.93  |
| hsa-miR-520d-3p                              | 5.19  | 8.98  | 6.9   |
| hsa-miR-520d-5p+hsa-miR-518a-5p+hsa-miR-527  | 10.37 | 10.62 | 5.91  |
| hsa-miR-520e                                 | 2.96  | 4.9   | 3.94  |
| hsa-miR-520f                                 | 8.89  | 4.08  | 7.89  |
| hsa-miR-520g                                 | 2.22  | 2.45  | 3.94  |
| hsa-miR-520h                                 | 7.41  | 8.98  | 9.86  |
| hsa-miR-521                                  | 1.48  | 5.72  | 2.96  |
| hsa-miR-522-3p                               | 5.19  | 4.08  | 3.94  |
| hsa-miR-523-3p                               | 1.48  | 4.9   | 1.97  |
| hsa-miR-524-3p                               | 10.37 | 8.17  | 8.87  |
| hsa-miR-524-5p                               | 2.96  | 0.82  | 3.94  |
| hsa-miR-525-3p                               | 8.89  | 8.98  | 9.86  |
| hsa-miR-525-5p                               | 2.96  | 5.72  | 6.9   |
| hsa-miR-526a+hsa-miR-520c-5p+hsa-miR-518d-5p | 5.19  | 3.27  | 2.96  |
| hsa-miR-526b-5p                              | 3.71  | 0.82  | 1.97  |
| hsa-miR-532-3p                               | 11.12 | 8.17  | 5.91  |
| hsa-miR-532-5p                               | 9.63  | 12.25 | 12.81 |
| hsa-miR-539-5p                               | 4.45  | 4.08  | 0.99  |
| hsa-miR-541-3p                               | 2.96  | 4.9   | 4.93  |
| hsa-miR-542-3p                               | 11.12 | 10.62 | 9.86  |
| hsa-miR-542-5p                               | 4.45  | 4.08  | 0.99  |
| hsa-miR-543                                  | 8.15  | 7.35  | 7.89  |
| hsa-miR-544a                                 | 8.89  | 10.62 | 9.86  |

|                  |       |       |       |
|------------------|-------|-------|-------|
| hsa-miR-544b     | 4.45  | 7.35  | 4.93  |
| hsa-miR-545-3p   | 2.96  | 0.82  | 5.91  |
| hsa-miR-548a-3p  | 5.93  | 13.07 | 5.91  |
| hsa-miR-548a-5p  | 17.04 | 8.98  | 7.89  |
| hsa-miR-548aa    | 20.01 | 13.88 | 21.68 |
| hsa-miR-548ab    | 2.22  | 5.72  | 5.91  |
| hsa-miR-548ac    | 3.71  | 4.9   | 2.96  |
| hsa-miR-548ad    | 8.15  | 6.53  | 7.89  |
| hsa-miR-548ae    | 2.96  | 5.72  | 3.94  |
| hsa-miR-548ag    | 8.15  | 7.35  | 5.91  |
| hsa-miR-548ah-5p | 8.15  | 12.25 | 14.78 |
| hsa-miR-548ai    | 5.93  | 11.43 | 12.81 |
| hsa-miR-548aj-3p | 2.96  | 2.45  | 1.97  |
| hsa-miR-548ak    | 7.41  | 6.53  | 6.9   |
| hsa-miR-548al    | 11.12 | 5.72  | 3.94  |
| hsa-miR-548am-3p | 4.45  | 4.9   | 5.91  |
| hsa-miR-548an    | 4.45  | 4.08  | 4.93  |
| hsa-miR-548b-3p  | 3.71  | 8.17  | 5.91  |
| hsa-miR-548b-5p  | 6.67  | 1.63  | 1.97  |
| hsa-miR-548c-3p  | 5.19  | 4.08  | 6.9   |
| hsa-miR-548c-5p  | 5.19  | 5.72  | 8.87  |
| hsa-miR-548d-3p  | 7.41  | 14.7  | 16.76 |
| hsa-miR-548d-5p  | 5.93  | 0.82  | 2.96  |
| hsa-miR-548e     | 1.48  | 1.63  | 8.87  |
| hsa-miR-548f     | 8.15  | 3.27  | 4.93  |
| hsa-miR-548g-3p  | 6.67  | 5.72  | 4.93  |
| hsa-miR-548h-5p  | 6.67  | 7.35  | 1.97  |
| hsa-miR-548i     | 5.19  | 3.27  | 0.99  |
| hsa-miR-548j     | 2.22  | 3.27  | 4.93  |
| hsa-miR-548k     | 8.15  | 8.98  | 13.8  |
| hsa-miR-548l     | 4.45  | 3.27  | 6.9   |
| hsa-miR-548m     | 2.22  | 4.08  | 7.89  |
| hsa-miR-548n     | 9.63  | 8.98  | 8.87  |
| hsa-miR-548o-3p  | 5.19  | 3.27  | 4.93  |
| hsa-miR-548p     | 10.37 | 8.17  | 5.91  |
| hsa-miR-548q     | 11.12 | 8.17  | 5.91  |
| hsa-miR-548s     | 6.67  | 8.17  | 3.94  |
| hsa-miR-548t-5p  | 11.12 | 11.43 | 10.84 |
| hsa-miR-548u     | 2.22  | 1.63  | 6.9   |
| hsa-miR-548v     | 7.41  | 6.53  | 4.93  |
| hsa-miR-548w     | 1.48  | 8.17  | 4.93  |
| hsa-miR-548x-3p  | 4.45  | 4.9   | 13.8  |
| hsa-miR-548y     | 1.48  | 3.27  | 1.97  |
| hsa-miR-548z     | 3.71  | 8.17  | 8.87  |
| hsa-miR-549      | 0.74  | 0.82  | 0.99  |
| hsa-miR-550a-5p  | 3.71  | 5.72  | 5.91  |
| hsa-miR-550b-3p  | 12.6  | 13.07 | 9.86  |

|                 |       |       |       |
|-----------------|-------|-------|-------|
| hsa-miR-551a    | 2.96  | 3.27  | 4.93  |
| hsa-miR-551b-3p | 9.63  | 4.9   | 16.76 |
| hsa-miR-552     | 8.89  | 7.35  | 5.91  |
| hsa-miR-553     | 8.15  | 6.53  | 3.94  |
| hsa-miR-554     | 11.12 | 4.9   | 6.9   |
| hsa-miR-555     | 2.96  | 3.27  | 4.93  |
| hsa-miR-556-3p  | 5.19  | 6.53  | 5.91  |
| hsa-miR-556-5p  | 2.96  | 3.27  | 6.9   |
| hsa-miR-557     | 5.93  | 0.82  | 5.91  |
| hsa-miR-558     | 4.45  | 7.35  | 3.94  |
| hsa-miR-559     | 3.71  | 5.72  | 4.93  |
| hsa-miR-561-3p  | 5.93  | 5.72  | 2.96  |
| hsa-miR-562     | 9.63  | 5.72  | 6.9   |
| hsa-miR-563     | 11.12 | 3.27  | 6.9   |
| hsa-miR-564     | 5.19  | 8.17  | 8.87  |
| hsa-miR-566     | 8.15  | 17.15 | 11.83 |
| hsa-miR-567     | 5.93  | 4.9   | 2.96  |
| hsa-miR-568     | 6.67  | 10.62 | 4.93  |
| hsa-miR-569     | 5.19  | 4.08  | 4.93  |
| hsa-miR-570-3p  | 22.23 | 25.32 | 28.58 |
| hsa-miR-571     | 2.96  | 1.63  | 9.86  |
| hsa-miR-572     | 6.67  | 6.53  | 3.94  |
| hsa-miR-573     | 2.96  | 5.72  | 5.91  |
| hsa-miR-574-3p  | 33.35 | 52.27 | 51.25 |
| hsa-miR-574-5p  | 55.58 | 32.67 | 41.4  |
| hsa-miR-575     | 11.86 | 13.07 | 11.83 |
| hsa-miR-576-3p  | 7.41  | 3.27  | 6.9   |
| hsa-miR-576-5p  | 5.93  | 8.98  | 3.94  |
| hsa-miR-577     | 9.63  | 4.9   | 4.93  |
| hsa-miR-578     | 6.67  | 8.98  | 6.9   |
| hsa-miR-579     | 26.68 | 22.87 | 35.48 |
| hsa-miR-580     | 8.15  | 6.53  | 5.91  |
| hsa-miR-581     | 8.15  | 3.27  | 4.93  |
| hsa-miR-582-3p  | 5.93  | 8.98  | 6.9   |
| hsa-miR-582-5p  | 5.19  | 7.35  | 29.57 |
| hsa-miR-583     | 11.12 | 7.35  | 9.86  |
| hsa-miR-584-5p  | 4.45  | 9.8   | 12.81 |
| hsa-miR-585     | 6.67  | 5.72  | 6.9   |
| hsa-miR-586     | 3.71  | 9.8   | 6.9   |
| hsa-miR-587     | 7.41  | 13.88 | 15.77 |
| hsa-miR-588     | 3.71  | 1.63  | 1.97  |
| hsa-miR-589-5p  | 4.45  | 5.72  | 7.89  |
| hsa-miR-590-3p  | 4.45  | 6.53  | 4.93  |
| hsa-miR-590-5p  | 29.64 | 24.5  | 77.87 |
| hsa-miR-591     | 3.71  | 3.27  | 3.94  |
| hsa-miR-592     | 3.71  | 11.43 | 4.93  |
| hsa-miR-593-3p  | 13.34 | 6.53  | 5.91  |

|                |       |       |       |
|----------------|-------|-------|-------|
| hsa-miR-595    | 6.67  | 1.63  | 4.93  |
| hsa-miR-596    | 4.45  | 10.62 | 3.94  |
| hsa-miR-597    | 2.96  | 7.35  | 5.91  |
| hsa-miR-598    | 10.37 | 13.07 | 12.81 |
| hsa-miR-599    | 4.45  | 10.62 | 5.91  |
| hsa-miR-600    | 5.93  | 3.27  | 6.9   |
| hsa-miR-601    | 25.94 | 24.5  | 10.84 |
| hsa-miR-602    | 5.93  | 4.08  | 2.96  |
| hsa-miR-603    | 8.89  | 7.35  | 6.9   |
| hsa-miR-604    | 7.41  | 6.53  | 1.97  |
| hsa-miR-605    | 8.15  | 7.35  | 3.94  |
| hsa-miR-606    | 8.15  | 8.17  | 1.97  |
| hsa-miR-607    | 5.93  | 5.72  | 4.93  |
| hsa-miR-608    | 8.15  | 4.08  | 3.94  |
| hsa-miR-609    | 6.67  | 4.9   | 8.87  |
| hsa-miR-610    | 2.96  | 3.27  | 2.96  |
| hsa-miR-611    | 7.41  | 4.9   | 3.94  |
| hsa-miR-612    | 21.49 | 19.6  | 16.76 |
| hsa-miR-613    | 8.15  | 6.53  | 12.81 |
| hsa-miR-614    | 2.96  | 4.08  | 3.94  |
| hsa-miR-615-3p | 5.19  | 1.63  | 2.96  |
| hsa-miR-615-5p | 4.45  | 4.9   | 3.94  |
| hsa-miR-616-3p | 2.96  | 8.98  | 4.93  |
| hsa-miR-617    | 4.45  | 6.53  | 5.91  |
| hsa-miR-618    | 8.15  | 6.53  | 5.91  |
| hsa-miR-619    | 2.22  | 4.08  | 3.94  |
| hsa-miR-620    | 1.48  | 2.45  | 1.97  |
| hsa-miR-621    | 7.41  | 8.17  | 0.99  |
| hsa-miR-622    | 7.41  | 5.72  | 1.97  |
| hsa-miR-623    | 0.74  | 0.82  | 2.96  |
| hsa-miR-624-3p | 7.41  | 8.98  | 4.93  |
| hsa-miR-625-5p | 13.34 | 8.98  | 6.9   |
| hsa-miR-626    | 11.12 | 13.88 | 4.93  |
| hsa-miR-627    | 12.6  | 9.8   | 8.87  |
| hsa-miR-628-3p | 3.71  | 6.53  | 2.96  |
| hsa-miR-628-5p | 4.45  | 3.27  | 2.96  |
| hsa-miR-629-5p | 5.93  | 9.8   | 5.91  |
| hsa-miR-630    | 14.08 | 3.27  | 10.84 |
| hsa-miR-631    | 34.83 | 31.85 | 32.53 |
| hsa-miR-632    | 8.15  | 8.17  | 6.9   |
| hsa-miR-633    | 0.74  | 4.08  | 6.9   |
| hsa-miR-634    | 5.93  | 5.72  | 3.94  |
| hsa-miR-635    | 8.15  | 7.35  | 3.94  |
| hsa-miR-636    | 0.74  | 3.27  | 2.96  |
| hsa-miR-637    | 2.22  | 0.82  | 0.99  |
| hsa-miR-638    | 9.63  | 4.9   | 4.93  |
| hsa-miR-639    | 6.67  | 5.72  | 2.96  |

|                 |         |         |         |
|-----------------|---------|---------|---------|
| hsa-miR-640     | 9.63    | 3.27    | 2.96    |
| hsa-miR-641     | 6.67    | 4.08    | 8.87    |
| hsa-miR-642a-5p | 2.22    | 1.63    | 1.97    |
| hsa-miR-642b-3p | 3.71    | 2.45    | 1.97    |
| hsa-miR-643     | 5.93    | 9.8     | 7.89    |
| hsa-miR-644a    | 0.74    | 5.72    | 6.9     |
| hsa-miR-645     | 4.45    | 1.63    | 5.91    |
| hsa-miR-646     | 9.63    | 5.72    | 7.89    |
| hsa-miR-647     | 3.71    | 5.72    | 6.9     |
| hsa-miR-648     | 5.19    | 6.53    | 3.94    |
| hsa-miR-649     | 0.74    | 1.63    | 4.93    |
| hsa-miR-650     | 5.19    | 3.27    | 0.99    |
| hsa-miR-651     | 5.93    | 1.63    | 2.96    |
| hsa-miR-652-3p  | 11.86   | 9.8     | 10.84   |
| hsa-miR-653     | 5.19    | 10.62   | 1.97    |
| hsa-miR-654-3p  | 5.93    | 6.53    | 5.91    |
| hsa-miR-654-5p  | 2.96    | 4.9     | 7.89    |
| hsa-miR-655     | 11.86   | 14.7    | 11.83   |
| hsa-miR-656     | 4.45    | 6.53    | 4.93    |
| hsa-miR-657     | 5.19    | 8.17    | 5.91    |
| hsa-miR-658     | 5.93    | 8.98    | 1.97    |
| hsa-miR-659-3p  | 8.15    | 13.88   | 9.86    |
| hsa-miR-660-5p  | 14.82   | 10.62   | 18.73   |
| hsa-miR-661     | 2.22    | 4.08    | 6.9     |
| hsa-miR-662     | 1.48    | 4.08    | 1.97    |
| hsa-miR-663a    | 4.45    | 4.08    | 3.94    |
| hsa-miR-663b    | 5.93    | 6.53    | 4.93    |
| hsa-miR-664-3p  | 8.89    | 11.43   | 13.8    |
| hsa-miR-665     | 5.19    | 3.27    | 8.87    |
| hsa-miR-668     | 2.22    | 7.35    | 1.97    |
| hsa-miR-670     | 2.96    | 6.53    | 8.87    |
| hsa-miR-671-3p  | 3.71    | 6.53    | 3.94    |
| hsa-miR-671-5p  | 9.63    | 5.72    | 4.93    |
| hsa-miR-675-5p  | 2.22    | 3.27    | 2.96    |
| hsa-miR-7-5p    | 24.46   | 10.62   | 3.94    |
| hsa-miR-708-5p  | 5.19    | 33.49   | 18.73   |
| hsa-miR-711     | 0.74    | 6.53    | 4.93    |
| hsa-miR-718     | 4.45    | 5.72    | 2.96    |
| hsa-miR-720     | 2202.45 | 1040.54 | 1059.58 |
| hsa-miR-744-5p  | 4.45    | 0.82    | 5.91    |
| hsa-miR-758     | 5.19    | 2.45    | 8.87    |
| hsa-miR-759     | 5.93    | 4.9     | 3.94    |
| hsa-miR-760     | 3.71    | 4.9     | 7.89    |
| hsa-miR-761     | 10.37   | 8.98    | 11.83   |
| hsa-miR-762     | 9.63    | 5.72    | 5.91    |
| hsa-miR-764     | 4.45    | 3.27    | 8.87    |
| hsa-miR-765     | 5.93    | 4.9     | 8.87    |



|                |        |        |        |
|----------------|--------|--------|--------|
| hsa-miR-766-3p | 9.63   | 8.98   | 14.78  |
| hsa-miR-767-3p | 5.19   | 8.98   | 2.96   |
| hsa-miR-767-5p | 8.15   | 8.98   | 3.94   |
| hsa-miR-769-3p | 2.96   | 8.17   | 8.87   |
| hsa-miR-769-5p | 11.86  | 11.43  | 24.64  |
| hsa-miR-770-5p | 10.37  | 13.88  | 10.84  |
| hsa-miR-802    | 9.63   | 12.25  | 2.96   |
| hsa-miR-873-5p | 2.96   | 3.27   | 4.93   |
| hsa-miR-874    | 2.22   | 1.63   | 0.99   |
| hsa-miR-875-3p | 3.71   | 3.27   | 2.96   |
| hsa-miR-875-5p | 5.19   | 3.27   | 3.94   |
| hsa-miR-876-3p | 4.45   | 7.35   | 4.93   |
| hsa-miR-876-5p | 6.67   | 5.72   | 10.84  |
| hsa-miR-877-5p | 2.96   | 2.45   | 7.89   |
| hsa-miR-885-3p | 3.71   | 2.45   | 1.97   |
| hsa-miR-885-5p | 8.15   | 2.45   | 7.89   |
| hsa-miR-887    | 5.93   | 4.9    | 3.94   |
| hsa-miR-888-5p | 20.01  | 17.97  | 8.87   |
| hsa-miR-889    | 5.93   | 7.35   | 6.9    |
| hsa-miR-890    | 6.67   | 3.27   | 7.89   |
| hsa-miR-891a   | 6.67   | 7.35   | 9.86   |
| hsa-miR-891b   | 5.93   | 4.9    | 2.96   |
| hsa-miR-892a   | 8.15   | 7.35   | 5.91   |
| hsa-miR-892b   | 12.6   | 9.8    | 5.91   |
| hsa-miR-9-5p   | 25.94  | 9.8    | 16.76  |
| hsa-miR-920    | 5.19   | 5.72   | 1.97   |
| hsa-miR-921    | 6.67   | 5.72   | 0.99   |
| hsa-miR-922    | 11.86  | 4.08   | 4.93   |
| hsa-miR-924    | 10.37  | 12.25  | 14.78  |
| hsa-miR-92a-3p | 516.52 | 268.71 | 147.85 |
| hsa-miR-92b-3p | 5.19   | 8.17   | 9.86   |
| hsa-miR-93-5p  | 566.17 | 241.76 | 388.35 |
| hsa-miR-933    | 2.22   | 2.45   | 0.99   |
| hsa-miR-934    | 4.45   | 3.27   | 2.96   |
| hsa-miR-935    | 6.67   | 6.53   | 6.9    |
| hsa-miR-936    | 5.19   | 8.17   | 4.93   |
| hsa-miR-937    | 7.41   | 2.45   | 5.91   |
| hsa-miR-938    | 7.41   | 9.8    | 3.94   |
| hsa-miR-939    | 2.96   | 4.08   | 1.97   |
| hsa-miR-940    | 5.93   | 1.63   | 5.91   |
| hsa-miR-941    | 23.71  | 9.8    | 20.7   |
| hsa-miR-942    | 8.89   | 8.98   | 5.91   |
| hsa-miR-943    | 1.48   | 7.35   | 5.91   |
| hsa-miR-944    | 2.96   | 5.72   | 11.83  |
| hsa-miR-95     | 16.3   | 6.53   | 17.74  |
| hsa-miR-96-5p  | 48.17  | 40.02  | 44.35  |
| hsa-miR-98     | 120.79 | 39.2   | 63.08  |

|                |        |        |        |
|----------------|--------|--------|--------|
| hsa-miR-99a-5p | 143.77 | 27.77  | 24.64  |
| hsa-miR-99b-5p | 116.35 | 101.28 | 297.67 |

Supplementary Figure 3
