# Supplementary material
Source: PubMed Central journal article supplement (PMC4753257)
Supplement: onc2014469x6.pdf [file onc2014469x6.pdf]

| <b>Myc-SL</b> | <b>Predicted Target</b> | <b>CLIP-seq</b> |
|---------------|-------------------------|-----------------|
| ARFGEF2       | ✓                       | ✓               |
| CDK2          | ✓                       | ✓               |
| PTPN9         | ✓                       | ✓               |
| SH3KBP1       | ✓                       | ✓               |
| WNK1          | ✓                       | ✓               |
| BMPR1A        | ✓                       | ✓               |
| CPS1          | ✓                       | ✓               |
| EFNA5         | ✓                       | ✓               |
| SDC4          | ✓                       | ✓               |
| KIF18A        | ✓                       | ✓               |
| RAD21         | ✓                       | ✓               |
| WEE1          | ✓                       | ✓               |
| BNIP2         | ✓                       | ✓               |
| CAMK2D        | ✓                       | ✓               |
| PAK6          | ✓                       | ✓               |
| ADRBK2        | ✓                       |                 |
| CRKRS         | ✓                       |                 |
| SLC1A4        | ✓                       |                 |
| BRD4          | ✓                       |                 |
| ITGB5         | ✓                       |                 |
| POLH          | ✓                       |                 |
| CAMK2G        | ✓                       |                 |
| CDH5          | ✓                       |                 |
| CXXC1         | ✓                       |                 |
| GNRHR         | ✓                       |                 |
| HPS1          | ✓                       |                 |
| IGF2R         | ✓                       |                 |
| IRS2          | ✓                       |                 |
| MYLK          | ✓                       |                 |
| MYO3B         | ✓                       |                 |
| NEK2          | ✓                       |                 |
| PDK1          | ✓                       |                 |
| SULF2         | ✓                       |                 |
| SUV39H1       | ✓                       |                 |
| TRIB1         | ✓                       |                 |
| BTK           | ✓                       |                 |
| CCNK          | ✓                       |                 |
| CECR2         | ✓                       |                 |
| CSNK1E        | ✓                       |                 |
| GTF2H4        | ✓                       |                 |
| LATS1         | ✓                       |                 |
| TRIP13        | ✓                       |                 |
| TRRAP         | ✓                       |                 |
| TXK           | ✓                       |                 |
| YES1          | ✓                       |                 |
| MAP2K7        |                         | ✓               |

ALDOA

ALPK1

AMID

APBA2BP

APEG1

ASCC3L1

ATP5D

BOK

C17orf49

C1orf117

CAMK1G

CRADD

CTPS

CTSD

DDB2

FBXO5

GLI1

GRK1

GSG2

HCK

HECTD3

HSD17B4

ICT1

LIMK2

MAP2K3

MAP3K13

MATK

MCL1

MGC11266

MLCK

NEIL1

NQO2

NR1H3

NTRK1

PBK

PCBD1

PES1

PIK4CB

PKN1

POLA

POLR2E

POLR2I

PRC1

PSMC2

PTP4A2

RASGRF1

RASSF7

REV1L

SCYL1

SLC25A26

SULT1A2

TIE1

UBE2I

UIP1

WEE2

Supplementary Figure 5
