# Supplementary material
Source: PubMed Central journal article supplement (PMC4753257)

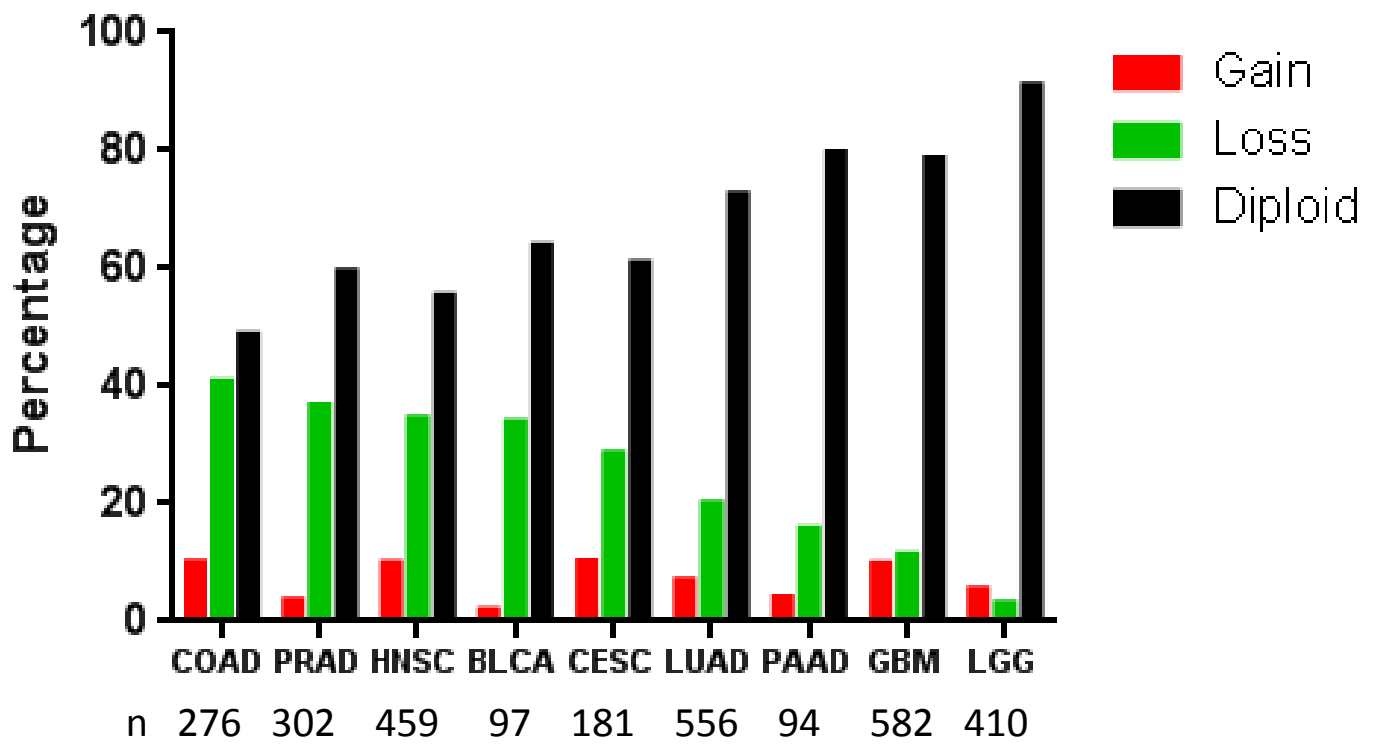

Supplementary Figure 4

Supplement: onc2014469x5.pdf [file onc2014469x5.pdf]

A

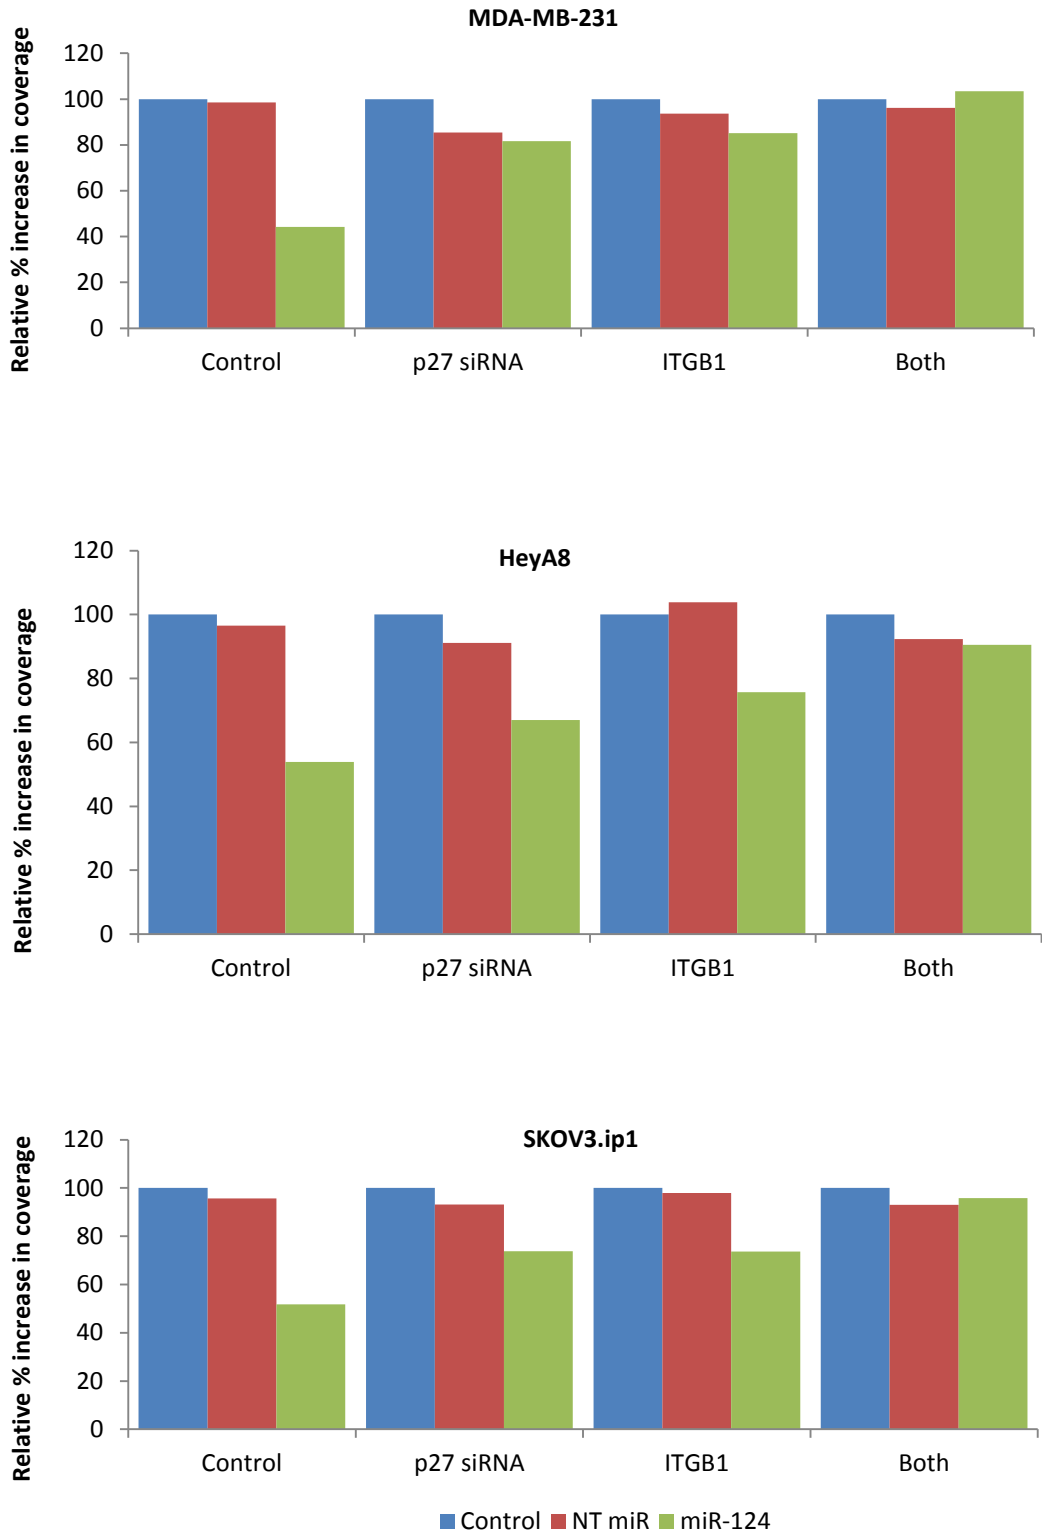

Supplementary Figure 6

Supplement: onc2014469x7.pdf [file onc2014469x7.pdf]
